# Supplementary material for: Modular Synthesis of Organoboron Helically Chiral Compounds: Cutouts from Extended Helices
Source: PubMed Central journal article supplement (PMC7898935; doi:10.1002/anie.202014138), 2021-01-26
Supplement: ANIE-60-4350-s001.pdf [file ANIE-60-4350-s001.pdf]

Supporting Information

**Modular Synthesis of Organoboron Helically Chiral Compounds:  
Cutouts from Extended Helices**

*Julian Full<sup>†</sup>, Santosh P. Panchal<sup>†</sup>, Julian Götz, Ana-Maria Krause, and Agnieszka Nowak-Król\**

anie\_202014138\_sm\_miscellaneous\_information.pdf

## SUPPORTING INFORMATION

## Table of Contents

|                                                                  |    |
|------------------------------------------------------------------|----|
| 1. Materials and Methods .....                                   | 2  |
| 2. Synthesis and Characterization of Organoboron Helicenes ..... | 3  |
| 3. NMR and MS spectra .....                                      | 10 |
| 4. Single crystal X-ray analysis .....                           | 41 |
| 5. Optical and Electrochemical Properties .....                  | 45 |
| 6. Resolution of Enantiomers .....                               | 47 |
| 7. Interconversion Barrier .....                                 | 47 |
| 8. Computations .....                                            | 48 |
| 9. References .....                                              | 86 |

## 1. Materials and Methods

**Synthesis:** All reagents were purchased from commercial sources and used as received without further purification, unless otherwise stated. Reagent grade solvents were distilled prior to use. Column chromatography was performed on silica (silica gel, 230–400 mesh) and flash column chromatography on Interchim PuriFlash 450.

**NMR Spectroscopy:**  $^1\text{H}$ ,  $^{13}\text{C}$  NMR spectra were recorded on a Bruker Avance 400 or an Avance III HD 400 spectrometers and were calibrated to the residual solvent signals.  $J$  values are given in Hz. The following abbreviations were used to designate multiplicities: s = singlet, d = doublet, t = triplet, dd = doublet of doublet, ddd = doublet of doublet of doublet, dm = doublet of multiplet, dt = doublet of triplet, td = triplet of doublet, m = multiplet, br s = broad singlet.

**Mass Spectrometry:** High-resolution mass spectra were obtained by electrospray ionization (ESI), atmospheric-pressure chemical ionization (APCI) or matrix-assisted laser desorption/ionization (MALDI). ESI and APCI spectra were recorded on an ESI micrOTOF Focus spectrometer from Bruker Daltonics. MALDI spectra were recorded on a Bruker Daltonics autoflex II LRF or a Bruker Daltonics ultrafleXtreme spectrometers. *Trans*-2-[3-(4-*tert*-butylphenyl)-2-methyl-2-propenylidene]malononitrile (DCTB) or 2',4'-dihydroxyacetophenone (DHAP) were used as MALDI matrices.

**UV/Vis Absorption Spectroscopy in Solution:** UV/Vis spectra were recorded on a Jasco V-770 UV/Vis spectrometer. All spectroscopy measurements were conducted with spectroscopic grade solvents from ACROS Organics. Conventional quartz cells (light path 1 cm) were used.

**Absorption Spectroscopy in Thin Films:** UV/Vis spectra in the solid state were recorded on a Lambda 950 UV/Vis spectrometer from PerkinElmer equipped with an integration sphere. All spectroscopic measurements were conducted for thin films on commercially available quartz substrates. Prior to use, the quartz substrates were washed with toluene, acetone and isopropanol (spin coater, 3000 rpm, 30 sec.). The thin films were spin-coated ( $2 \times 50$  or  $2 \times 60$   $\mu\text{L}$ ) onto the quartz substrates from solutions of 5 mg/mL or 10 mg/mL in  $\text{CHCl}_3$  or  $\text{CH}_2\text{Cl}_2$  (2000 rpm, 60 sec).

**Fluorescence Spectroscopy in Solution:** The fluorescence spectra were recorded using a FLS 980 fluorescence spectrometer from Edinburgh Instruments equipped with a double monochromator for emission and excitation. The spectra were corrected against photomultiplier and lamp intensity. The fluorescence quantum yields were determined by the optical dilution method ( $\text{OD} \leq 0.05$ )<sup>[1]</sup> as the average value of four to six different excitation wavelengths with perylene ( $\Phi_{\text{fl}} = 0.94$  in cyclohexane)<sup>[2]</sup> as a standard.

**Fluorescence Spectroscopy in the Solid State:** Absolute fluorescence quantum yields of powders were determined on a Hamamatsu Absolute PL Quantum Yield Measurement System CC9920-02. The system is composed of a 150 W CW Xenon lamp as the excitation source, a monochromator (250–700 nm, full width at half-maximum (FWHM) 10 nm), an integrating sphere, and a multichannel spectrometer capable of simultaneously measuring multiple wavelengths between 300 and 950 nm.

**Circular Dichroism (CD) Spectroscopy:** CD spectra were measured with a Jasco J-810 spectropolarimeter equipped with a Jasco CDF-426S Peltier temperature controller.

**Electrochemistry:** Cyclic voltammetry (CV), differential pulse voltammetry (DPV) and square-wave voltammetry (SW) measurements were performed on a standard, commercial electrochemical analyzer (EC epsilon; BAS Instruments, UK) in a three electrode single-compartment cell under an argon atmosphere. The supporting electrolyte  $\text{NBu}_4\text{PF}_6$  was synthesized according to the literature,<sup>[3]</sup> recrystallized from ethanol/water, and dried in a high vacuum. The measurements were carried out in  $\text{CH}_2\text{Cl}_2/0.1$  M  $\text{NBu}_4\text{PF}_6$  under the exclusion of air and moisture at a concentration of  $c \sim 2.5\text{--}2.8 \times 10^{-4}$  M with the ferrocenium/ferrocene redox couple as an internal standard for the calibration of the potential. Working electrode: glassy carbon ( $\varnothing$  1 mm); reference electrode: Ag/AgCl; auxiliary electrode: Pt wire. The internal resistance was compensated by 50%.

## SUPPORTING INFORMATION

## 2. Synthesis and Characterization of Organoboron Helicenes

The synthesis of the **BIQ-Cl**, **PHE-Bpin** and **BEN-Bpin** building blocks are shown in Scheme S1.

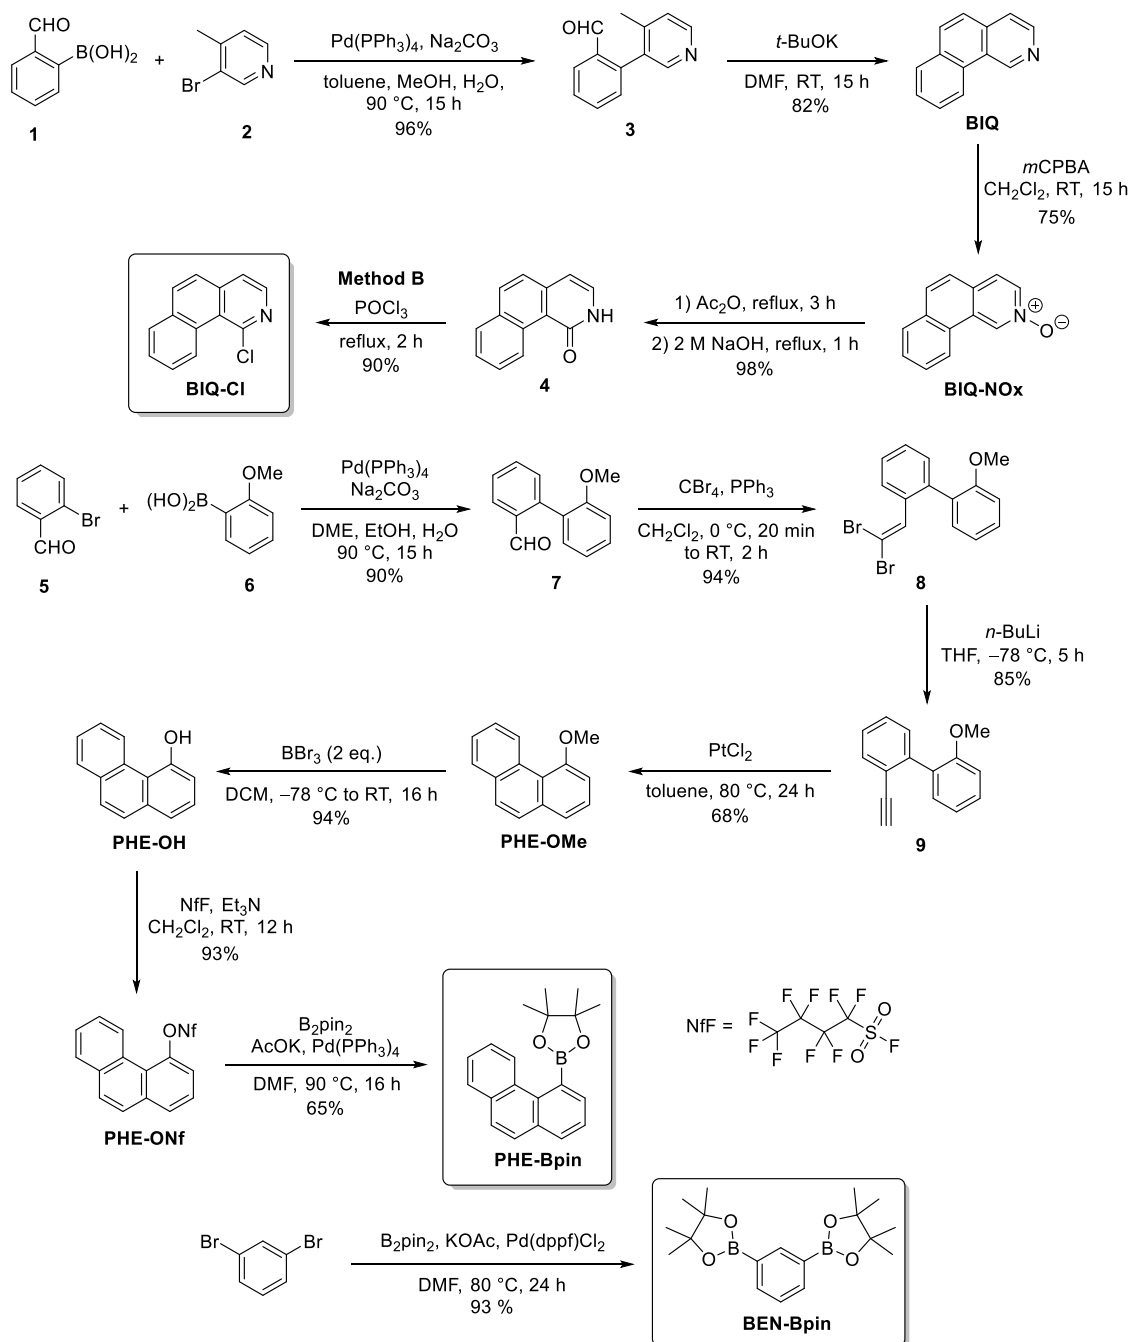

Scheme S1. Synthesis of building blocks **BIQ-Cl**, **PHE-Bpin** and **BEN-Bpin**.

### Synthesis of 2-(4-methylpyridin-3-yl)benzaldehyde (**3**).

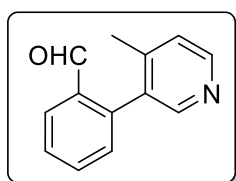

The compound was prepared according to the reported procedure.<sup>[4]</sup> 3-Bromo-4-methylpyridine **1** (3.00 g, 17.4 mmol, 1.00 eq.) was added to a degassed solution of  $\text{Pd}(\text{PPh}_3)_4$  (1.01 g, 0.87 mmol, 0.05 eq.) in toluene (70 mL) under a nitrogen atmosphere. Subsequently, a degassed solution 2-formylphenylboronic acid **2** (2.87 g, 19.2 mmol, 1.10 eq.) in MeOH (35 mL) and a degassed solution of  $\text{Na}_2\text{CO}_3$  (3.70 g, 34.8 mmol, 2.00 eq.) in water (35 mL) were added to the mixture. After heating at  $90^\circ\text{C}$  for 15 h, the reaction mixture was cooled to room temperature and extracted with EtOAc. The combined organic layers were dried over  $\text{MgSO}_4$ , filtered and the solvent was removed under reduced pressure. The crude product was purified

## SUPPORTING INFORMATION

via column chromatography (silica, hexane/EtOAc 85:15) to obtain compound **3** (3.30 g, 96%) as a light yellow solid.  $^1\text{H NMR}$  (400 MHz,  $\text{CD}_2\text{Cl}_2$ ):  $\delta$  = 9.76 (s, 1H, CHO), 8.50 (d,  $J$  = 5.0 Hz, 1H, ArH<sup>Py</sup>), 8.37 (s, 1H, ArH<sup>Py</sup>), 8.02 (ddd,  $J$  = 7.8, 1.4 Hz, 0.4 Hz, 1H, ArH<sup>Ph</sup>), 7.70 (td,  $J$  = 7.5, 1.5 Hz, 1H, ArH<sup>Ph</sup>), 7.61–7.56 (m, 1H, ArH<sup>Ph</sup>), 7.32 (ddd,  $J$  = 7.6, 1.2, 0.5 Hz, 1H<sup>Ph</sup>), 7.25 (d,  $J$  = 5.0 Hz, 1H, ArH<sup>Py</sup>), 2.11 ppm (s, 3H, CH<sub>3</sub>). Analytical data are in accordance with the literature.<sup>[4]</sup>

Synthesis of benzo[*h*]isoquinoline (BIQ).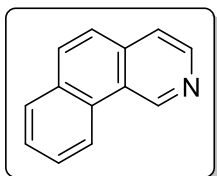

The compound was prepared according to the reported procedure.<sup>[4]</sup> Under a nitrogen atmosphere, a solution of *t*-BuOK (2.28 g, 20.3 mmol, 2.00 eq.) in dry DMF (20 mL) was added dropwise to a solution of aldehyde **3** (2.00 g, 10.1 mmol, 1.00 eq.) in dry DMF (15 mL) and the mixture was stirred at room temperature for 15 h. Subsequently, the reaction was quenched by addition of water. The phases were separated and the aqueous layer was extracted with  $\text{CH}_2\text{Cl}_2$ . The combined organic layers were dried over  $\text{MgSO}_4$ , concentrated under reduced pressure and the crude product was purified via column chromatography (silica, hexane/EtOAc 85:15)

to obtain compound **BIQ** (1.50 g, 82%) as a colorless solid.  $^1\text{H NMR}$  (400 MHz,  $\text{CDCl}_3$ ):  $\delta$  10.06 (s, 1H, ArH<sup>Py</sup>), 8.81 (dd,  $J$  = 8.2, 0.6 Hz, 1H, ArH), 8.72 (d,  $J$  = 5.4 Hz, 1H, ArH<sup>Py</sup>), 7.96–7.93 (m, 2H, ArH), 7.75 (ddd,  $J$  = 8.4, 7.1, 1.5, 1H, ArH), 7.72–7.65 ppm (m, 3H, ArH). Analytical data are in accordance with the literature.<sup>[4]</sup>

Synthesis of benzo[*h*]isoquinolin-*N*-oxide (BIQ-NOx).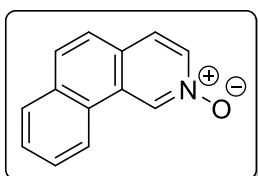

Compound **BIQ** (3.44 g, 19. mmol, 1.00 eq.) was dissolved in  $\text{CH}_2\text{Cl}_2$  (40 mL) and the mixture was cooled to 0 °C. *m*-Chloroperoxybenzoic acid (6.63 g, 38.4 mmol, 2.00 eq.) was added portionwise. The mixture was allowed to warm to room temperature and it was stirred for 15 h. To dissolve the precipitated solid, MeOH (100 mL) was added followed by saturated aqueous  $\text{NaHCO}_3$  (40 mL). The mixture was extracted with  $\text{CH}_2\text{Cl}_2$ . The combined organic layers were dried over  $\text{Na}_2\text{SO}_4$ , filtered, and the solvent was removed *in vacuo*. The crude product was purified via column chromatography (silica, EtOAc, then EtOAc/MeOH 10:1) to obtain **BIQ-NOx** (2.82 g, 75%) as a beige solid. **m.p.** 177.2 – 183.2 °C (decomposition).  $^1\text{H NMR}$

(400 MHz,  $\text{CDCl}_3$ ):  $\delta$  = 9.46 (s, 1H, ArH), 8.46–8.40 (m, 1H, ArH), 8.31 (dd,  $J$  = 6.9, 1.7 Hz, 1H), 7.94–7.91 (m, 1H, ArH), 7.85 (d,  $J$  = 8.8 Hz, 1H), 7.77–7.68 (m, 3H, ArH), 7.64 ppm (d,  $J$  = 8.8 Hz, 1H).  $^{13}\text{C NMR}$  (101 MHz,  $\text{CDCl}_3$ ):  $\delta$  = 136.9, 133.7, 132.8, 130.4, 129.1, 128.7, 128.4, 128.2, 127.4, 126.8, 124.5, 123.9, 122.2 ppm. **HRMS** (APCI) *m/z* calcd for  $\text{C}_{13}\text{H}_{10}\text{NO}$  [ $\text{M}+\text{H}$ ]<sup>+</sup> 196.0757, found 196.0755.

Synthesis of benzo[*h*]isoquinolin-1-one (**4**).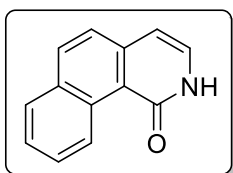

Compound **BIQ-NOx** (7.20 g, 36.9 mmol, 1.00 eq.) was dissolved in  $\text{Ac}_2\text{O}$  (122 mL) and the mixture was heated to reflux for 3 h. Subsequently,  $\text{Ac}_2\text{O}$  was removed under reduced pressure and 2 M NaOH (250 mL) was added. The mixture was heated under reflux for additional 1 h, allowed to cool to room temperature and a 5% aqueous solution of acetic acid was added until pH=6 was reached. The mixture was extracted with  $\text{CH}_2\text{Cl}_2$ , the combined organic layers were dried over  $\text{MgSO}_4$ , filtered, and the solvent was removed *in vacuo*.

The residue was recrystallized from MeOH to obtain **4** (7.0 g, 98%) as brown crystals. **m.p.** 212.5 – 213.5 °C (MeOH).  $^1\text{H NMR}$  (400 MHz,  $\text{DMSO}-d_6$ ):  $\delta$  = 11.69 (br s, 1H, NH), 10.13 (dm,  $J$  = 8.6 Hz, 1H, ArH), 8.14 (d,  $J$  = 8.6 Hz, 1H, ArH), 8.01 (dd,  $J$  = 7.9 Hz, 1.4 Hz, 1H, ArH), 7.72–7.68 (m, 2H, ArH), 7.62 (ddd,  $J$  = 8.1, 6.9, 1.3, 1H, ArH), 7.45 (d,  $J$  = 6.6 Hz, 1H, ArH), 6.74 ppm (d,  $J$  = 6.8 Hz, 1H, ArH).  $^1\text{H NMR}$  (400 MHz,  $\text{CDCl}_3$ )  $\delta$  = 11.66 (br s, 1H, NH), 10.23 (d,  $J$  = 8.5 Hz, 1H, ArH), 8.05 (d,  $J$  = 8.6 Hz, 1H, ArH), 7.93 (dd,  $J$  = 8.0, 1.4 Hz, 1H), 7.78 (ddd,  $J$  = 8.6, 6.9, 1.5 Hz, 1H), 7.64 (ddd,  $J$  = 8.1, 6.9, 1.2 Hz, 1H), 7.58 (d,  $J$  = 8.6 Hz, 1H, ArH), 7.45 (d,  $J$  = 6.8 Hz, 1H, ArH), 6.74 ppm (d,  $J$  = 6.9 Hz, 1H, ArH).  $^{13}\text{C NMR}$  (101 MHz,  $\text{DMSO}-d_6$ ):  $\delta$  = 162.8 (CO), 139.9, 133.4, 131.7, 131.5, 130.8, 128.4, 127.9, 126.4, 126.0, 125.2, 118.8, 105.7 ppm. **HRMS** (APCI) *m/z* calcd for  $\text{C}_{13}\text{H}_9\text{NO}$  [ $\text{M}+\text{H}$ ]<sup>+</sup> 196.0757, found 196.0755. **Elemental analysis** calcd (%) for  $\text{C}_{13}\text{H}_9\text{NO}$ : C, 79.98; H, 4.65; N, 7.17, found: C, 79.79; H, 4.63; N, 7.15. Analytical data are in accordance with the literature.<sup>[5]</sup>

Synthesis of 1-chlorobenzo[*h*]isoquinoline (BIQ-Cl).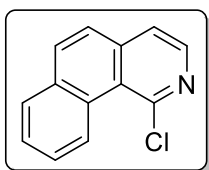

**Method A:** The compound was prepared according to the reported procedure.<sup>[6]</sup> *m*-Chloroperoxybenzoic acid (*m*-CPBA) (2.17 g, 12.5 mmol, 1.50 eq.) was added slowly to a solution of benzo[*h*]isoquinoline **BIQ** (1.5 g, 8.37 mmol, 1.00 eq.) in dry  $\text{CH}_2\text{Cl}_2$  (15 mL). The reaction mixture was stirred at room temperature for 4 h, quenched with saturated aqueous  $\text{Na}_2\text{CO}_3$  solution and extracted with  $\text{CH}_2\text{Cl}_2$ . The combined organic layers were dried over  $\text{Na}_2\text{SO}_4$ , filtered and the solvent was removed under reduced pressure. The crude benzo[*h*]isoquinoline *N*-oxide was directly used without any further purification.  $\text{POCl}_3$  (2.58 mL, 27.6 mmol,

3.30 eq.) was added to a solution to crude benzo[*h*]isoquinoline *N*-oxide in dry chloroform (25 mL) and the mixture was refluxed for 3 h. Subsequently, the reaction mixture was cooled to room temperature and poured into ice water. Concentrated aqueous ammonia was added dropwise until the solution was basic. The layers were separated and the aqueous layer was extracted with  $\text{CH}_2\text{Cl}_2$ . The combined organic layers were dried over  $\text{Na}_2\text{SO}_4$ , filtered and the solvent was removed under reduced pressure. The crude product was recrystallized (chloroform/hexane) to obtain compound **BIQ-Cl** (1.50 g, 83%) as yellow crystals.  $^1\text{H NMR}$  (400 MHz,  $\text{CDCl}_3$ ):  $\delta$  = 9.93–9.89 (dm, 1H, ArH), 8.45 (d,  $J$  = 5.1 Hz, 1H, ArH), 7.99–7.95 (m, 2H, ArH), 7.79–7.68 ppm (m, 4H, ArH).

## SUPPORTING INFORMATION

**Method B:** A solution of **4** (50.0 mg, 0.35 mmol, 1.00 eq.) in  $\text{POCl}_3$  (1.00 mL, 1.07 mmol, 41.0 eq.) was refluxed for 2 h under a nitrogen atmosphere. Then  $\text{POCl}_3$  was evaporated and cold, saturated aqueous  $\text{Na}_2\text{CO}_3$  (2 mL) was added to the residue. The mixture was extracted with  $\text{CH}_2\text{Cl}_2$ . The combined organic layers were dried over  $\text{MgSO}_4$ , filtered and concentrated under reduced pressure. The residue was filtered through a short plug of silica (EtOAc) and the solvent was removed *in vacuo* to obtain **BIQ-CI** (49.0 mg, 90%) as a yellow solid. **m.p.** 96.7 – 98.9 °C.  $^1\text{H NMR}$  (400 MHz,  $\text{CD}_2\text{Cl}_2$ ):  $\delta$  = 9.90–9.87 (dm, 1H, ArH), 8.42 (d,  $J$  = 5.1 Hz, 1H, ArH), 8.04–7.95 (m, 2H, ArH), 7.82–7.69 ppm (m, 4H, ArH).  $^1\text{H NMR}$  (400 MHz,  $\text{CDCl}_3$ ):  $\delta$  = 9.93–9.88 (m, 1H, ArH), 8.45 (d,  $J$  = 5.1 Hz, 1H, ArH), 8.00–7.95 (m, 2H, ArH), 7.81–7.69 ppm (m, 4H, ArH).  $^{13}\text{C NMR}$  (101 MHz,  $\text{CD}_2\text{Cl}_2$ ):  $\delta$  = 149.3, 143.6, 140.8, 134.2, 133.5, 129.7, 129.0, 128.3, 127.9, 127.4, 125.7, 124.4, 122.4 ppm. **HRMS** (ESI)  $m/z$  calcd for  $\text{C}_{13}\text{H}_9\text{ClN}$   $[\text{M}+\text{H}]^+$  214.0418, found 214.0416. **Elemental analysis** calcd (%) for  $\text{C}_{13}\text{H}_8\text{ClN}$ : C, 73.08; H, 3.77; N, 6.56, found: C, 72.99; H, 4.00; N, 6.57.

**Synthesis of 2'-methoxy-[1,1'-biphenyl]-2-carbaldehyde (7).**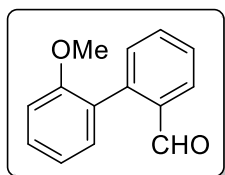

The compound was prepared according to the reported procedure.<sup>[7]</sup> 2-Bromobenzaldehyde **5** (5.00 g, 27.0 mmol, 1.00 eq.) was dissolved in degassed DME (70 mL) and  $\text{Pd}(\text{PPh}_3)_4$  (937 mg, 0.81 mmol, 0.03 eq.) was added. Subsequently, a degassed solution of 2-methoxyphenylboronic acid **6** (4.93 g, 32.4 mmol, 1.20 eq.) in EtOH (15 mL) and a degassed solution of  $\text{Na}_2\text{CO}_3$  (5.73 g, 54.0 mmol, 2.00 eq.) in water (15 mL) were added. After heating under reflux for 15 h the reaction mixture was brought to room temperature and diluted with diethyl ether. The phases were separated and the organic layer was washed with brine, dried over  $\text{Na}_2\text{SO}_4$  and all volatiles were removed under reduced pressure. The crude product was purified via flash column chromatography (silica, hexane/EtOAc 90:10) to obtain compound **7** (5.10 g, 90%) as a white solid.  $^1\text{H NMR}$  (400 MHz,  $\text{CDCl}_3$ ):  $\delta$  = 9.79 (d,  $J$  = 0.8 Hz, 1H, CHO), 8.00 (dd,  $J$  = 7.8, 1.5, 0.5 Hz, 1H, ArH), 7.65 (td,  $J$  = 7.5, 1.5 Hz, 1H, ArH), 7.51–7.46 (m, 1H, ArH), 7.42 (tm,  $J$  = 8.3, 7.5, 1.8 Hz, 1H, ArH), 7.36 (dm,  $J$  = 7.7, 1.3, 0.5 Hz, 1H, ArH), 7.29 (dd,  $J$  = 7.5, 1.8, 0.2 Hz, 1H, ArH), 7.09 (td,  $J$  = 7.5, 1.1 Hz, 1H, ArH), 6.98 (dd,  $J$  = 8.3, 0.9 Hz, 1H, ArH), 3.74 ppm (s, 3H,  $\text{OCH}_3$ ). Analytical data are in accordance with the literature.<sup>[7]</sup>

**Synthesis of 2-(2,2-dibromovinyl)-2'-methoxy-1,1'-biphenyl (8).**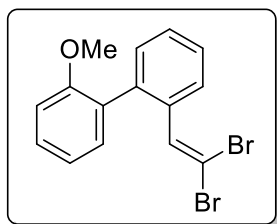

$\text{CBr}_4$  (19.5 g, 58.9 mmol, 2.50 eq.) was added to a solution of  $\text{PPh}_3$  (30.9 g, 117 mmol, 5.00 eq.) in dry  $\text{CH}_2\text{Cl}_2$  (400 mL) under a nitrogen atmosphere and the resulting mixture was stirred at 0 °C for 20 min. Subsequently, a solution of aldehyde **7** (5.00 g, 23.5 mmol, 1.00 eq.) in  $\text{CH}_2\text{Cl}_2$  (100 mL) was added dropwise and the reaction was allowed to warm to room temperature. After stirring for 2 h the reaction was quenched with brine and extracted with  $\text{CH}_2\text{Cl}_2$ . The combined organic layers were dried over  $\text{Na}_2\text{SO}_4$ , filtered, and the solvent was removed *in vacuo*. The crude product was purified via column chromatography (silica, hexane/EtOAc = 95:5) to obtain compound **8** (8.20 g, 94%) as a yellow oil.  $^1\text{H NMR}$  (400 MHz,  $\text{CDCl}_3$ ):  $\delta$  = 7.72–7.64 (m, 1H, ArH), 7.45–7.35 (m, 3H, ArH), 7.35–7.29 (m, 1H, ArH), (ddd,  $J$  = 7.5, 1.8, 0.2 Hz, 1H), 7.15 (d,  $J$  = 0.4 Hz, 1H,  $\text{H}^{\text{vinyl}}$ ), 7.04 (td,  $J$  = 7.4, 1.1 Hz, 1H, ArH), 6.99 (dd,  $J$  = 8.3, 1.0 Hz, 1H, ArH), 3.81 (s, 3H,  $\text{OCH}_3$ ).  $^{13}\text{C NMR}$  (101 MHz,  $\text{CDCl}_3$ ):  $\delta$  = 156.7, 138.2, 137.5, 135.3, 131.4, 130.6, 129.5, 129.1, 128.52, 128.48, 127.2, 120.7, 111.0, 90.1, 55.6 ppm. **HRMS** (APCI):  $m/z$  calcd for  $\text{C}_{15}\text{H}_{13}\text{Br}_2\text{O}$   $[\text{M}+\text{H}]^+$ : 366.9328; found: 366.9333.

**Synthesis of 2-ethynyl-2'-methoxy-1,1'-biphenyl (9).**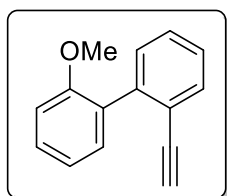

The compound was prepared according to the reported procedure.<sup>[7]</sup> Dibromide **8** (8.00 g, 21.7 mmol, 1.00 eq.) was dissolved in dry THF (120 mL) under a nitrogen atmosphere, and cooled to -78 °C. Subsequently, *n*-BuLi (1.6 M in THF, 34.0 mL, 54.3 mmol, 2.50 eq.) was added and the reaction mixture was stirred at -78 °C for 5 h. Afterwards, the reaction was allowed to warm to room temperature, quenched with water and extracted with diethyl ether. The combined organic layers were dried over  $\text{Na}_2\text{SO}_4$ , filtered, and all volatiles were removed under reduced pressure. The crude product was purified via flash chromatography (silica, hexane/EtOAc 98:2) to obtain alkyne **9** (3.80 g, 85%) as a colorless oil.  $^1\text{H NMR}$  (400 MHz,  $\text{CDCl}_3$ ):  $\delta$  = 7.60 (dd,  $J$  = 7.6, 0.8 Hz, 1H, ArH), 7.43–7.27 (m, 5H, ArH), 7.05–6.97 (m, 2H, ArH), 3.79 (s, 3H,  $\text{OCH}_3$ ), 2.93 ppm (s, 1H, CCH). Analytical data are in accordance with the literature.<sup>[7]</sup>

**Synthesis of 4-methoxyphenanthrene (PHE-OMe).**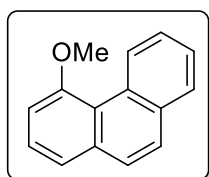

The compound was prepared according to the reported procedure.<sup>[7]</sup> **9** (3.50 g, 16.8 mmol, 1.00 eq.) was dissolved in dry toluene (60 mL) under an argon atmosphere and  $\text{PtCl}_2$  (224 mg, 840  $\mu\text{mol}$ , 0.05 eq.) was added. The reaction was heated to 80 °C and it was stirred for 24 h at this temperature. Afterwards, the reaction was allowed to get room temperature and subsequently the solvent was removed under reduced pressure. The crude product was purified via column chromatography (silica, hexane/EtOAc = 90:10) to obtain compound **PHE-OMe** (2.38 g, 68%) as a colorless solid.  $^1\text{H NMR}$  (400 MHz,  $\text{CDCl}_3$ ):  $\delta$  = 9.67 (dm,  $J$  = 8.5 Hz, 1H, ArH), 7.88 (dd,  $J$  = 7.7, 1.7 Hz, 1H, ArH), 7.75 (d,  $J$  = 8.8 Hz, 1H, ArH), 7.71 (d,  $J$  = 8.8 Hz, 1H, ArH), 7.64 (ddd,  $J$  = 8.6, 7.0, 1.7, 1H, ArH), 7.58 (ddd,  $J$  = 7.7, 7.0, 1.3, 1H, ArH), 7.55–7.52 (m, 2H, ArH), 7.17 (dd,  $J$  = 6.2, 2.9 Hz, 1H, ArH), 4.15 ppm (s, 1H,  $\text{OCH}_3$ ). Analytical data are in accordance with the literature.<sup>[7]</sup>

## SUPPORTING INFORMATION

## Synthesis of phenanthren-4-ol (PHE-OH).

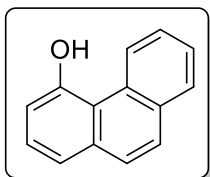

The compound was prepared according to the reported procedure.<sup>[8]</sup> Compound **PHE-OMe** (2.50 g, 12.0 mmol, 1.00 eq.) was dissolved in dry CH<sub>2</sub>Cl<sub>2</sub> (75 mL) under a nitrogen atmosphere and the reaction mixture was cooled to -78 °C. Then BBr<sub>3</sub> (2.28 mL, 24.0 mmol, 6.01 g, 2.00 eq.) was added. The mixture was allowed to warm to room temperature and was stirred at this temperature for 16 h. Subsequently, the reaction was quenched by the addition of water. The phases were separated and the aqueous layer was extracted with CH<sub>2</sub>Cl<sub>2</sub>. The combined organic layers were washed with brine, dried over MgSO<sub>4</sub> and all volatiles were removed under reduced pressure. The crude product was purified via column chromatography (silica, hexane/CH<sub>2</sub>Cl<sub>2</sub>

4:1) to obtain compound **PHE-OH** (2.19 g, 94%) as a colorless solid. <sup>1</sup>H NMR (400 MHz, CDCl<sub>3</sub>): δ = 9.66 (dd, *J* = 8.5, 1.2, 0.7 Hz, 1H, ArH), 7.90 (dd, *J* = 7.8, 1.6 Hz, 1H, ArH), 7.75 (d, *J* = 8.9 Hz, 1H, ArH), 7.72–7.65 (m, 2H, ArH), 7.61 (ddd, *J* = 7.8, 7.0, 1.3 Hz, 1H, ArH), 7.53 (dd, *J* = 7.9, 1.2 Hz, 1H, ArH), 7.43 (t, *J* = 7.7 Hz, 1H, ArH), 6.97 (dd, *J* = 7.6, 1.3 Hz, 1H, ArH), 5.64 ppm (d, *J* = 0.5 Hz, 1H, OH). Analytical data are in accordance with the literature.<sup>[8]</sup>

## Synthesis of phenanthren-4-yl 1,1,2,2,3,3,4,4,4-nonafluorobutane-1-sulfonate (PHE-ONf).

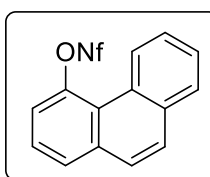

Compound **PHE-OH** (1.31 g, 6.73 mmol, 1.00 eq.) was dissolved in CH<sub>2</sub>Cl<sub>2</sub> (60 mL) and NEt<sub>3</sub> (2.00 mL, 14.3 mmol, 1.45 g, 2.13 eq.) was added, followed by perfluorobutane-1-sulfonyl fluoride (1.46 mL, 8.13 mmol, 2.46 g, 1.21 eq.). The reaction mixture was stirred at room temperature under exclusion of light. After 12 h dist. H<sub>2</sub>O was added (50 mL). The phases were separated and the aqueous layer was extracted with CH<sub>2</sub>Cl<sub>2</sub> (3 x 50 mL). The combined organic layers were washed with H<sub>2</sub>O (3 x 50 mL), dried over MgSO<sub>4</sub>, filtered and evaporated. The crude product was purified via column chromatography (silica, hexane/EtOAc 4:1) to obtain compound **PHE-ONf** (3.00 g, 93%) as a colorless oil. <sup>1</sup>H NMR (400 MHz, CD<sub>2</sub>Cl<sub>2</sub>): δ = 9.20–9.15 (m, 1H, ArH),

8.00–7.93 (m, 2H, ArH), 7.85 (d, *J* = 8.8 Hz, 1H, ArH), 7.78 (d, *J* = 8.9 Hz, 1H, ArH), 7.75–7.68 (m, 2H, ArH), 7.67–7.61 ppm (m, 2H, ArH). <sup>1</sup>H NMR (400 MHz, CDCl<sub>3</sub>): δ = 9.19 (dd, *J* = 8.4, 1.1 Hz, 1H, ArH), 7.96–7.90 (m, 2H, ArH), 7.82 (d, *J* = 8.8 Hz, 1H, ArH), 7.77–7.58 ppm (m, 5H, ArH). <sup>13</sup>C NMR (101 MHz, CD<sub>2</sub>Cl<sub>2</sub>): δ = 147.8, 135.8, 133.9, 129.9 (CH), 129.6 (CH), 129.5 (CH), 128.3 (CH), 127.9, 127.73 (CH), 127.70 (CH), 126.88 (CH), 126.85 (CH), 123.7, 121.2 (t, *J* = 1.8 Hz, 1C, CH), 119.4–106.2 ppm (m, 4C, CF). Analytical data are in accordance with the literature.<sup>[8]</sup>

## Synthesis of 4,4,5,5-tetramethyl-2-(phenanthren-4-yl)-1,3,2-dioxaborolane (PHE-Bpin).

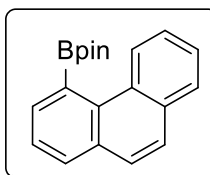

Compound **PHE-ONf** (3.00 g, 7.28 mmol, 1.00 eq.), bis(pinacolato)diborane (2.77 g, 10.9 mmol, 1.50 eq.) and KOAc (4.29 g, 43.7 mmol, 6.00 eq.) were dissolved in anhydrous DMF (100 mL) under an inert atmosphere, and the mixture was degassed for 30 min. Subsequently, Pd(PPh<sub>3</sub>)<sub>4</sub> (841 mg, 728 μmol, 0.10 eq.) was added and the reaction was heated to 90 °C. The reaction mixture was stirred at this temperature for 16 h and then allowed to cool to room temperature. The mixture was filtered through a plug of Celite and the filtrate was washed with ice water and brine. The organic layer was dried over MgSO<sub>4</sub>, filtered

and the solvent was removed under reduced pressure. The crude product was purified via column chromatography (silica, hexane/EtOAc, 95:5) to obtain **PHE-Bpin** (1.44 g, 65%) as a colorless solid. <sup>1</sup>H NMR (400 MHz, CDCl<sub>3</sub>): δ = 8.57–8.53 (m, 1H, ArH), 7.92 (dd, *J* = 7.9, 1.4 Hz, 1H, ArH), 7.89–7.87 (m, 1H, ArH), 7.84 (dd, *J* = 7.0, 1.4 Hz, 1H, ArH), 7.74 (d, *J* = 9.0 Hz, 1H, ArH), 7.71 (d, *J* = 8.8 Hz, 1H, ArH), 7.61–7.54 (m, 3H, ArH), 1.50 ppm (s, 12H, CH<sub>3</sub>). <sup>1</sup>H NMR (400 MHz, CD<sub>2</sub>Cl<sub>2</sub>): δ = 8.54–8.51 (m, 1H, ArH), 7.95 (dd, *J* = 7.9, 1.5 Hz, 1H, ArH), 7.93–7.90 (m, 1H, ArH), 7.82 (dd, *J* = 7.0, 1.4 Hz, 1H, ArH), 7.77 (d, *J* = 9.0 Hz, 1H, ArH), 7.74 (d, *J* = 8.8 Hz, 1H, ArH), 7.65–7.56 (m, 3H, ArH), 1.48 ppm (s, 12H, CH<sub>3</sub>). <sup>13</sup>C NMR (101 MHz, CD<sub>2</sub>Cl<sub>2</sub>): δ = 134.1, 133.4, 133.3, 132.8, 131.3, 130.9, 128.8, 128.0, 127.4, 127.2, 127.1, 126.3, 125.8, 84.8 (CCH<sub>3</sub>), 25.10 (CCH<sub>3</sub>). One carbon signal is not visible due to the quadrupolar relaxation <sup>11</sup>B NMR (128 MHz, CD<sub>2</sub>Cl<sub>2</sub>): δ = 32.8 ppm. HRMS (ESI) *m/z* calcd for C<sub>20</sub>H<sub>24</sub>BNaO<sub>2</sub> [M+Na]<sup>+</sup> 327.1527, found: 327.1536.

Synthesis of 1-(phenanthren-4-yl)benzo[*h*]isoquinoline (BA).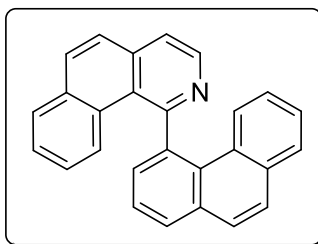

**Method A:** 1-Chlorobenzo[*h*]isoquinoline **BIQ-Cl** (125 mg, 585 μmol, 1.00 eq.) was dissolved in DME (4 mL) under an inert atmosphere and a solution of boronic acid ester **PHE-Bpin** (178 mg, 585 μmol, 1.00 eq.) in MeOH (1.2 mL) was added followed by a solution of Na<sub>2</sub>CO<sub>3</sub> (186 mg, 1.76 mmol, 3.00 eq.) in water (1.4 mL). The mixture was degassed and subsequently Pd(PPh<sub>3</sub>)<sub>4</sub> (20.3 mg, 18.0 μmol, 0.03 eq.) was added. The reaction mixture was heated up to 85 °C for 16 h. Afterwards the reaction mixture was brought to room temperature, diluted with water and extracted with EtOAc. The combined organic layers were washed with water and brine, dried over Na<sub>2</sub>SO<sub>4</sub>, filtered and the solvent was removed under reduced pressure. The crude product was purified by flash column chromatography (silica, hexane/EtOAc 8:2) to obtain desired compound **BA** (110 mg,

53%) as a white solid. <sup>1</sup>H NMR (400 MHz, CDCl<sub>3</sub>): δ = 8.77 (d, *J* = 5.3 Hz, 1H, ArH), 8.14–8.01 (m, 2H, ArH), 7.91–7.82 (m, 7H, ArH), 7.63 (t, *J* = 7.6, 1H, ArH), 7.49–7.42 (m, 2H, ArH), 7.37 (ddd, *J* = 8.0, 7.0, 1.0 Hz, 1H, ArH), 7.32 (dm, *J* = 7.2 Hz, 1H, ArH), 7.05 (ddd, *J* = 8.6, 7.0, 1.4 Hz, 1H, ArH), 6.95 ppm (ddd, *J* = 8.5, 7.0, 1.5 Hz, 1H, ArH). Analytical data are in accordance with the literature.<sup>[6]</sup>

## SUPPORTING INFORMATION

**Method B:** 1-Chlorobenzo[*h*]isoquinoline **BIQ-Cl** (100 mg, 468  $\mu\text{mol}$ , 1.00 eq.) was dissolved in DME (2 mL) under an inert atmosphere and a solution of boronic acid ester **PHE-Bpin** (156 mg, 515  $\mu\text{mol}$ , 1.10 eq.) in MeOH (1 mL) was added followed by a solution of  $\text{Cs}_2\text{CO}_3$  (305 mg, 936  $\mu\text{mol}$ , 2.00 eq.) in water (1 mL). The mixture was degassed and subsequently  $\text{Pd}(\text{PPh}_3)_4$  (27.0 mg, 23.4  $\mu\text{mol}$ , 0.05 eq.) was added. The reaction mixture was heated up to 80 °C. After 15 h the reaction was brought to room temperature, diluted with water and the mixture was extracted with  $\text{CH}_2\text{Cl}_2$ . The combined organic layers were washed with water and brine, dried over  $\text{MgSO}_4$ , filtered and the volatiles were removed under reduced pressure. The crude product was purified via flash column chromatography (silica, hexane/EtOAc 3:2) to obtain compound **BA** (87.0 mg, 52%) as a colorless solid.  $^1\text{H NMR}$  (400 MHz,  $\text{CDCl}_3$ ):  $\delta$  = 8.75 (d,  $J$  = 5.2 Hz, 1H, ArH), 8.05 (dd,  $J$  = 7.9, 1.4 Hz, 1H, ArH), 8.02 (d,  $J$  = 8.8 Hz, 1H, ArH), 7.93–7.81 (m, 7H, ArH), 7.61 (dd,  $J$  = 7.8, 7.3, 1H, ArH), 7.54 (dm,  $J$  = 8.6 Hz, 1H, ArH), 7.43 (ddd,  $J$  = 8.0, 7.0, 1.1 Hz, 1H, ArH), 7.37 (ddd,  $J$  = 8.0, 7.0, 1.1 Hz, 1H, ArH), 7.28 (dd,  $J$  = 7.3, 1.4 Hz, 1H, ArH), 7.04 (ddd,  $J$  = 8.6, 7.0, 1.5 Hz, 1H, ArH), 6.96 ppm (ddd,  $J$  = 8.6, 7.0, 1.5 Hz, 1H, ArH). Analytical data are in accordance with the literature.<sup>[6]</sup>

Synthesis of H1-Br<sub>2</sub>.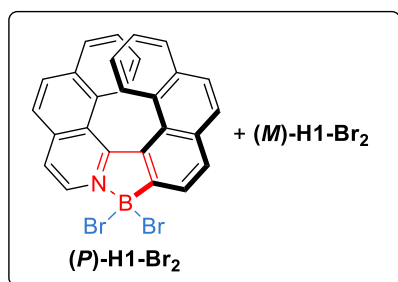

Biaryl **BA** (70.0 mg, 197  $\mu\text{mol}$ , 1.00 eq.) was dissolved in  $\text{CH}_2\text{Cl}_2$  (2 mL) and *i*-Pr<sub>2</sub>NEt (351  $\mu\text{L}$ , 197  $\mu\text{mol}$ ) was added under an inert atmosphere. The mixture was cooled to 0 °C and  $\text{BBr}_3$  (56.1  $\mu\text{L}$ , 591  $\mu\text{mol}$ , 148 mg, 3.00 eq.) was added dropwise. The reaction mixture was brought to room temperature and it was stirred for 24 h at this temperature. Subsequently, the reaction was quenched with saturated aqueous  $\text{K}_2\text{CO}_3$  solution and the mixture was diluted with  $\text{CH}_2\text{Cl}_2$  and water. The phases were separated and the aqueous phase was extracted with  $\text{CH}_2\text{Cl}_2$ . The combined organic layers were washed with water and brine, dried over  $\text{MgSO}_4$ , filtered and the volatiles were removed under reduced pressure. The crude product was used in the next step without any further purification. **HRMS** (ESI)  $m/z$  calcd for  $\text{C}_{27}\text{H}_{16}\text{BBr}_2\text{NNa}$  [ $\text{M}+\text{Na}$ ]<sup>+</sup> 545.9635, found: 545.9621.

Synthesis of H1-Me<sub>2</sub>.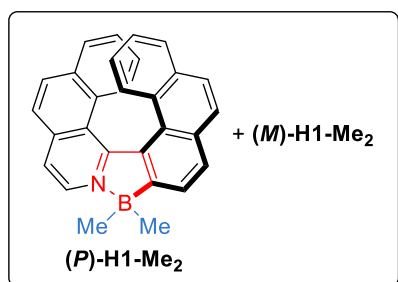

Compound **H1-Br<sub>2</sub>** (50.0 mg, 952  $\mu\text{mol}$ , 1.00 eq.) was dissolved in a mixture of  $\text{CH}_2\text{Cl}_2$  (1 mL) and toluene (1 mL) and  $\text{AlMe}_3$  (2 M solution in hexane, 105  $\mu\text{L}$ , 210  $\mu\text{mol}$ , 2.20 eq.) was added dropwise under an inert atmosphere. The reaction was stirred for 4 h and quenched with water. The phases were separated and the aqueous layer was extracted with  $\text{CH}_2\text{Cl}_2$ . The combined organic layers were washed with water and brine, dried over  $\text{MgSO}_4$ , filtered and the solvent was removed under reduced pressure. The crude product was purified via flash chromatography (silica,  $\text{CH}_2\text{Cl}_2$ /hexane 95:5) to obtain compound **H1-Me<sub>2</sub>** (20.0 mg, 53%) as a yellow solid. **m.p.** 259–262 °C.  $^1\text{H NMR}$  (400 MHz,  $\text{CD}_2\text{Cl}_2$ ):  $\delta$  = 8.54 (d,  $J$  = 5.8 Hz, 1H, ArH), 8.00–7.97 (m, 2H, ArH), 7.94 (d,  $J$  = 7.5 Hz, 1H, ArH), 7.85–7.81 (m, 2H, ArH), 7.79 (d,  $J$  = 8.7 Hz, 1H, ArH), 7.66 (d,  $J$  = 8.6 Hz, 1H, ArH), 7.64–7.57 (m, 2H, ArH), 7.55 (dm,  $J$  = 7.9 Hz, 1H, ArH), 7.28 (dm,  $J$  = 8.5 Hz, 1H, ArH), 7.15 (ddd,  $J$  = 8.0, 7.0, 1.2 Hz, 1H, ArH), 7.01 (ddd,  $J$  = 8.0, 6.9, 1.2 Hz, 1H, ArH), 6.43 (ddd,  $J$  = 8.4, 7.0, 1.4 Hz, 1H, ArH), 6.30 (ddd,  $J$  = 8.4, 6.9, 1.4 Hz, 1H, ArH), 0.26 (s, 3H,  $\text{CH}_3$ ), 0.19 (s, 3H,  $\text{CH}_3$ ) ppm.  $^{13}\text{C NMR}$  (101 MHz,  $\text{CD}_2\text{Cl}_2$ ):  $\delta$  = 157.2, 139.1, 136.1, 134.1, 132.7, 132.54, 132.45, 131.71, 131.69, 130.4, 129.9, 129.3, 128.3, 127.7, 127.48, 127.44, 127.0, 126.7, 125.9, 125.82, 125.79, 124.7, 124.5, 123.7, 120.2 ppm. Signals corresponding to the C atoms bound to the B atom are not visible.  $^{11}\text{B NMR}$  (128 MHz,  $\text{CD}_2\text{Cl}_2$ ):  $\delta$  = 0.4 ppm. **HRMS** (APCI)  $m/z$  calcd for  $\text{C}_{29}\text{H}_{23}\text{BN}$  [ $\text{M}+\text{H}$ ]<sup>+</sup> 396.1918, found 396.1908.

Synthesis of H1-Et<sub>2</sub>.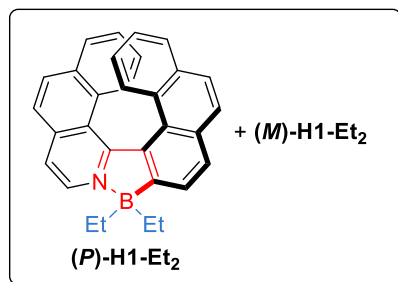

**Method A:** Compound **H1-Br<sub>2</sub>** (30.0 mg, 57.1  $\mu\text{mol}$ , 1.00 eq.) was dissolved in a mixture of  $\text{CH}_2\text{Cl}_2$  (0.5 mL) and toluene (0.5 mL) and  $\text{AlEt}_3$  (1 M solution in *n*-hexane, 126  $\mu\text{L}$ , 126  $\mu\text{mol}$ , 2.20 eq.) was added dropwise under an inert atmosphere. The reaction was stirred for 2 h and subsequently quenched with water. The phases were separated and the aqueous layer was extracted with  $\text{CH}_2\text{Cl}_2$ . The combined organic layers were washed with water and brine, dried over  $\text{MgSO}_4$ , filtered and the solvent was removed under reduced pressure. The crude product was purified via flash chromatography (silica,  $\text{CH}_2\text{Cl}_2$ /hexane 10:1) to obtain compound **H1-Et<sub>2</sub>** (13 mg, 54%) as a light yellow solid. **m.p.** 189 – 192 °C.  $^1\text{H NMR}$  (400 MHz,  $\text{CD}_2\text{Cl}_2$ ):  $\delta$  = 8.44 (d,  $J$  = 5.9 Hz, 1H, ArH), 8.01–7.97 (m, 2H, ArH), 7.93 (d,  $J$  = 7.5 Hz, 1H, ArH), 7.86–7.81 (m, 2H, ArH), 7.80 (d,  $J$  = 8.7 Hz, 1H, ArH), 7.65 (d,  $J$  = 8.6 Hz,

1H, ArH), 7.63–7.58 (m, 2H, ArH), 7.54 (dm,  $J$  = 7.9 Hz, 1H, ArH), 7.29 (dm,  $J$  = 8.4 Hz, 1H, ArH), 7.15 (ddd,  $J$  = 8.0, 7.0, 1.1, 1H, ArH), 7.00 (ddd,  $J$  = 8.0, 6.9, 1.2, 1H, ArH), 6.44 (ddd,  $J$  = 8.4, 7.1, 1.3, 1H, ArH), 6.31 (ddd,  $J$  = 8.4, 6.9, 1.4, 1H, ArH), 1.13–0.95 (m, 2H,  $\text{CH}_2$ ), 0.94–0.83 (m, 1H,  $\text{CH}_2$ ), 0.78–0.65 (m, 1H,  $\text{CH}_2$ ), 0.50 (t,  $J$  = 7.7 Hz, 3H,  $\text{CH}_3$ ), 0.28 ppm (t,  $J$  = 7.6 Hz, 3H,  $\text{CH}_3$ ).  $^{13}\text{C NMR}$  (101 MHz,  $\text{CD}_2\text{Cl}_2$ )  $\delta$  158.0, 138.9, 135.8, 134.2, 134.1, 132.51, 132.48, 131.6, 131.3, 130.4, 130.0, 129.1, 128.2, 127.77, 127.70, 127.47, 126.9, 126.7, 125.8, 125.8, 125.7, 124.6, 124.1, 123.8, 120.1, 10.3, 10.1. Signals corresponding to the C atoms bound to the

## SUPPORTING INFORMATION

B atom are not visible.  $^{11}\text{B}$  NMR (128 MHz,  $\text{CD}_2\text{Cl}_2$ ):  $\delta = 3.0$  ppm. HRMS (APCI)  $m/z$  calcd for  $\text{C}_{31}\text{H}_{27}\text{BN}$   $[\text{M}+\text{H}]^+$  424.2231, found: 424.2221.

**Method B:** Compound **H1-Br<sub>2</sub>** (30 mg, 57.1  $\mu\text{mol}$ , 1.00 eq.) was dissolved in toluene (2.5 mL) and  $\text{Et}_2\text{Zn}$  (1.1 M solution in toluene, 0.12 mL, 120  $\mu\text{mol}$ , 2.1 eq.) was added slowly under an inert atmosphere. The reaction mixture was stirred at 70 °C for 15 h and afterwards it was quenched with water. The phases were separated and extracted with  $\text{CH}_2\text{Cl}_2$ , washed with brine, dried over  $\text{MgSO}_4$ , filtered and the solvent was removed under reduced pressure. The residue was purified by flash column chromatography (silica, hexane/ $\text{EtOAc}$  95:5) to obtain compound **H1-Et<sub>2</sub>** (11 mg, 45%) as a light yellow solid.  $^1\text{H}$  NMR (400 MHz,  $\text{CDCl}_3$ ):  $\delta = 8.42$  (d,  $J = 5.9$  Hz, 1H, ArH), 7.94-7.97 (m, 3H, ArH), 7.82 (d,  $J = 8.6$  Hz, 1H, ArH), 7.77-7.74 (m, 2H, ArH), 7.65-7.61 (m, 2H, ArH), 7.58 (dm,  $J = 7.8$  Hz, 1H, ArH), 7.53 (dm,  $J = 7.9$  Hz, 1H, ArH), 7.28 (dm,  $J = 8.5$  Hz, 1H, ArH), 7.14 (ddd,  $J = 8.0, 7.0, 1.1$  Hz, 1H, ArH), 7.00 (ddd,  $J = 8.0, 6.9, 1.2$  Hz, 1H, ArH), 6.45 (ddd,  $J = 8.4, 7.0, 1.4$  Hz, 1H, ArH), 6.31 (ddd,  $J = 8.4, 6.9, 1.4$  Hz, 1H, ArH), 1.12-0.97 (m, 2H,  $\text{CH}_2$ ), 0.93-0.84 (m, 1H,  $\text{CH}_2$ ), 0.76-0.67 (m, 1H,  $\text{CH}_2$ ), 0.52 (t,  $J = 7.7$  Hz, 3H,  $\text{CH}_3$ ), 0.31 ppm (t,  $J = 7.6$  Hz, 3H,  $\text{CH}_3$ ). HRMS (APCI):  $m/z$  calcd for  $\text{C}_{31}\text{H}_{27}\text{BN}$   $[\text{M}+\text{H}]^+$  424.2231, found: 424.2226.

Synthesis of H1-Ph<sub>2</sub>.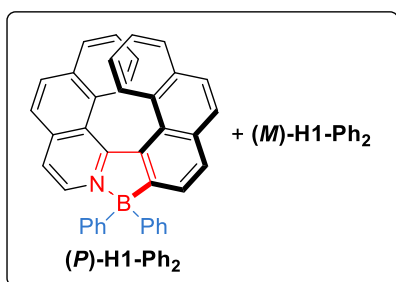

Compound **H1-Br<sub>2</sub>** (25.0 mg, 47.6  $\mu\text{mol}$ , 1.00 eq.) was dissolved in a mixture of  $\text{CH}_2\text{Cl}_2$  (1.5 mL) and toluene (1.5 mL) and  $\text{AlPh}_3$  (1 M solution in *n*-hexane, 200  $\mu\text{L}$ , 200  $\mu\text{mol}$ , 4.20 eq.) was added dropwise under an inert atmosphere. After the reaction was stirred at 90 °C for 4 h it was brought to room temperature and quenched with water. The phases were separated and the aqueous layer was extracted with  $\text{CH}_2\text{Cl}_2$ . The combined organic layers were washed with water and brine, dried over  $\text{MgSO}_4$ , filtered and the solvent was removed under reduced pressure. The crude product was purified via flash chromatography (silica,  $\text{CH}_2\text{Cl}_2$ /hexane 9:1) to obtain compound **H1-Ph<sub>2</sub>** (12 mg, 49%) as a yellow solid. **m.p.** 281 – 285 °C.  $^1\text{H}$  NMR (400 MHz,  $\text{CD}_2\text{Cl}_2$ ):  $\delta = 8.53$  (d,  $J = 5.9$  Hz, 1H, ArH), 8.02 (d,  $J = 8.7$  Hz, 1H, ArH), 8.00 (d,  $J = 7.7$  Hz, 1H, ArH), 7.96 (d,  $J = 7.6$  Hz, 1H, ArH), 7.82 (d,  $J = 8.7$  Hz, 1H, ArH), 7.80 (d,  $J = 5.8$  Hz, 1H, ArH) overlapping with 7.79 (d,  $J = 8.7$  Hz, 1H, ArH), 7.70–7.65 (m, 2H, ArH), 7.64 (dm,  $J = 7.9$  Hz, 1H, ArH), 7.56 (dm,  $J = 7.9$  Hz, 1H, ArH), 7.42–7.38 (m, 2H, ArH), 7.37–7.30 (m, 3H, ArH), 7.25–7.11 (m, 7H, ArH), 7.04 (ddd,  $J = 8.0, 7.0, 1.2$  Hz, 1H, ArH), 6.48 (ddd,  $J = 8.4, 7.1, 1.4$  Hz, 1H, ArH), 6.35 ppm (ddd,  $J = 8.4, 7.0, 1.4$  Hz, 1H, ArH).  $^{13}\text{C}$  NMR (101 MHz,  $\text{CD}_2\text{Cl}_2$ ):  $\delta = 159.0, 139.8, 137.6, 135.0, 134.0, 133.9, 133.8, 132.7, 132.6, 132.1, 130.4, 129.9, 129.4, 128.6, 128.4, 128.05, 128.03, 127.9, 127.63, 127.61, 127.01, 126.97, 126.4, 126.2, 126.1, 125.9, 124.58, 124.56, 123.9, 120.7$  ppm.  $^{11}\text{B}$  NMR (128 MHz,  $\text{CD}_2\text{Cl}_2$ ):  $\delta = 3.3$  ppm. HRMS (APCI)  $m/z$  calcd for  $\text{C}_{39}\text{H}_{27}\text{BN}$   $[\text{M}+\text{H}]^+$  520.2231, found: 520.2220.

**m.p.** 281 – 285 °C.  $^1\text{H}$  NMR (400 MHz,  $\text{CD}_2\text{Cl}_2$ ):  $\delta = 8.53$  (d,  $J = 5.9$  Hz, 1H, ArH), 8.02 (d,  $J = 8.7$  Hz, 1H, ArH), 8.00 (d,  $J = 7.7$  Hz, 1H, ArH), 7.96 (d,  $J = 7.6$  Hz, 1H, ArH), 7.82 (d,  $J = 8.7$  Hz, 1H, ArH), 7.80 (d,  $J = 5.8$  Hz, 1H, ArH) overlapping with 7.79 (d,  $J = 8.7$  Hz, 1H, ArH), 7.70–7.65 (m, 2H, ArH), 7.64 (dm,  $J = 7.9$  Hz, 1H, ArH), 7.56 (dm,  $J = 7.9$  Hz, 1H, ArH), 7.42–7.38 (m, 2H, ArH), 7.37–7.30 (m, 3H, ArH), 7.25–7.11 (m, 7H, ArH), 7.04 (ddd,  $J = 8.0, 7.0, 1.2$  Hz, 1H, ArH), 6.48 (ddd,  $J = 8.4, 7.1, 1.4$  Hz, 1H, ArH), 6.35 ppm (ddd,  $J = 8.4, 7.0, 1.4$  Hz, 1H, ArH).  $^{13}\text{C}$  NMR (101 MHz,  $\text{CD}_2\text{Cl}_2$ ):  $\delta = 159.0, 139.8, 137.6, 135.0, 134.0, 133.9, 133.8, 132.7, 132.6, 132.1, 130.4, 129.9, 129.4, 128.6, 128.4, 128.05, 128.03, 127.9, 127.63, 127.61, 127.01, 126.97, 126.4, 126.2, 126.1, 125.9, 124.58, 124.56, 123.9, 120.7$  ppm.  $^{11}\text{B}$  NMR (128 MHz,  $\text{CD}_2\text{Cl}_2$ ):  $\delta = 3.3$  ppm. HRMS (APCI)  $m/z$  calcd for  $\text{C}_{39}\text{H}_{27}\text{BN}$   $[\text{M}+\text{H}]^+$  520.2231, found: 520.2220.

Synthesis of 1,3-bis(benzo[*h*]isoquinolin-1-yl)benzene (TA).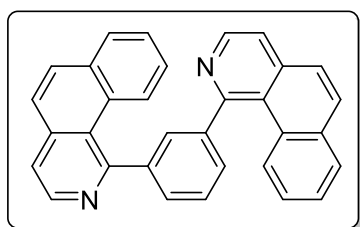

Compound **BIQ-Cl** (203 mg, 954  $\mu\text{mol}$ , 2.10 eq.) was dissolved in DME (3 mL) under an inert atmosphere and a solution of boronic acid ester **BEN-Bpin**<sup>[9]</sup> (150 mg, 455  $\mu\text{mol}$ , 1.00 eq.) in MeOH (1.5 mL) was added followed by a solution of  $\text{Na}_2\text{CO}_3$  (96.3 mg, 909  $\mu\text{mol}$ , 2.00 eq.) in water (1.5 mL). The mixture was degassed and subsequently,  $\text{Pd}(\text{PPh}_3)_4$  (8.60 mg, 13.6  $\mu\text{mol}$ , 0.03 eq.) was added. The reaction mixture was heated up to 80 °C. After 15 h the reaction was brought to room temperature, diluted with water and the mixture was extracted with  $\text{CH}_2\text{Cl}_2$ . The combined organic layers were washed with water and brine, dried over  $\text{MgSO}_4$ , filtered and the volatiles were removed under reduced pressure. The crude product was purified via column chromatography (silica, hexane/ $\text{EtOAc}$  3:2) to obtain compound **TA** (175 mg, 89%) as a colorless solid. **m.p.** 299 – 233 °C.  $^1\text{H}$  NMR (400 MHz,  $\text{CD}_2\text{Cl}_2$ ):  $\delta = 8.67$  (d,  $J = 5.2$  Hz, 2H, ArH), 8.44 (br s, 1H, ArH), 8.02–7.81 (m, 6H, ArH), 7.74 (d,  $J = 8.8$  Hz, 2H, ArH), 7.68 (d,  $J = 5.2$  Hz, 2H, ArH), 7.68–7.56 (m, 3H, ArH), 7.52 (t,  $J = 7.1$  Hz, 2H, ArH), 7.47–7.20 ppm (m, 2H, ArH).  $^{13}\text{C}$  NMR (101 MHz,  $\text{CD}_2\text{Cl}_2$ ):  $\delta = 158.9, 145.7, 144.0, 138.7, 134.1, 132.3, 130.0, 129.9, 129.5, 129.2, 128.7, 127.4, 126.5, 125.9, 124.3, 120.9$  ppm. HRMS (ESI)  $m/z$  calcd for  $\text{C}_{32}\text{H}_{21}\text{N}_2$   $[\text{M}+\text{H}]^+$  433.1699, found 433.1717.

chromatography (silica, hexane/ $\text{EtOAc}$  3:2) to obtain compound **TA** (175 mg, 89%) as a colorless solid. **m.p.** 299 – 233 °C.  $^1\text{H}$  NMR (400 MHz,  $\text{CD}_2\text{Cl}_2$ ):  $\delta = 8.67$  (d,  $J = 5.2$  Hz, 2H, ArH), 8.44 (br s, 1H, ArH), 8.02–7.81 (m, 6H, ArH), 7.74 (d,  $J = 8.8$  Hz, 2H, ArH), 7.68 (d,  $J = 5.2$  Hz, 2H, ArH), 7.68–7.56 (m, 3H, ArH), 7.52 (t,  $J = 7.1$  Hz, 2H, ArH), 7.47–7.20 ppm (m, 2H, ArH).  $^{13}\text{C}$  NMR (101 MHz,  $\text{CD}_2\text{Cl}_2$ ):  $\delta = 158.9, 145.7, 144.0, 138.7, 134.1, 132.3, 130.0, 129.9, 129.5, 129.2, 128.7, 127.4, 126.5, 125.9, 124.3, 120.9$  ppm. HRMS (ESI)  $m/z$  calcd for  $\text{C}_{32}\text{H}_{21}\text{N}_2$   $[\text{M}+\text{H}]^+$  433.1699, found 433.1717.

Synthesis of H2-Br<sub>4</sub>.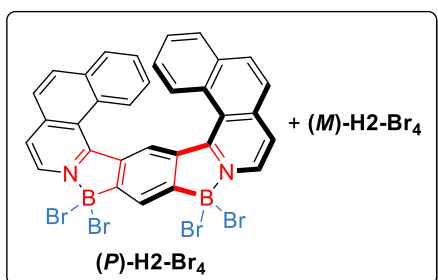

Oligoaryl **TA** (100 mg, 0.231  $\mu\text{mol}$ , 1.00 eq.) was dissolved in  $\text{CH}_2\text{Cl}_2$  (5 mL) under an inert atmosphere and *i*-Pr<sub>2</sub>NEt (823  $\mu\text{L}$ , 0.462  $\mu\text{mol}$ , 2.00 eq.) was added. The mixture was cooled to 0 °C and  $\text{BBr}_3$  (143  $\mu\text{L}$ , 1.50 mmol, 6.50 eq.) was added dropwise. The reaction mixture was brought to room temperature and it was stirred for 48 h at this temperature. Subsequently, the reaction was quenched with saturated aqueous  $\text{K}_2\text{CO}_3$  solution and the precipitated solid was filtered off. The mixture was diluted with  $\text{CH}_2\text{Cl}_2$  and water. The phases were separated and the aqueous phase was extracted with  $\text{CH}_2\text{Cl}_2$ . The combined organic layers were washed with water and brine, dried over  $\text{MgSO}_4$ , filtered and the volatiles were removed under reduced pressure. The crude product was used in the next step without any further purification.

HRMS (APCI)  $m/z$  calcd for  $\text{C}_{32}\text{H}_{18}\text{B}_2\text{Br}_4\text{N}_2$   $\text{M}^+$  767.8384, found 767.8416.



## SUPPORTING INFORMATION

Synthesis of H2-Me<sub>4</sub>.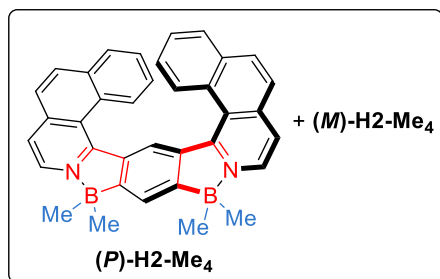

Compound **H2-Br<sub>4</sub>** (64.0 mg, 82.7 μmol, 1.00 eq.) was dissolved in a mixture of CH<sub>2</sub>Cl<sub>2</sub> (1.5 mL) and toluene (1.5 mL) and AlMe<sub>3</sub> (2 M solution in *n*-hexane, 174 μL, 347 μmol, 4.20 eq.) was added dropwise under an inert atmosphere. The reaction was stirred for 4 h and quenched with water. The phases were separated and the aqueous layer was extracted with CH<sub>2</sub>Cl<sub>2</sub>. The combined organic layers were washed with water and brine, dried over MgSO<sub>4</sub>, filtered and the solvent was removed and under reduced pressure. The crude product was purified via flash chromatography (silica, CH<sub>2</sub>Cl<sub>2</sub>/hexane 3:2) to obtain compound **H2-Me<sub>4</sub>** (29 mg, 68%) as a yellow solid. **m.p.** 246–249 °C (decomposition). **<sup>1</sup>H NMR** (400 MHz, CD<sub>2</sub>Cl<sub>2</sub>): δ = 10.05 (d, *J* = 0.8 Hz, 1H, ArH), 8.61 (d, *J* = 8.3 Hz, 2H, ArH), 8.43 (d, *J* = 5.9 Hz, 2H, ArH), 8.05 (d, *J* = 8.6 Hz, 2H, ArH),

8.00 (d, *J* = 0.8 Hz, 1H, ArH), 7.83 (dd, *J* = 8.0 Hz, 1.3 Hz, 2H, ArH), 7.73 (d, *J* = 8.7 Hz, 2H, ArH), 7.68 (d, *J* = 6.0 Hz, 2H, ArH), 7.24 (ddd, *J* = 8.1, 7.0, 1.1, 2H, ArH), 6.52 (ddd, *J* = 8.4, 7.1, 1.4, 2H, ArH), 0.20 ppm (s, 12H, CH<sub>3</sub>). **<sup>13</sup>C NMR** (100 MHz, CD<sub>2</sub>Cl<sub>2</sub>): δ = 156.3, 139.6, 136.7, 135.2, 133.9, 133.7, 129.6, 129.1, 128.6, 128.5, 127.9, 125.0, 124.9, 124.2, 121.0, 119.9 ppm. Signals corresponding to the C atoms bound to the B atoms are not visible. **<sup>11</sup>B NMR** (128 MHz, CD<sub>2</sub>Cl<sub>2</sub>): δ = 0.3 ppm. **HRMS** (APCI) *m/z* calcd for C<sub>36</sub>H<sub>31</sub>B<sub>2</sub>N<sub>2</sub> [M+H]<sup>+</sup> 513.2668, found: 513.2661.

Synthesis of H2-Et<sub>4</sub>.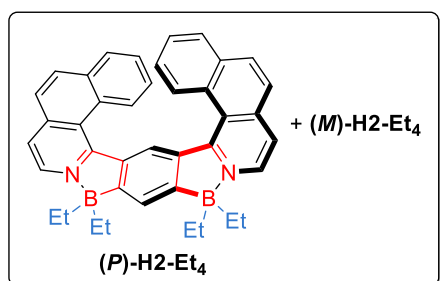

Compound **H2-Br<sub>4</sub>** (50.0 mg, 64.8 μmol, 1.00 eq) was dissolved in a mixture of CH<sub>2</sub>Cl<sub>2</sub> (1 mL) and toluene (1 mL) and AlEt<sub>3</sub> (1 M solution in *n*-hexane, 583 μL, 583 μmol, 4.50 eq.) was added dropwise under an inert atmosphere. The reaction was stirred for 2 h and subsequently quenched with water. The phases were separated and the aqueous layer was extracted with CH<sub>2</sub>Cl<sub>2</sub>. The combined organic layers were washed with water and brine, dried over MgSO<sub>4</sub>, filtered and the solvent was removed and under reduced pressure. The crude product was purified via flash chromatography (silica, CH<sub>2</sub>Cl<sub>2</sub>/hexane 95:5) to obtain compound **H2-Et<sub>4</sub>** (24 mg, 65%) as a yellow solid. **<sup>1</sup>H NMR** (400 MHz, CDCl<sub>3</sub>): δ = 10.00 (d, *J* = 0.7 Hz, 1H, ArH), 8.66 (d, *J* = 8.6 Hz, 2H, ArH), 8.33 (d, *J* = 5.9 Hz, 2H, ArH), 8.04 (d, *J* = 0.8 Hz, 1H, ArH), 8.00 (d, *J* = 8.6 Hz,

2H, ArH), 7.79 (dm, *J* = 7.9 Hz, 2H, ArH), 7.69 (d, *J* = 8.7 Hz, 2H, ArH), 7.59 (d, *J* = 6.0 Hz, 2H, ArH), 7.22 (ddd, *J* = 8.0, 7.1, 1.1 Hz, 2H, ArH), 6.55 (ddd, *J* = 8.4, 7.1, 1.3 Hz, 2H, ArH), 1.09–0.93 (m, 4H, CH<sub>2</sub>), 0.77–0.66 (m, 4H, CH<sub>2</sub>), 0.59 (t, *J* = 7.4 Hz, 12H, CH<sub>3</sub>). **HRMS** (APCI): *m/z* calcd for C<sub>40</sub>H<sub>39</sub>B<sub>2</sub>N<sub>2</sub> [M+H]<sup>+</sup> 569.3294, found: 569.3303. The compound is unstable.

Synthesis of H2-Ph<sub>4</sub>.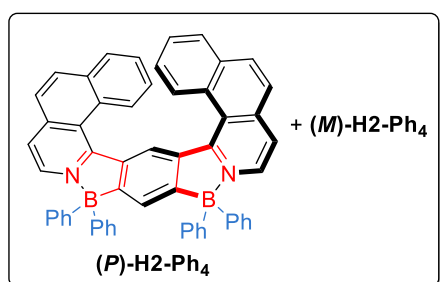

Compound **H2-Br<sub>4</sub>** (100 mg, 129 μmol, 1.00 eq) was dissolved in a mixture of CH<sub>2</sub>Cl<sub>2</sub> (2.5 mL) and toluene (2.5 mL) and AlPh<sub>3</sub> (1 M solution in *n*-hexane, 543 μL, 543 μmol, 4.20 eq.) was added dropwise under an inert atmosphere. After the reaction was stirred for 4 h at 90 °C it was brought to room temperature and quenched with water. The phases were separated and the aqueous layer was extracted with CH<sub>2</sub>Cl<sub>2</sub>. The combined organic layers were washed with water and brine, dried over MgSO<sub>4</sub>, filtered and the solvent was removed under reduced pressure. The crude product was purified via flash chromatography (silica, CH<sub>2</sub>Cl<sub>2</sub>/hexane 85:15) to obtain compound **H2-Ph<sub>4</sub>** (65 mg, 66%) as a yellow solid. **m.p.** > 400 °C. **<sup>1</sup>H NMR** (400 MHz, CD<sub>2</sub>Cl<sub>2</sub>): δ = 10.16 (d, *J* = 0.6 Hz, 1H, ArH), 8.64 (d, *J* = 8.4 Hz, 2H, ArH), 8.42 (d, *J* = 6.0 Hz, 2H, ArH),

8.17 (d, *J* = 0.7 Hz, 1H, ArH), 8.10 (d, *J* = 8.6 Hz, 2H, ArH), 7.86 (dd, *J* = 8.0, 1.2 Hz, 2H, ArH), 7.75 (d, *J* = 8.7 Hz, 2H, ArH), 7.69 (d, *J* = 6.1 Hz, 2H, ArH), 7.39–7.06 (m, 22H, ArH), 6.59 ppm (ddd, *J* = 8.4, 7.1, 1.3, 2H, ArH). **<sup>13</sup>C NMR** (100 MHz, CD<sub>2</sub>Cl<sub>2</sub>): δ = 157.7, 140.3, 138.4, 136.7, 134.8, 133.8, 132.9, 129.5, 128.8, 128.4, 128.2, 127.9, 126.1, 125.3, 124.9, 124.5, 121.0, 120.4 ppm. Signals corresponding to the C atoms bound to the B atoms are not visible. **<sup>11</sup>B NMR** (128 MHz, CD<sub>2</sub>Cl<sub>2</sub>): δ = 4.6 ppm. **HRMS** (APCI) *m/z* calcd for C<sub>56</sub>H<sub>39</sub>B<sub>2</sub>N<sub>2</sub> [M+H]<sup>+</sup> 761.3294, found 761.3260.



## SUPPORTING INFORMATION

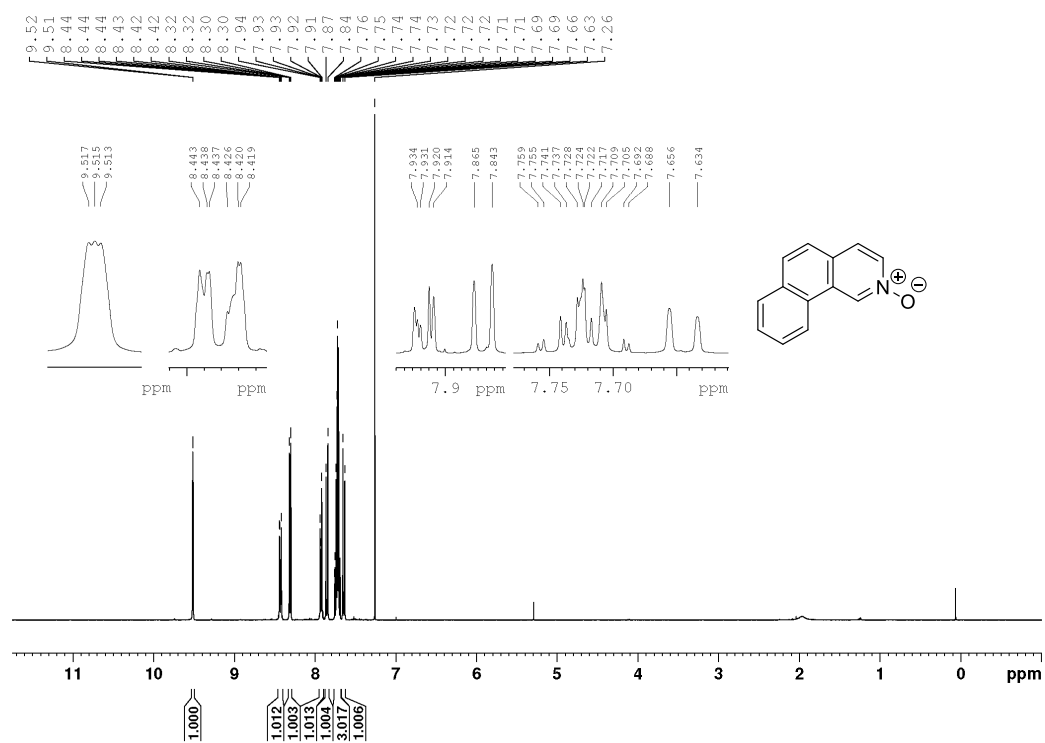

**Figure S3.**  $^1\text{H}$  NMR of compound **BIQ-NOx** (400 MHz,  $\text{CDCl}_3$ , 25  $^\circ\text{C}$ ).

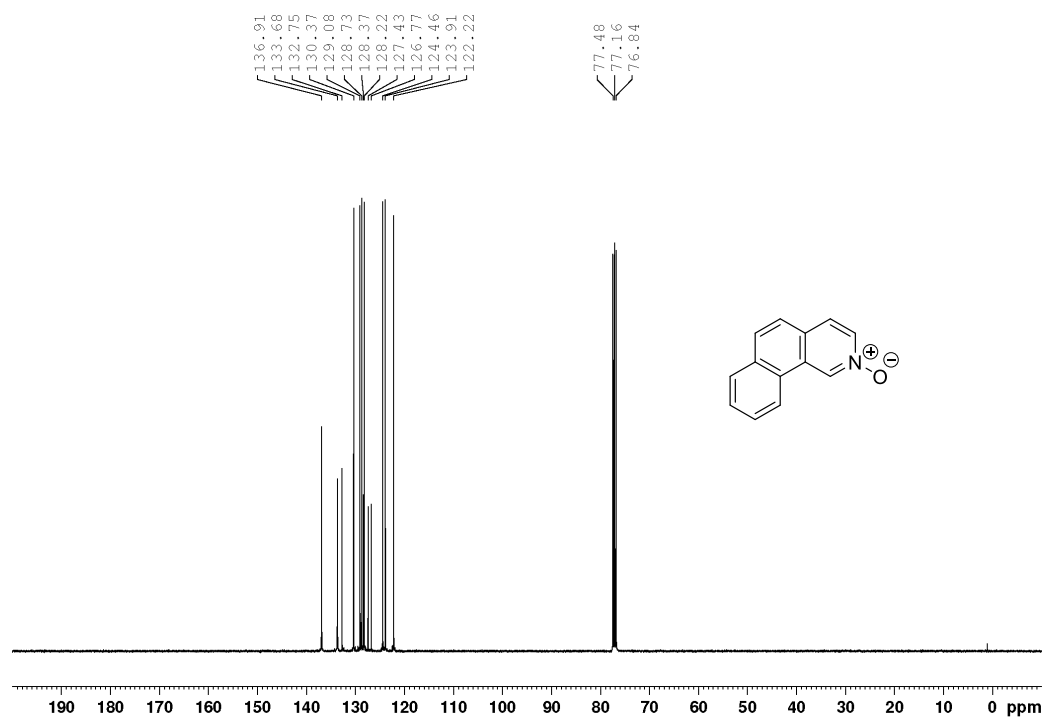

**Figure S4.**  $^{13}\text{C}$  NMR of compound **BIQ-NOx** (101 MHz,  $\text{CDCl}_3$ , 25  $^\circ\text{C}$ ).

## SUPPORTING INFORMATION

JG07-2017-05-29-1 #60-79 RT: 0.62-0.82 AV: 20 NL: 2.05E9

T: FTMS + p APCI corona Full ms [100.0000-500.0000]

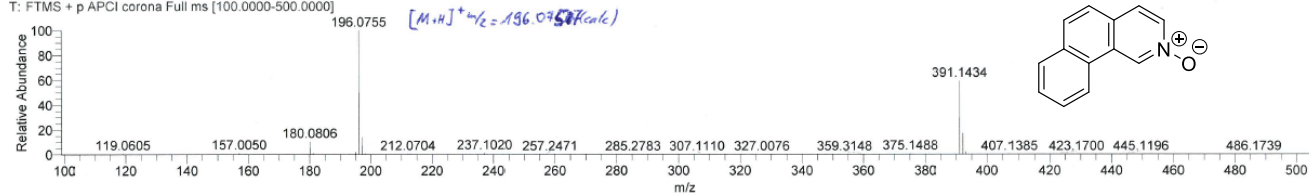

JG07-2017-05-29-1 #60-79 RT: 0.62-0.82 AV: 20 NL: 1.21E9

T: FTMS + p APCI corona Full ms [100.0000-500.0000]

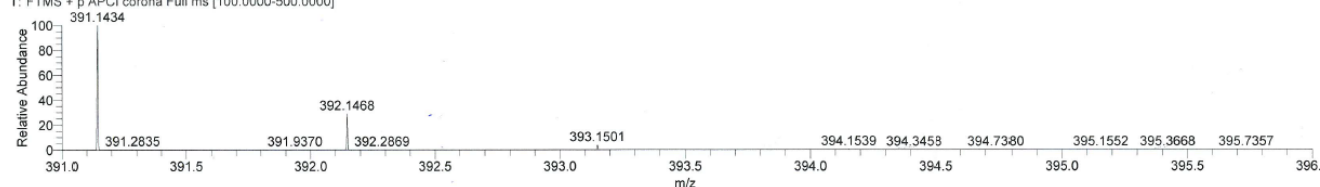

C26H18N2O2 +H: C26 H19 N2 O2 pa Chrg 1

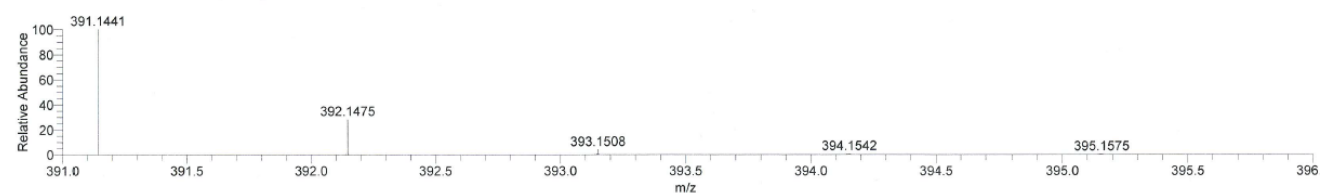

Figure S5. HRMS (APCI) spectrum of compound BIQ-NOx.

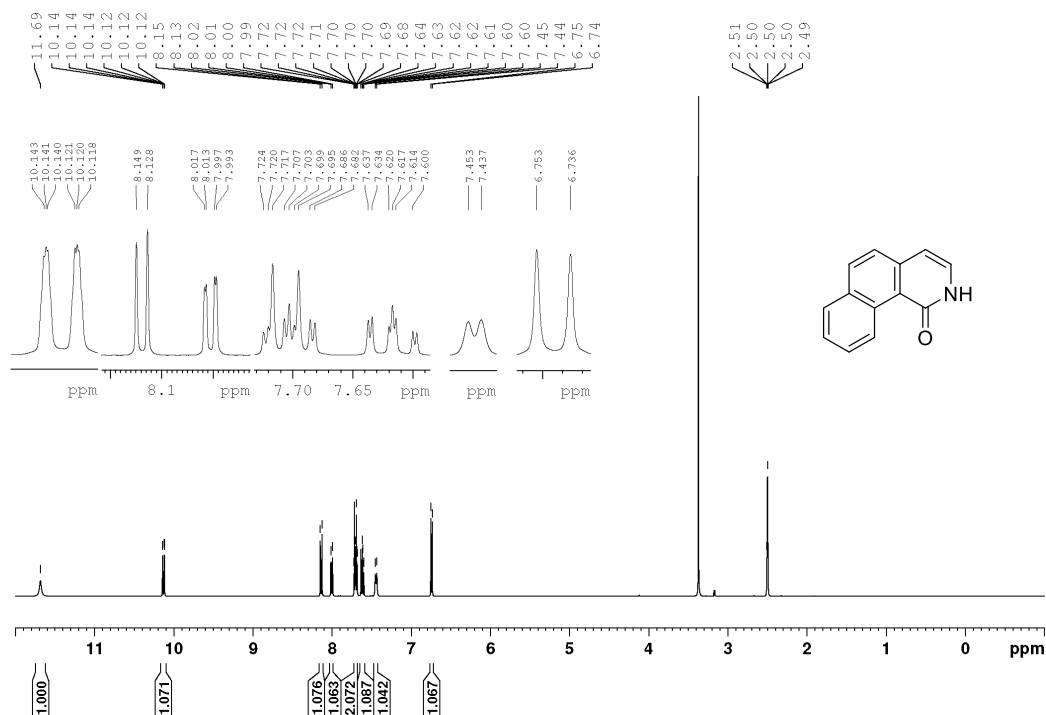Figure S6. <sup>1</sup>H NMR of compound 4 (400 MHz, DMSO-d<sub>6</sub>, 25 °C).

## SUPPORTING INFORMATION

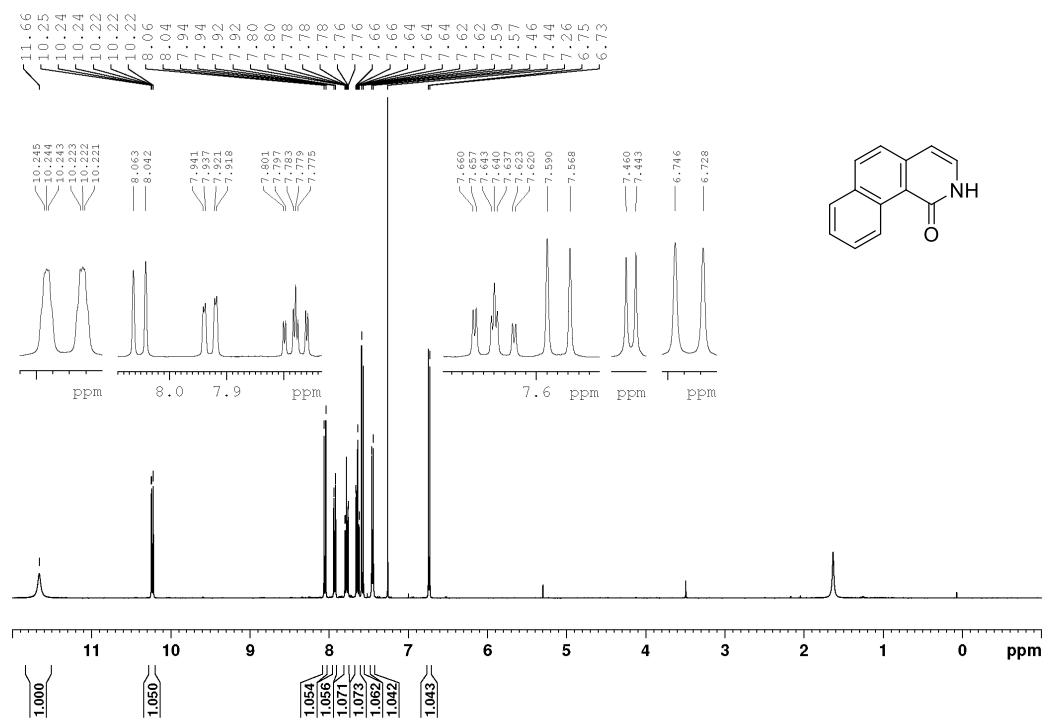

Figure S7. <sup>1</sup>H NMR of compound 4 (400 MHz, CDCl<sub>3</sub>, 25 °C).

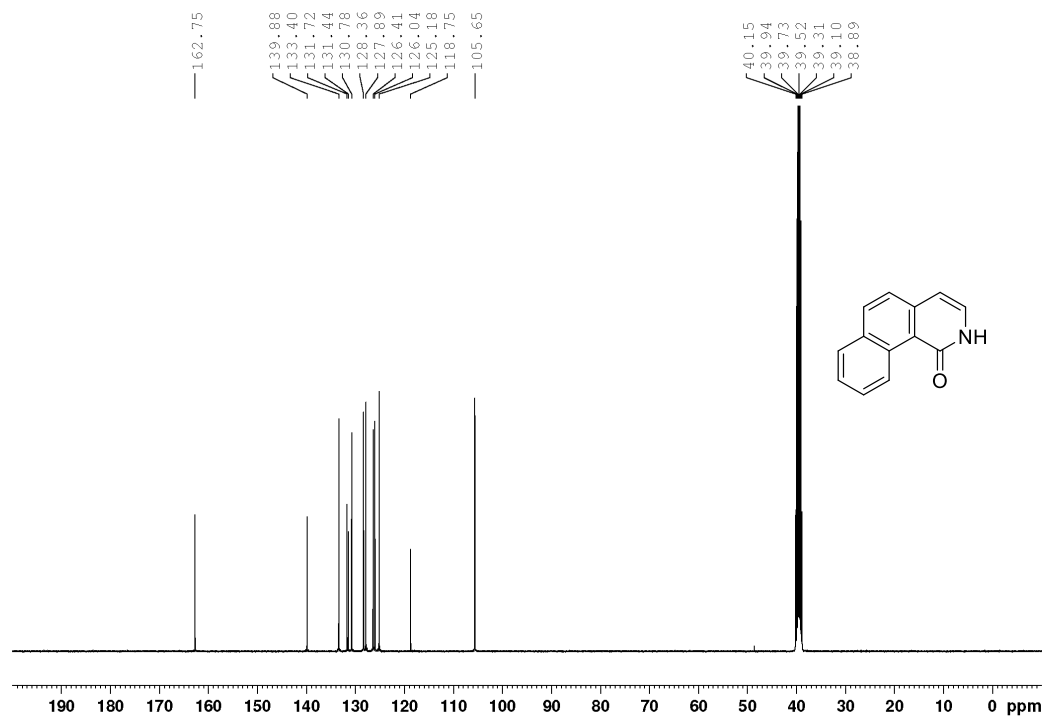

Figure S8. <sup>13</sup>C NMR of compound 4 (101 MHz, DMSO-*d*<sub>6</sub>, 25 °C).

## SUPPORTING INFORMATION

JG09-2017-05-29-1 #63-80 RT: 0.65-0.83 AV: 18 NL: 2.60E9  
T: FTMS + p APCI corona Full ms [100.0000-500.0000]

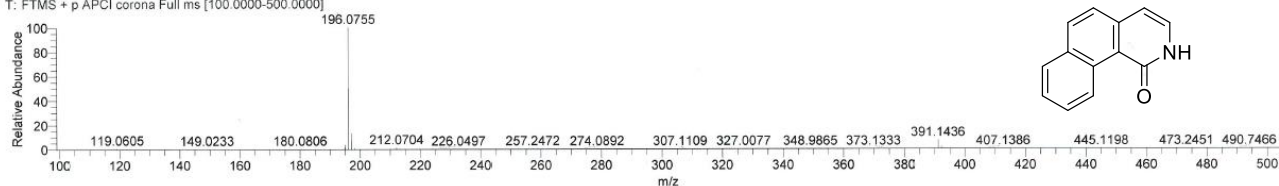

JG09-2017-05-29-1 #63-80 RT: 0.65-0.83 AV: 18 NL: 1.84E8  
T: FTMS + p APCI corona Full ms [100.0000-500.0000]

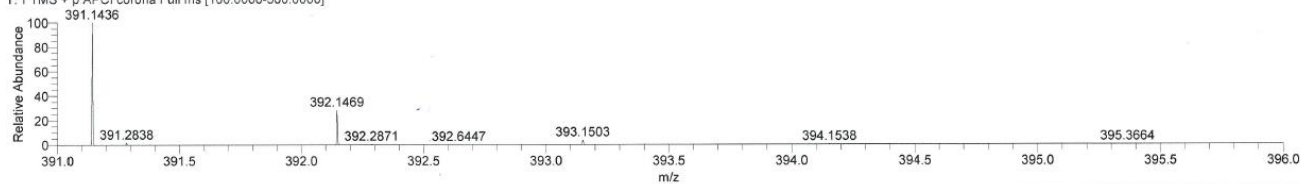

C26H18N2O2 +H: C26 H19 N2 O2 pa Chrg 1

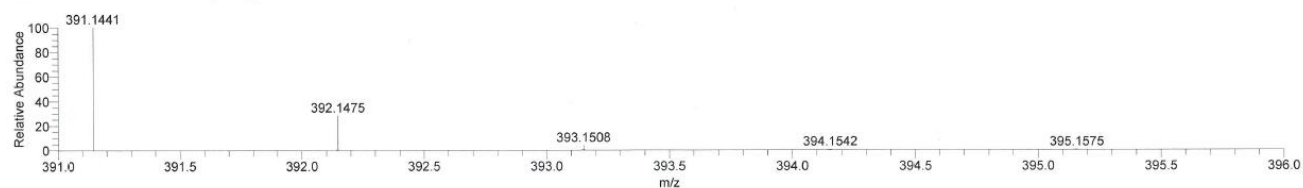

Figure S9. HRMS (APCI) spectrum of compound 4.

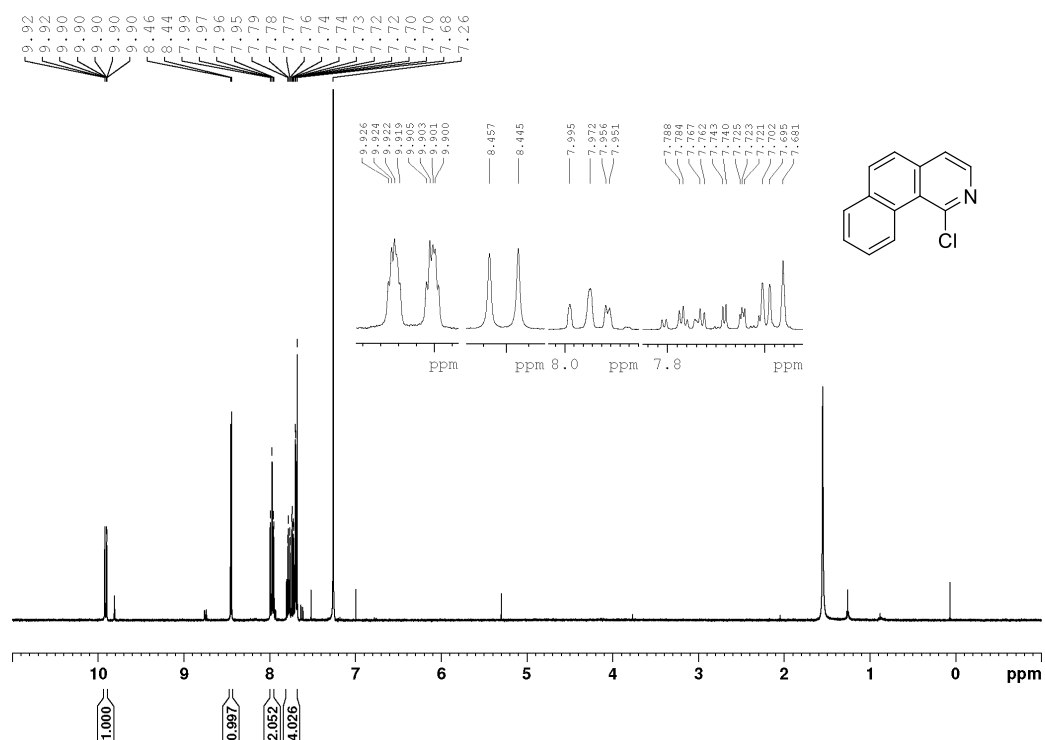

Figure S10.  $^1\text{H}$  NMR of compound **BIQ-Cl** (method A) (400 MHz,  $\text{CDCl}_3$ , 25  $^\circ\text{C}$ ).

## SUPPORTING INFORMATION

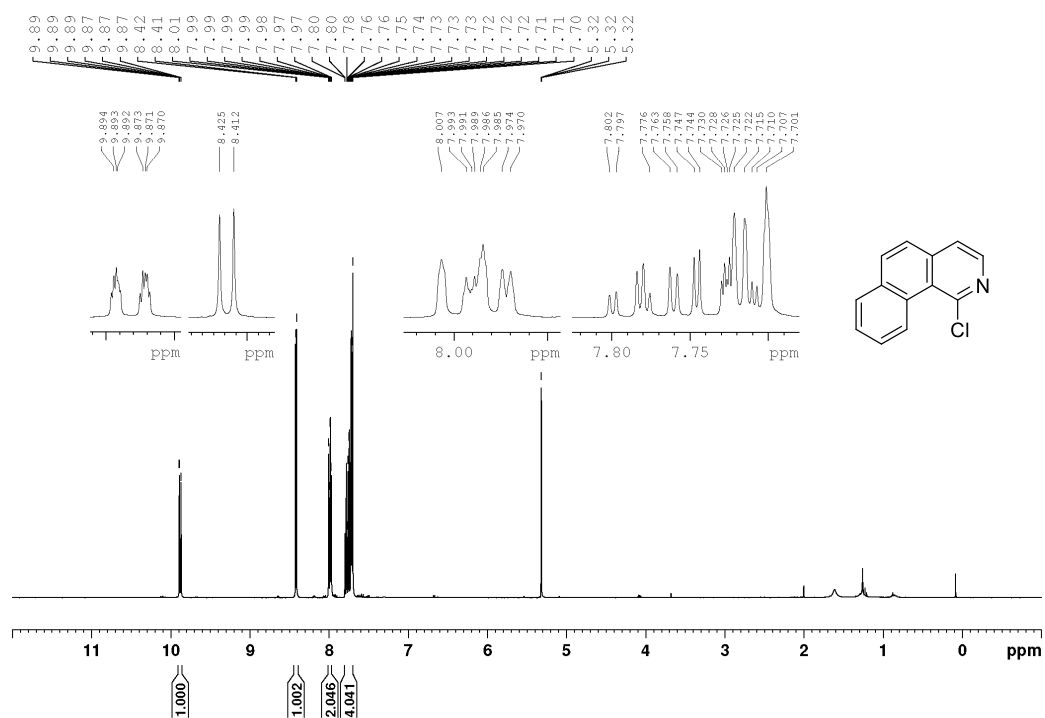

Figure S11. <sup>1</sup>H NMR of compound BIQ-Cl (method B) (400 MHz, CD<sub>2</sub>Cl<sub>2</sub>, 25 °C).

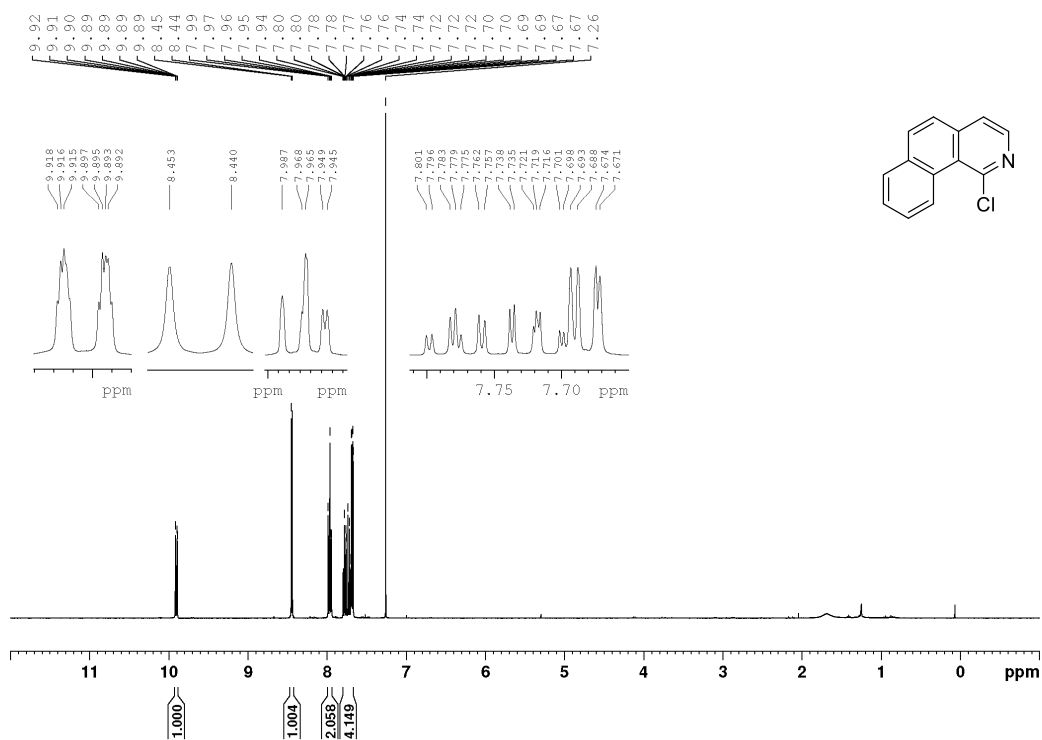

Figure S12. <sup>1</sup>H NMR of compound BIQ-Cl (method B) (400 MHz, CDCl<sub>3</sub>, 25 °C).

## SUPPORTING INFORMATION

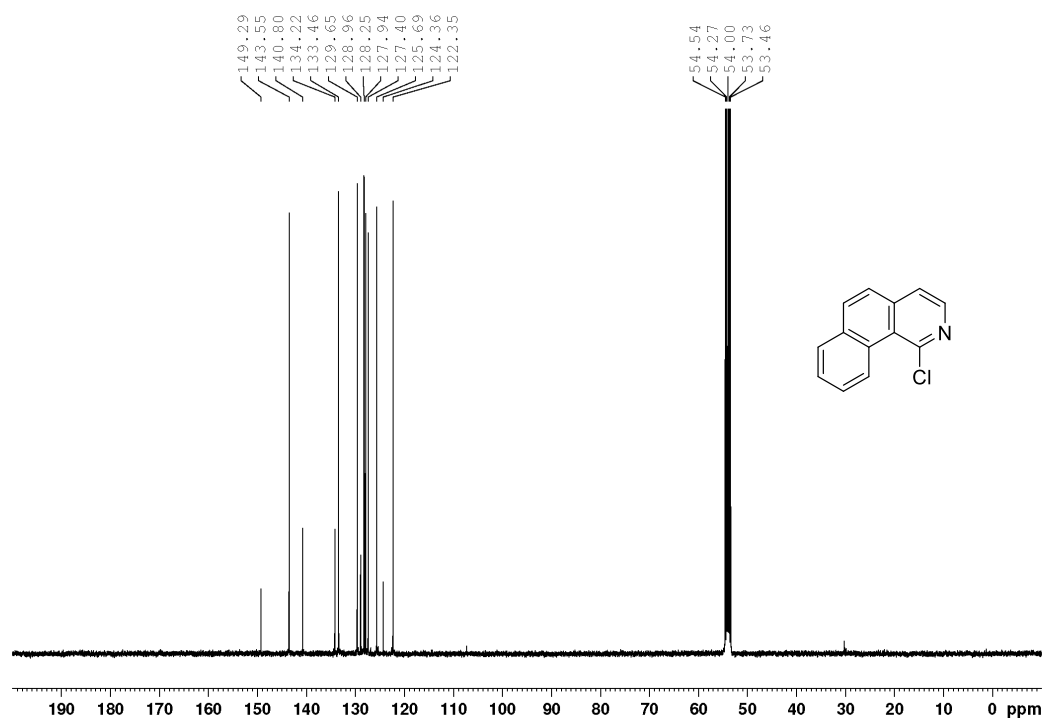

Figure S13.  $^{13}\text{C}$  NMR of compound BIQ-Cl (method B) (101 MHz,  $\text{CD}_2\text{Cl}_2$ , 25 °C).

## Acquisition Parameter

|             |            |                 |           |                  |           |
|-------------|------------|-----------------|-----------|------------------|-----------|
| Source Type | ESI        | Ion Polarity    | Positive  | Set Nebulizer    | 0.2 Bar   |
| Focus       | Not active | Set Funnel 1 RF | 70.0 Vpp  | Set Dry Heater   | 200 °C    |
| Scan Begin  | 50 m/z     | Set Funnel 2 RF | 120.0 Vpp | Set Dry Gas      | 4.0 l/min |
| Scan End    | 2500 m/z   | Set Hexapole RF | 120.0 Vpp | Set Divert Valve | Source    |

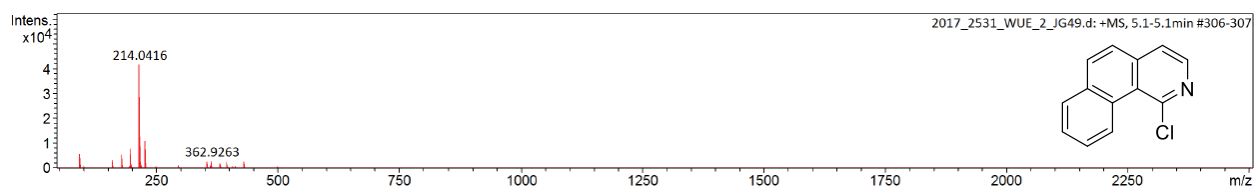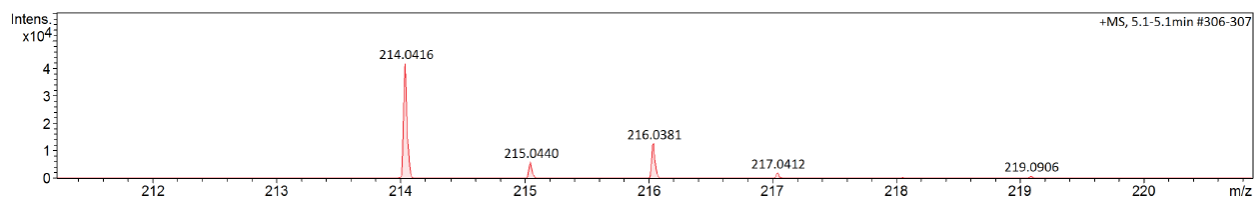

| Meas. m/z | # | Ion Formula                        | m/z      | err [ppm] | mSigma | # mSigma | Score  | rdb | e <sup>-</sup> Conf | N-Rule |
|-----------|---|------------------------------------|----------|-----------|--------|----------|--------|-----|---------------------|--------|
| 214.0416  | 1 | C <sub>13</sub> H <sub>9</sub> ClN | 214.0418 | 0.9       | 15.9   | 1        | 100.00 | 9.5 | even                | ok     |

Figure S14. HRMS (ESI) of compound BIQ-Cl (method B).



## SUPPORTING INFORMATION

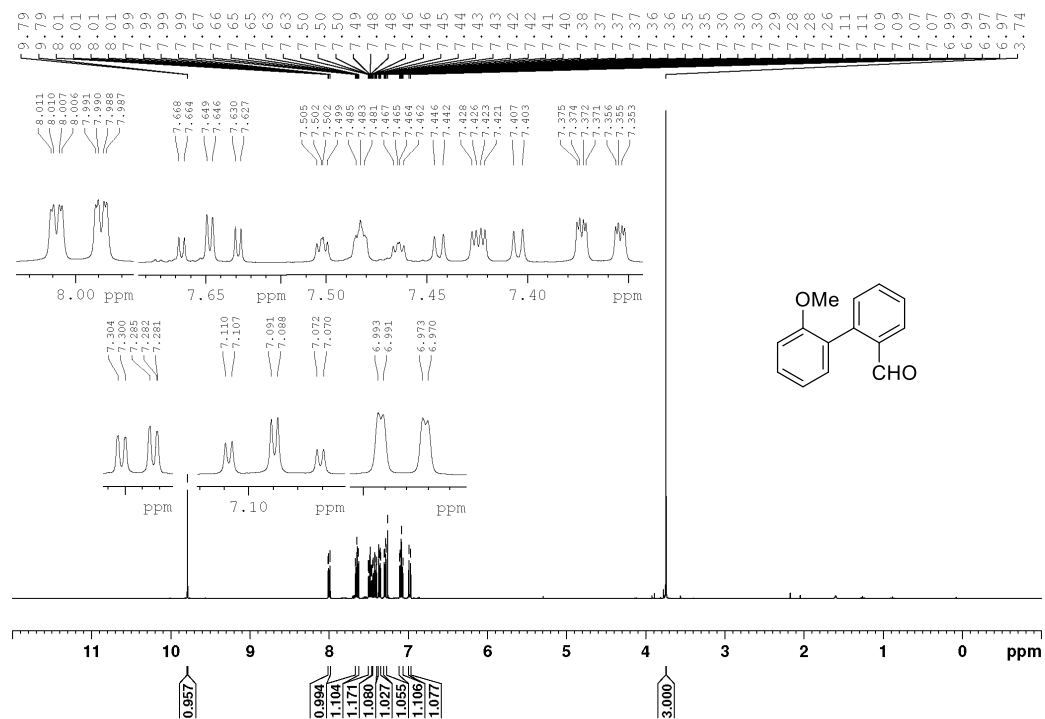Figure S15. <sup>1</sup>H NMR of compound 7 (400 MHz, CDCl<sub>3</sub>, 25 °C).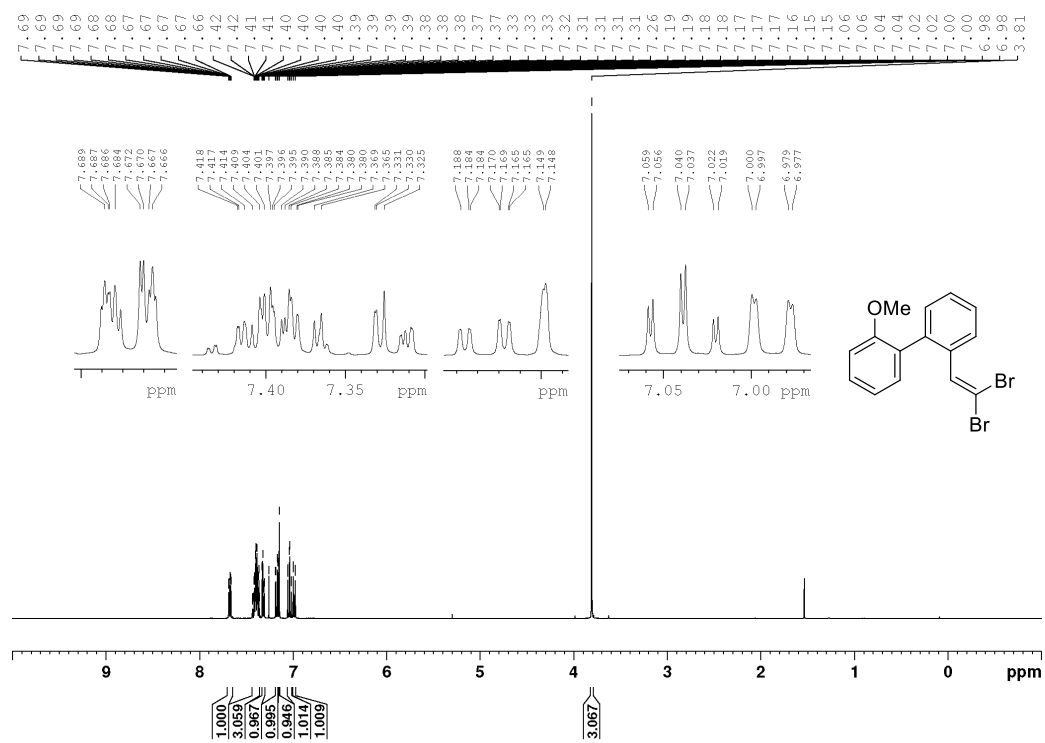Figure S16. <sup>1</sup>H NMR of compound 8 (400 MHz, CDCl<sub>3</sub>, 25 °C).

## SUPPORTING INFORMATION

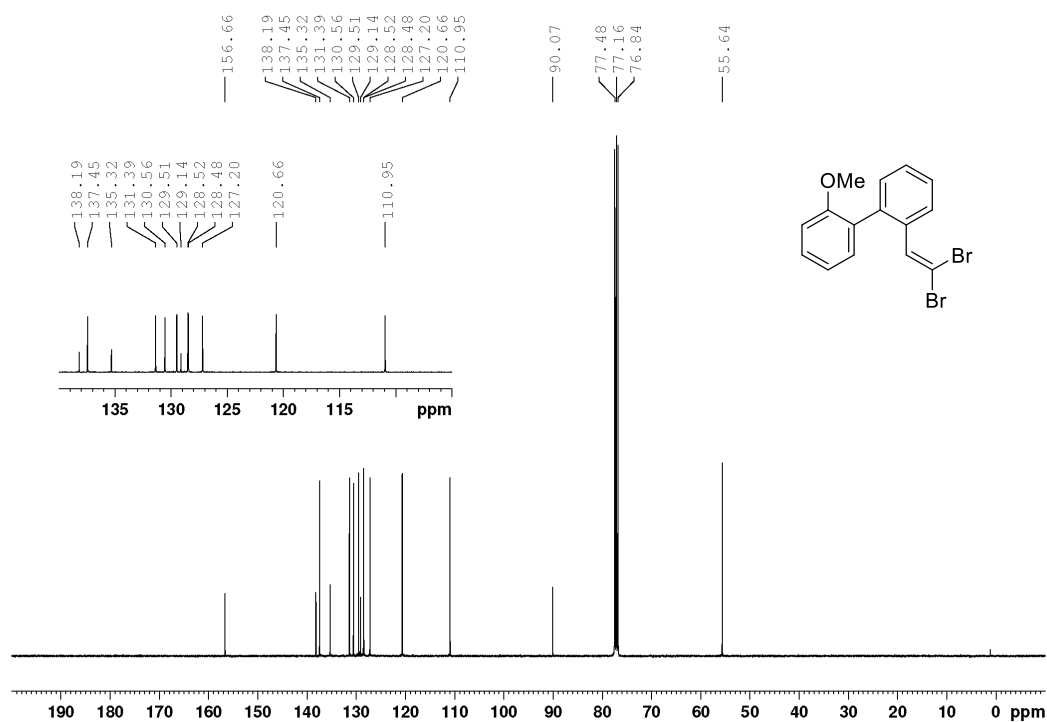Figure S17. <sup>13</sup>C NMR of compound 8 (101 MHz, CDCl<sub>3</sub>, 25 °C).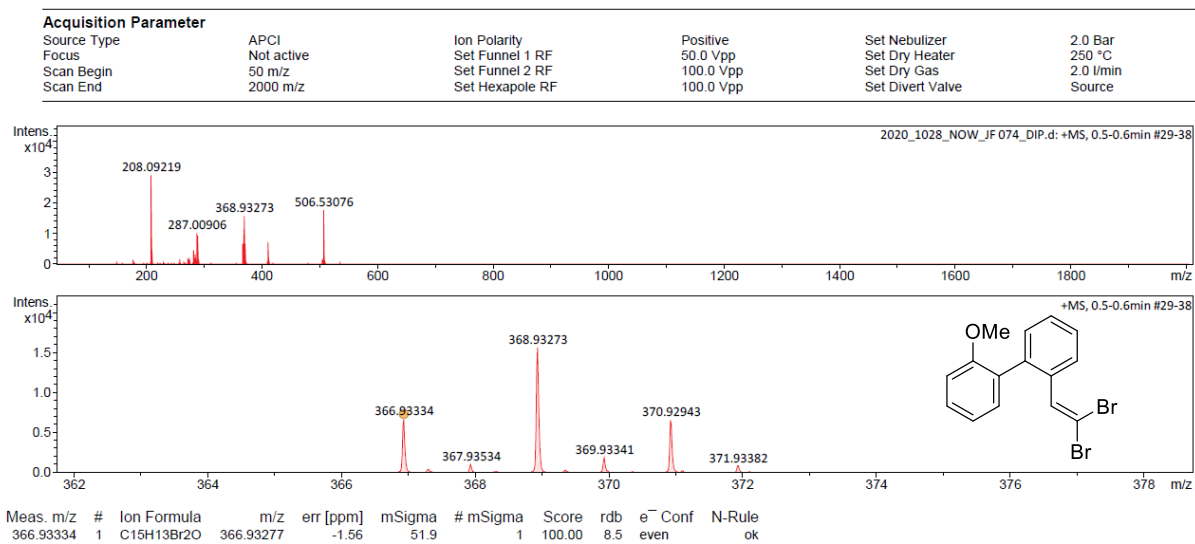

Figure S18. HRMS (APCI) of compound 8.

## SUPPORTING INFORMATION

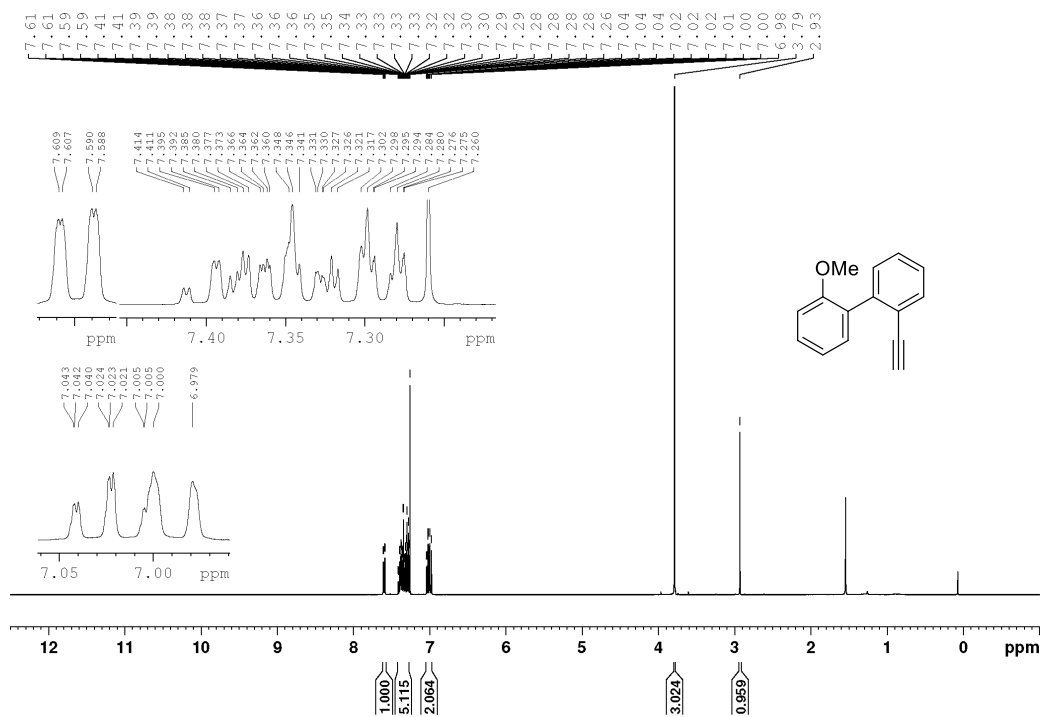

Figure S19. <sup>1</sup>H NMR of compound **9** (400 MHz, CDCl<sub>3</sub>, 25 °C).

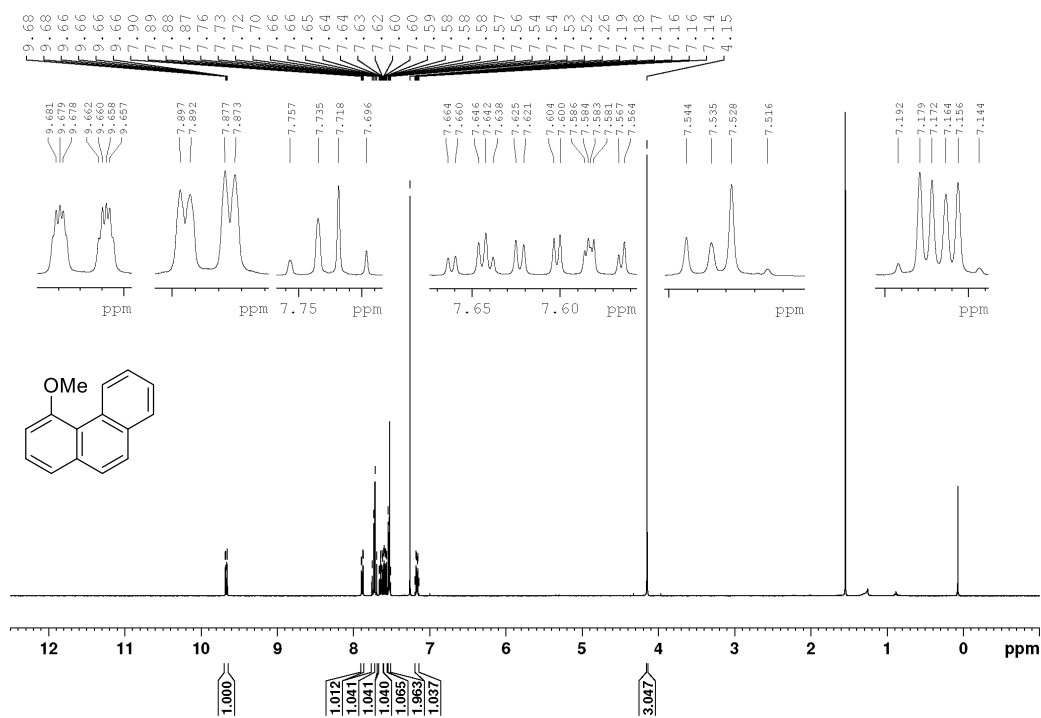

Figure S20. <sup>1</sup>H NMR of compound **PHE-OMe** (400 MHz, CDCl<sub>3</sub>, 25 °C).







## SUPPORTING INFORMATION

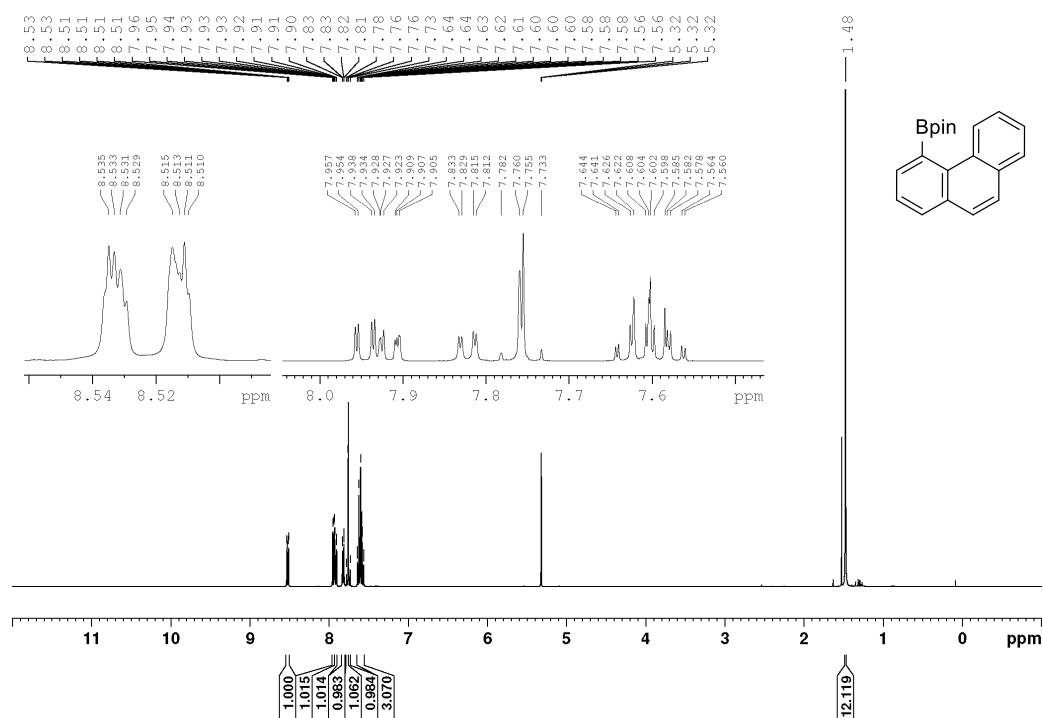

Figure S27. <sup>1</sup>H NMR of compound PHE-Bpin (400 MHz, CD<sub>2</sub>Cl<sub>2</sub>, 25 °C).

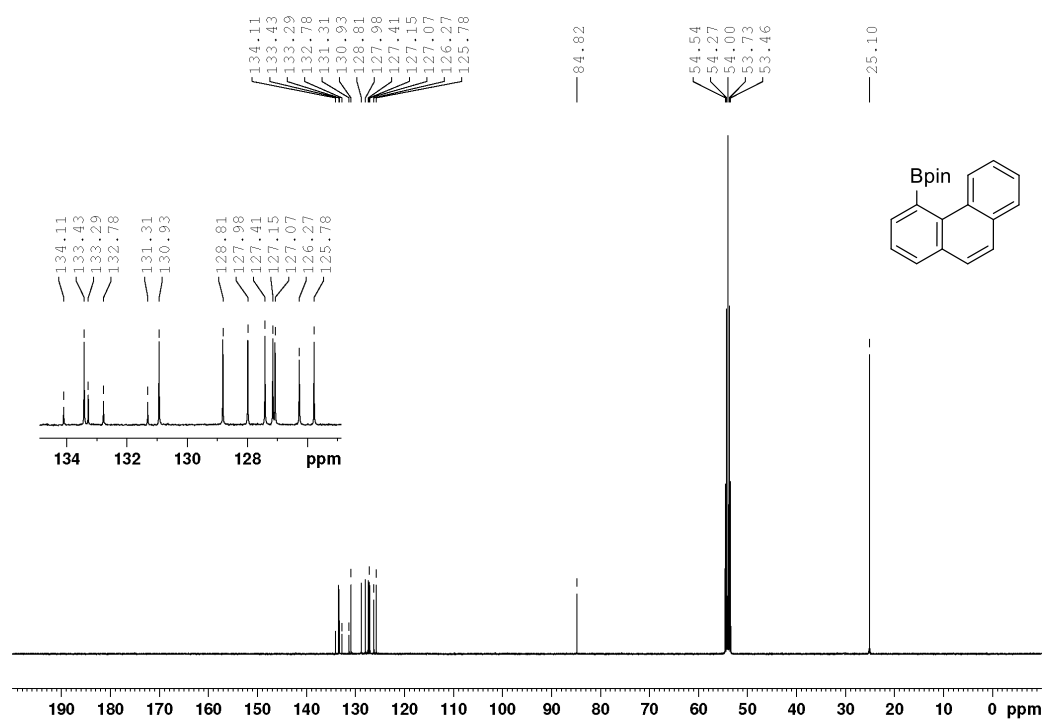

Figure S28. <sup>13</sup>C NMR of compound PHE-Bpin (101 MHz, CD<sub>2</sub>Cl<sub>2</sub>, 25 °C).

## SUPPORTING INFORMATION

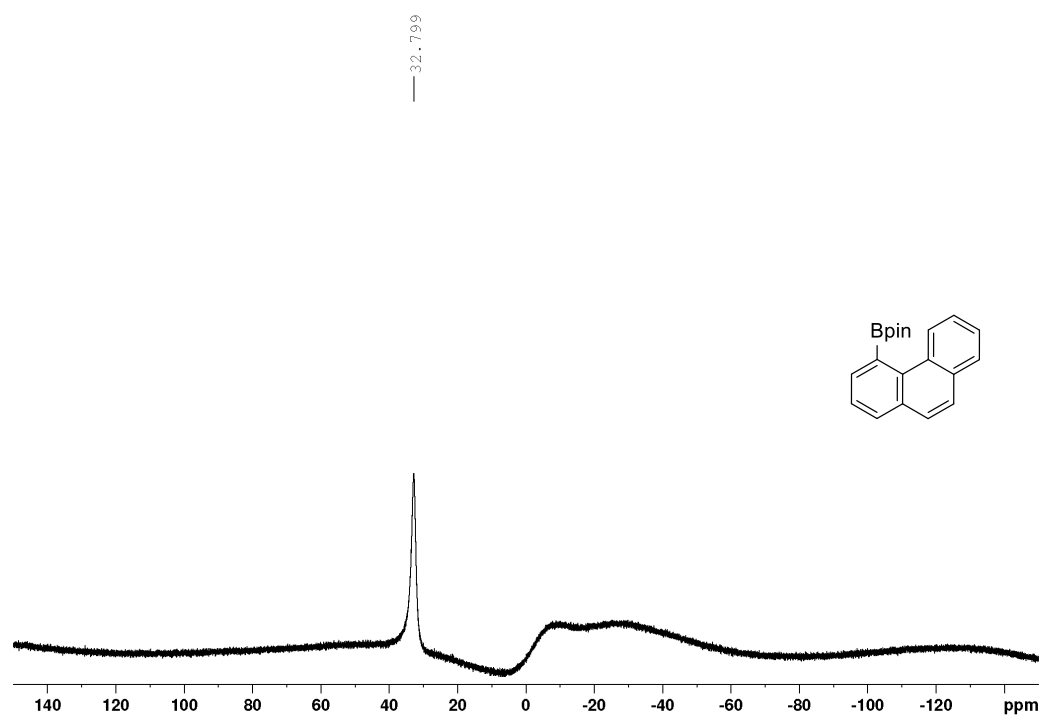

Figure S29.  $^{11}\text{B}$  NMR of compound PHE-Bpin (128 MHz,  $\text{CD}_2\text{Cl}_2$ , 25 °C)

## Acquisition Parameter

|             |            |                 |           |                  |           |
|-------------|------------|-----------------|-----------|------------------|-----------|
| Source Type | ESI        | Ion Polarity    | Positive  | Set Nebulizer    | 0.3 Bar   |
| Focus       | Not active | Set Funnel 1 RF | 100.0 Vpp | Set Dry Heater   | 200 °C    |
| Scan Begin  | 50 m/z     | Set Funnel 2 RF | 200.0 Vpp | Set Dry Gas      | 4.0 l/min |
| Scan End    | 2500 m/z   | Set Hexapole RF | 200.0 Vpp | Set Divert Valve | Source    |

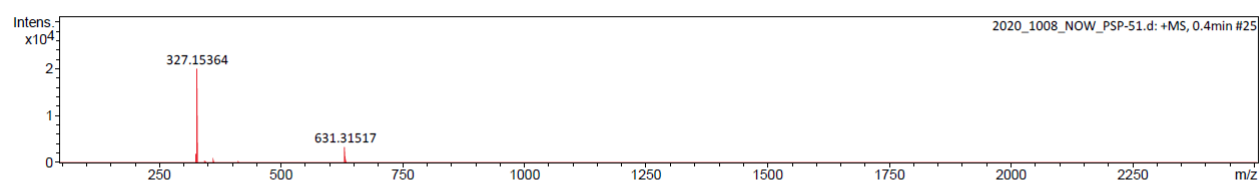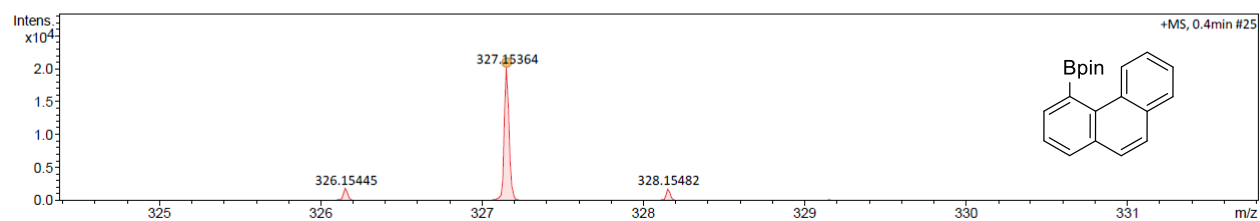

| Meas. m/z | # | Ion Formula                                       | m/z       | err [ppm] | mSigma | # mSigma | Score  | rdb  | e <sup>-</sup> Conf | N-Rule |
|-----------|---|---------------------------------------------------|-----------|-----------|--------|----------|--------|------|---------------------|--------|
| 327.15364 | 1 | C <sub>20</sub> H <sub>21</sub> BNaO <sub>2</sub> | 327.15268 | -1.81     | 97.6   | 1        | 100.00 | 10.5 | even                | ok     |

Figure S30. HRMS (ESI) spectrum of compound PHE-Bpin.



## SUPPORTING INFORMATION

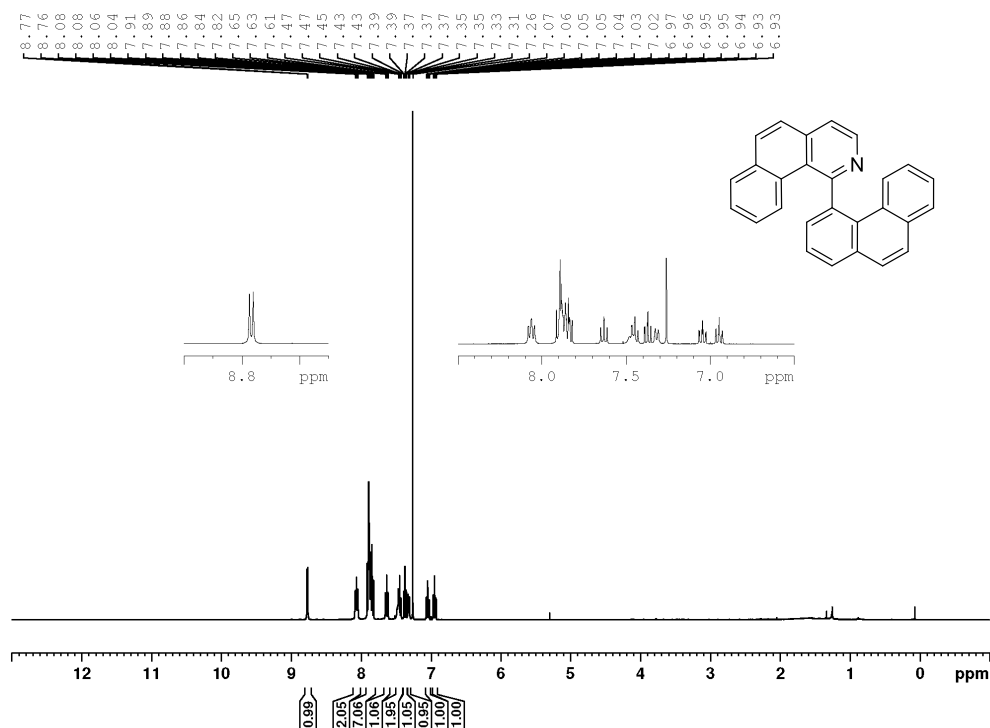Figure S31. <sup>1</sup>H NMR of compound BA (400 MHz, CDCl<sub>3</sub>, 25 °C) (method A).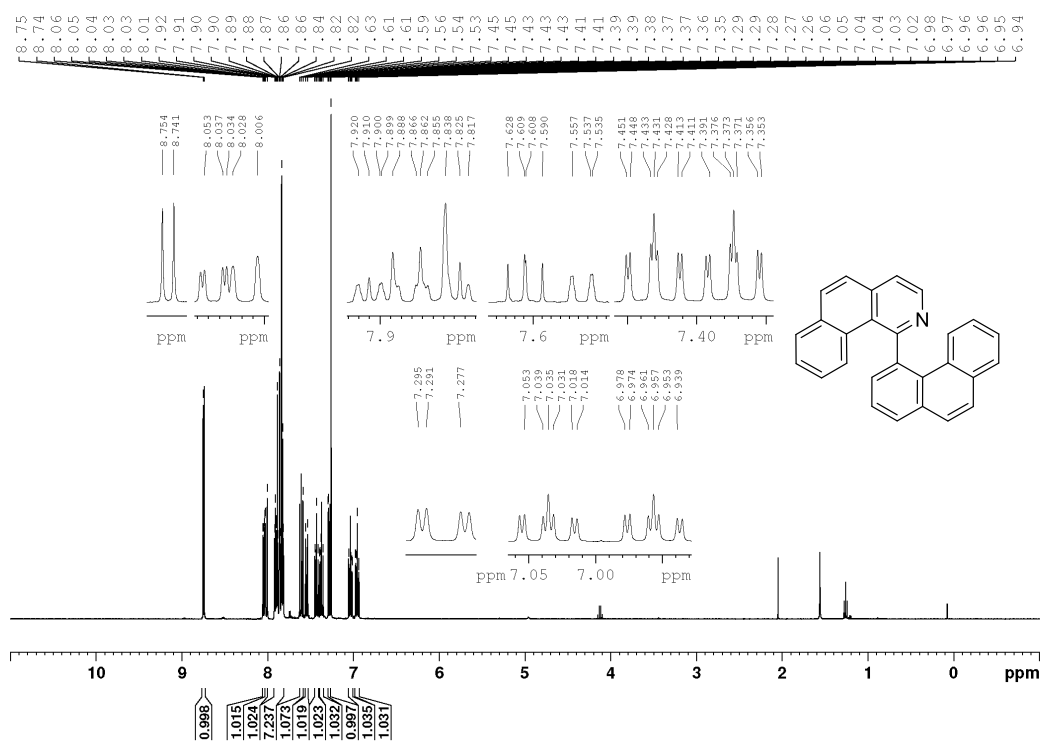Figure S32. <sup>1</sup>H NMR of compound BA (400 MHz, CDCl<sub>3</sub>, 25 °C) (method B).

## SUPPORTING INFORMATION

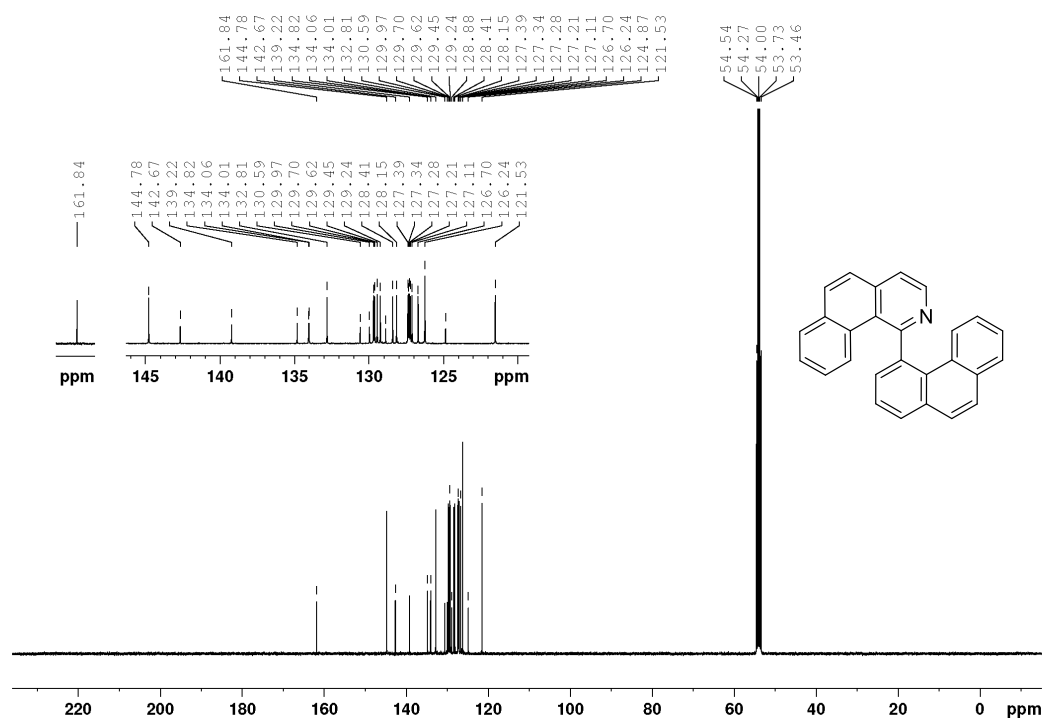Figure S33. <sup>13</sup>C NMR of compound BA (101 MHz, CDCl<sub>3</sub>, 25 °C) (method B).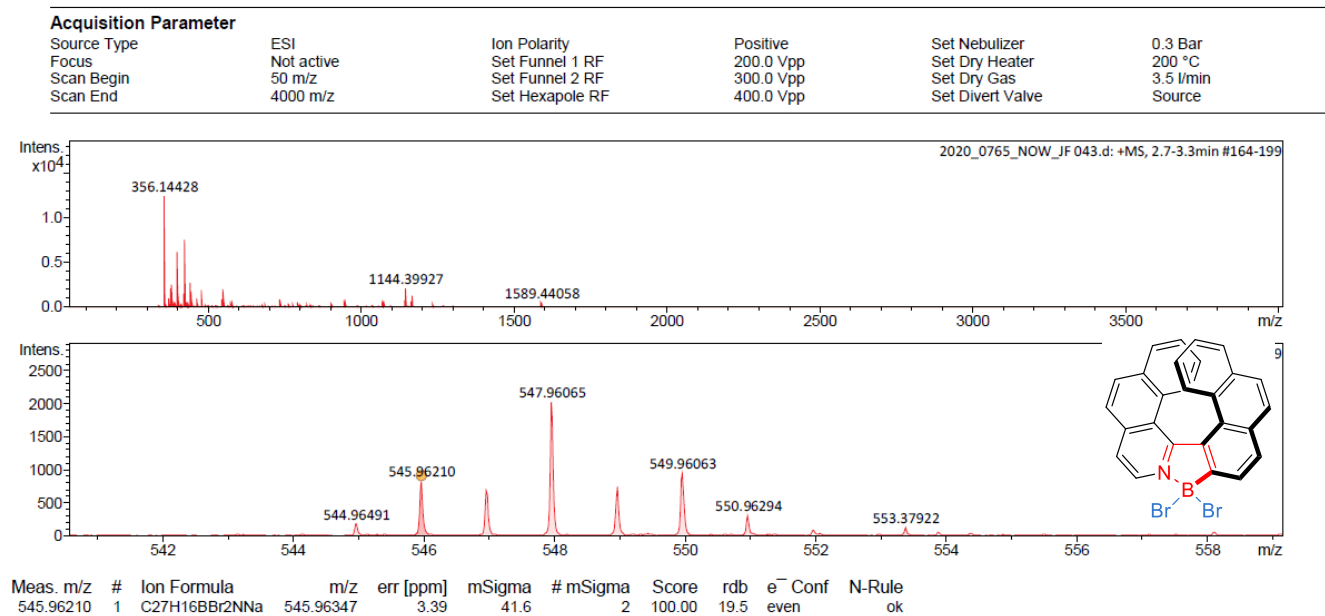Figure S34. HRMS (ESI) spectrum of compound H1-Br<sub>2</sub>.



## SUPPORTING INFORMATION

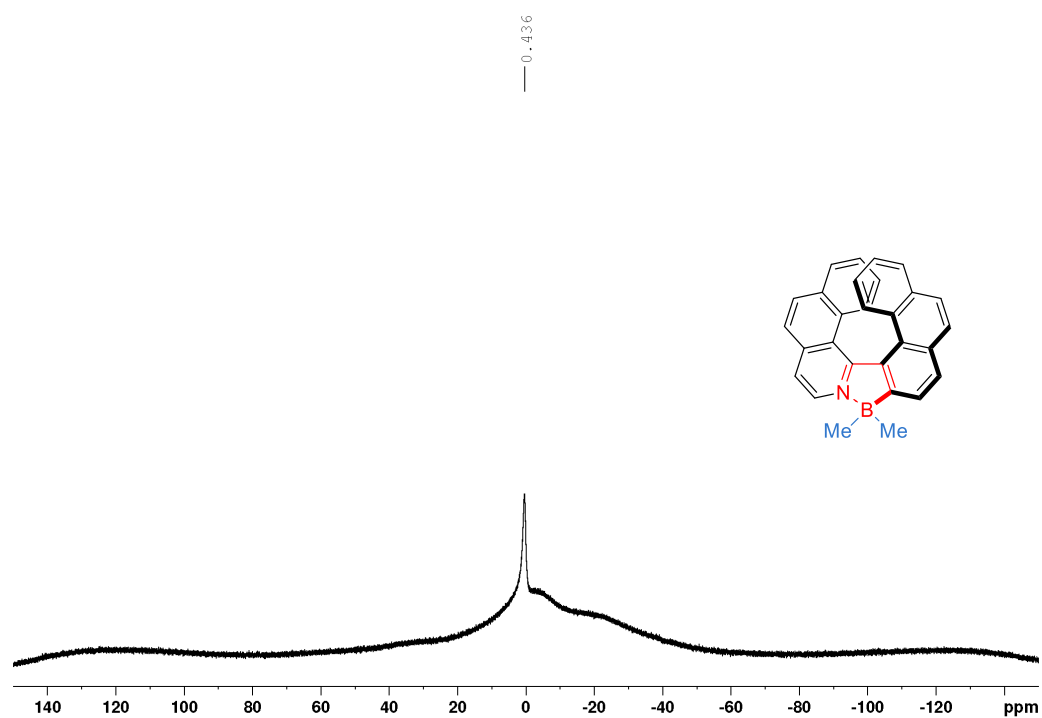

**Figure S37.**  $^{11}\text{B}$  NMR of compound **H1-Me<sub>2</sub>** (128 MHz,  $\text{CD}_2\text{Cl}_2$ , 25 °C).

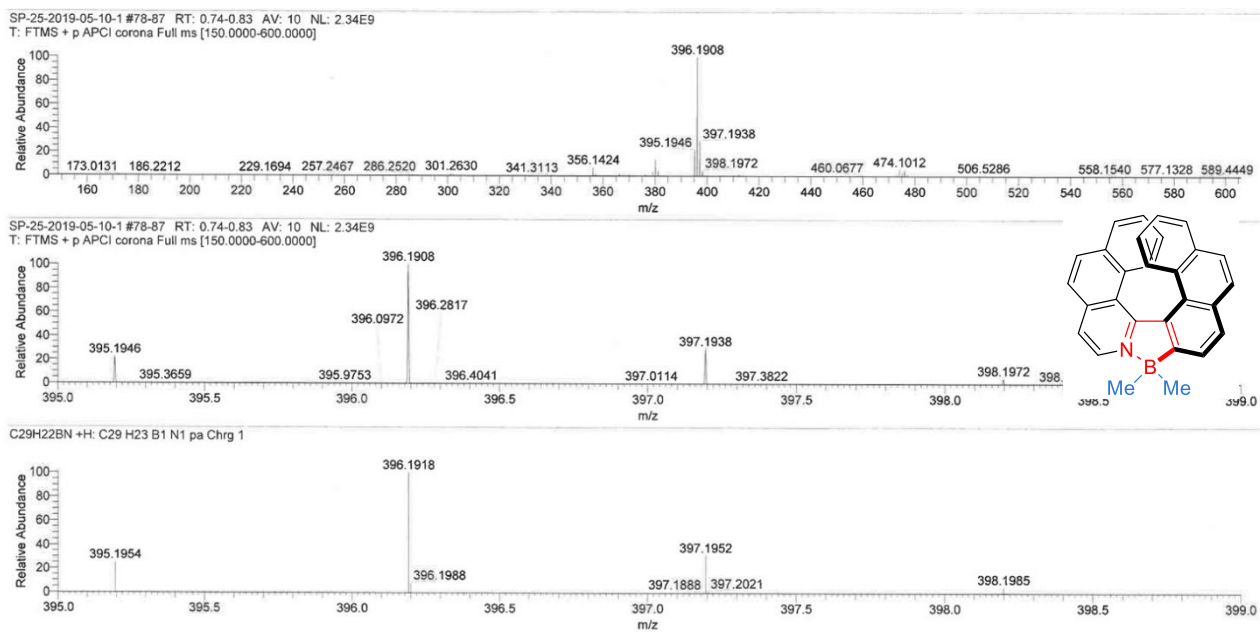

**Figure S38.** HRMS (APCI) spectrum of compound **H1-Me<sub>2</sub>**.

## SUPPORTING INFORMATION

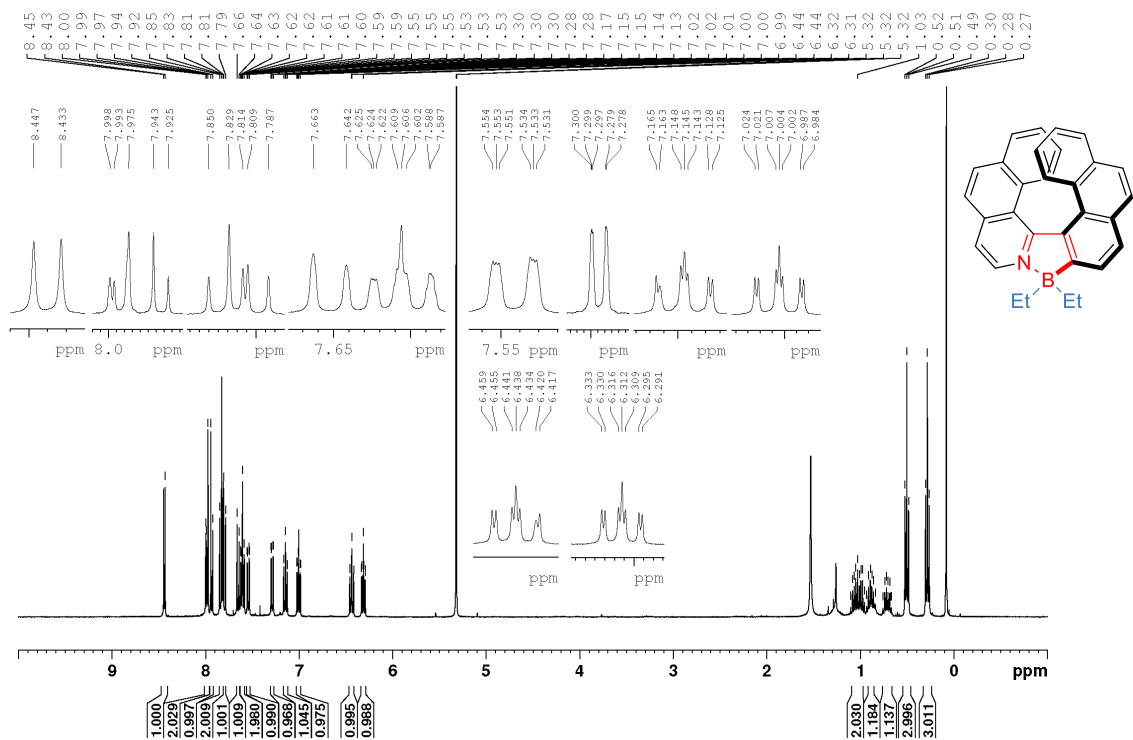

**Figure S39.**  $^1\text{H}$  NMR of compound **H1-Et<sub>2</sub>** (400 MHz,  $\text{CD}_2\text{Cl}_2$ , 25 °C) (method A).

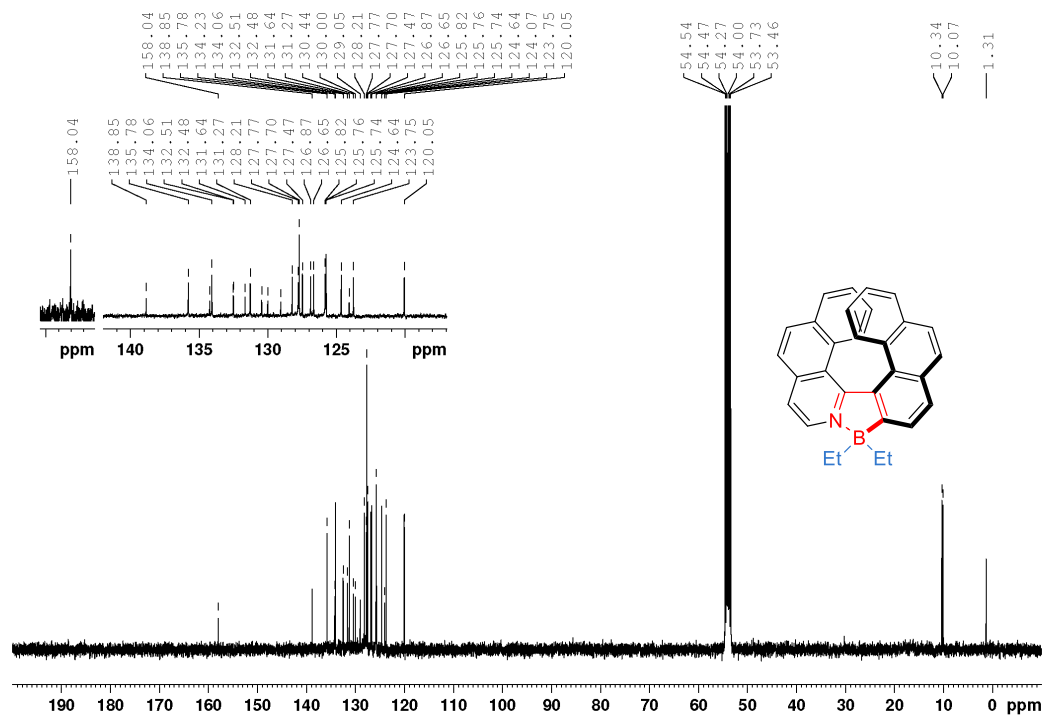

**Figure S40.**  $^{13}\text{C}$  NMR of compound **H1-Et<sub>2</sub>** (101 MHz,  $\text{CD}_2\text{Cl}_2$ , 25 °C) (method A).

## SUPPORTING INFORMATION

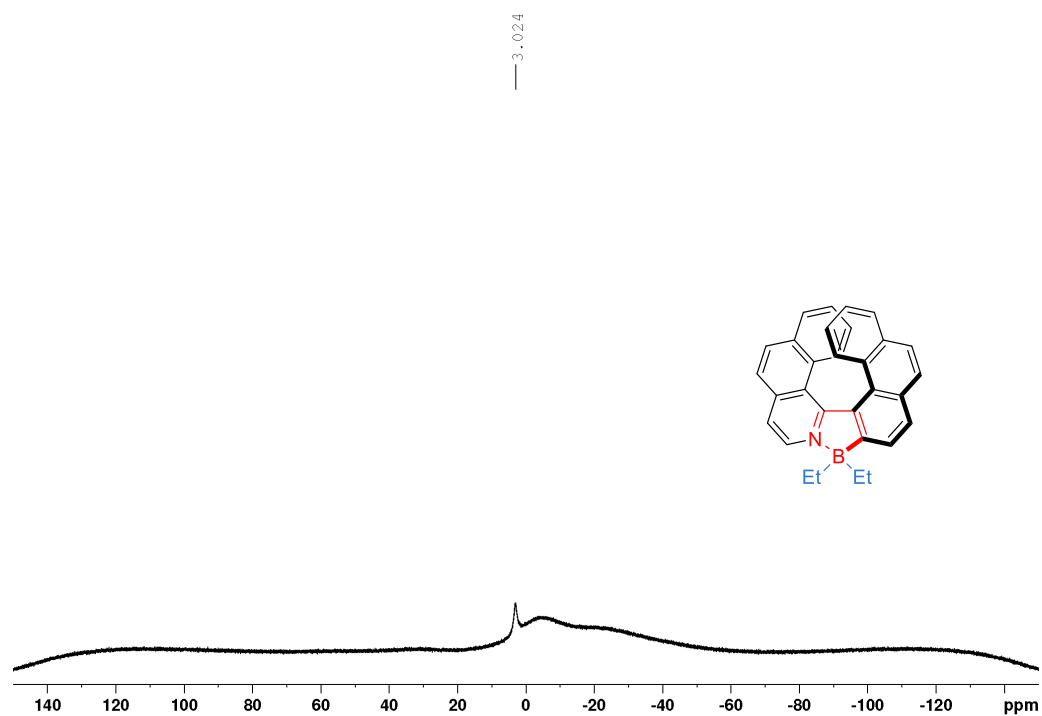

Figure S41.  $^{11}\text{B}$  NMR of compound H1-Et<sub>2</sub> (128 MHz,  $\text{CD}_2\text{Cl}_2$ , 25 °C) (method A).

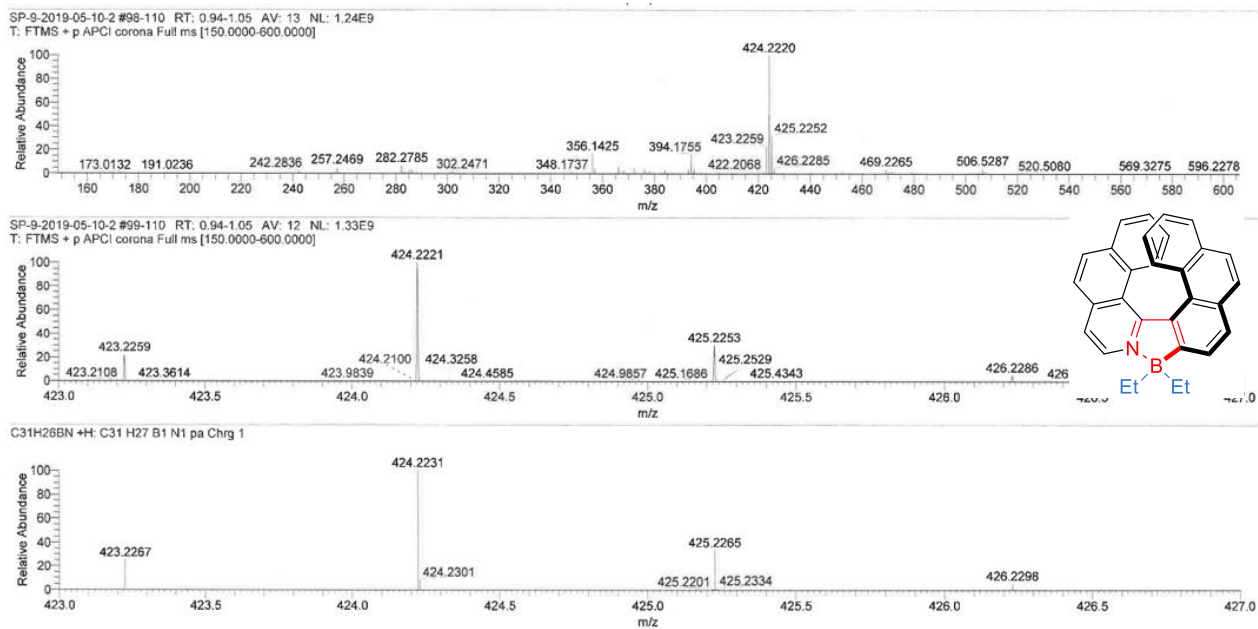

Figure S42. HRMS (APCI) spectrum of compound H1-Et<sub>2</sub> (method A).

## SUPPORTING INFORMATION

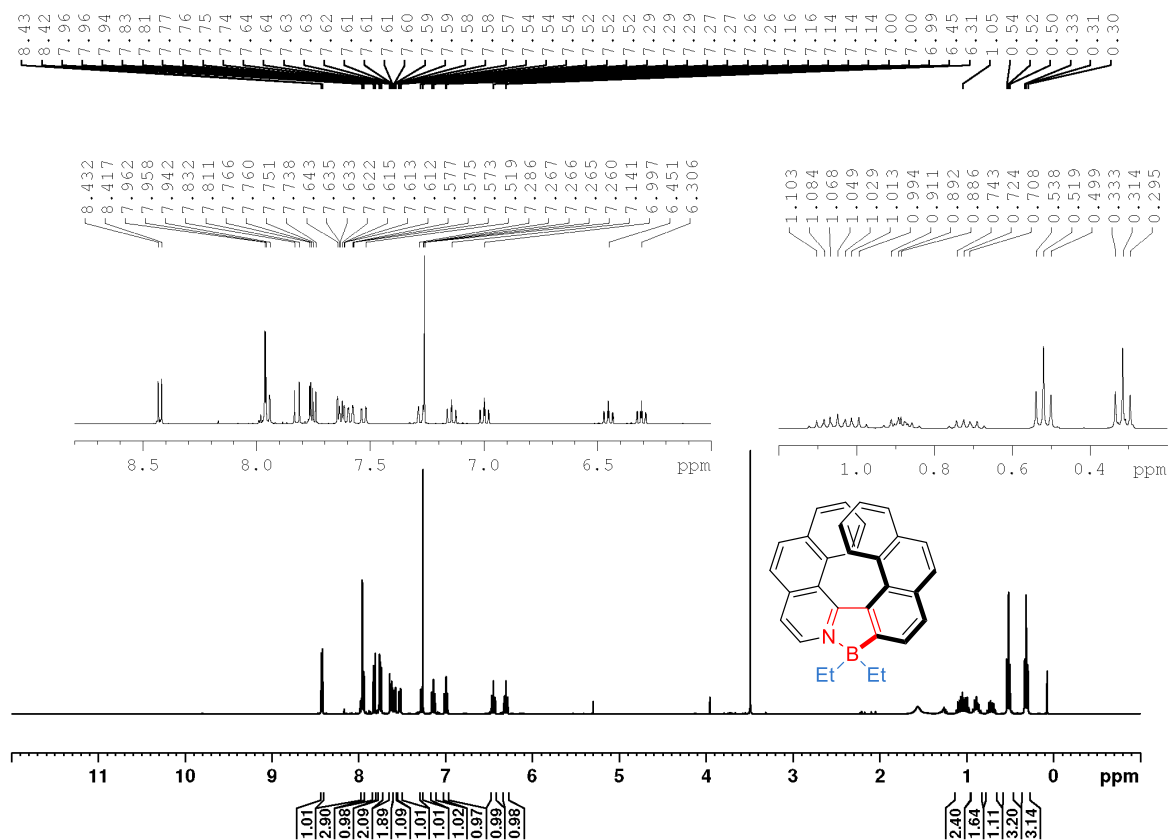

Figure S43. <sup>1</sup>H NMR of compound H1-Et<sub>2</sub> (400 MHz, CDCl<sub>3</sub>, 25 °C) (method B).

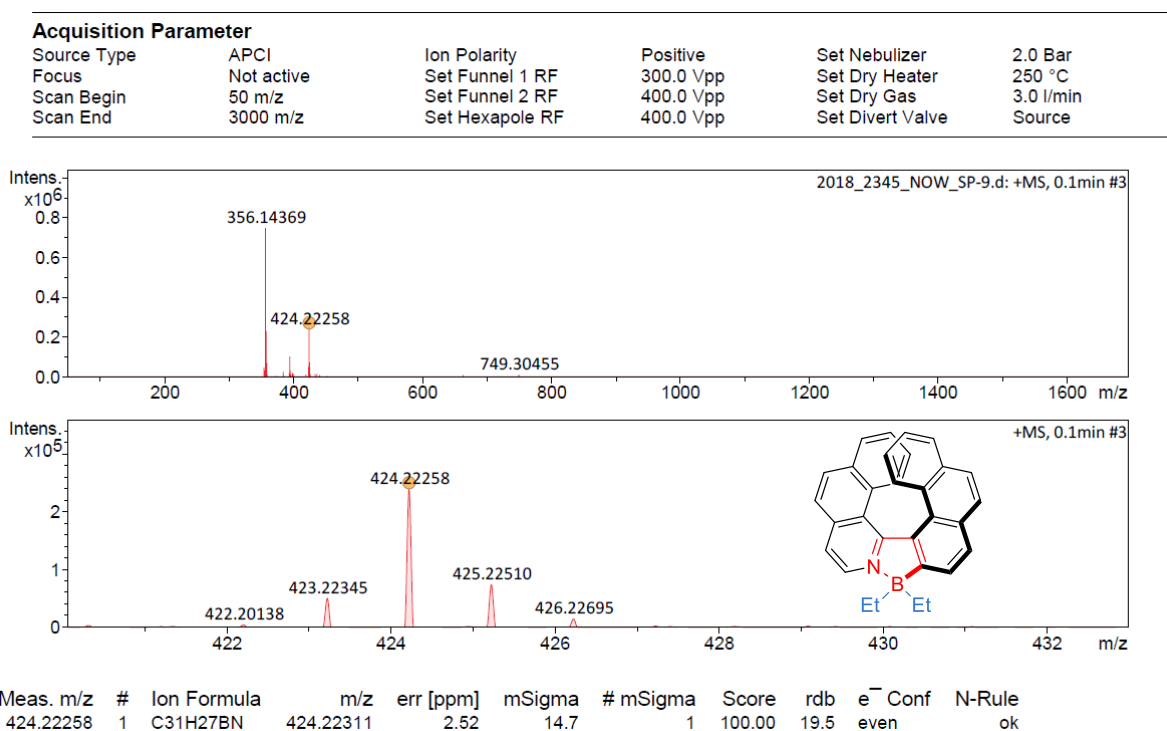

Figure S44. HRMS (APCI) spectrum of compound H1-Et<sub>2</sub> (method B).





## SUPPORTING INFORMATION

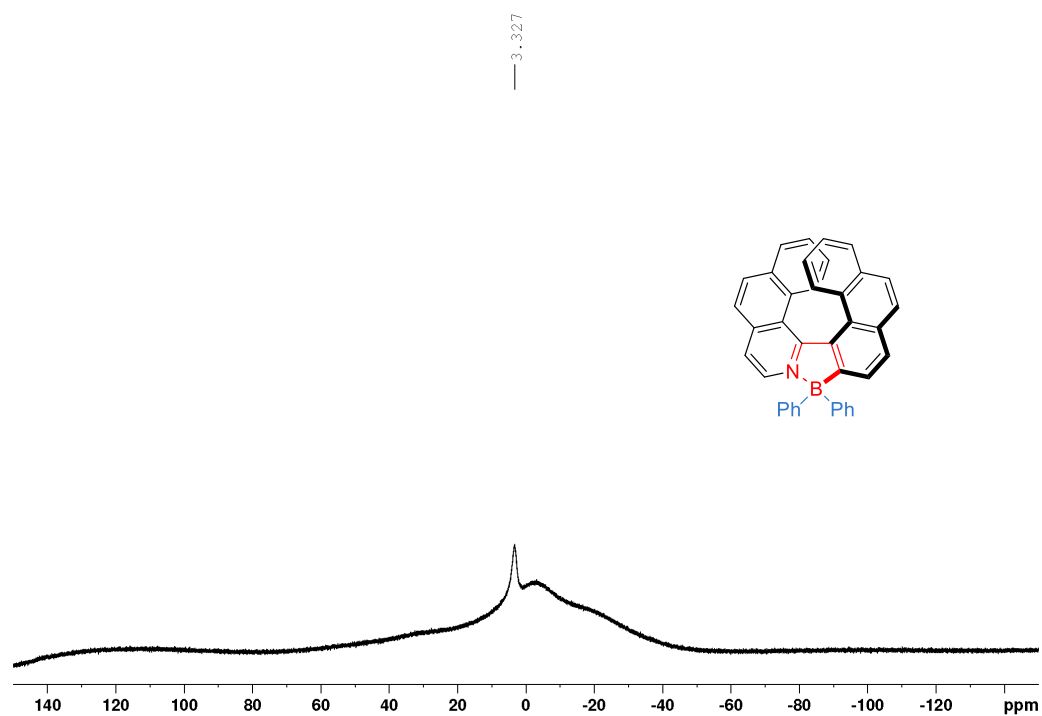

Figure S47.  $^{11}\text{B}$  NMR of compound H1-Ph<sub>2</sub> (128 MHz, CD<sub>2</sub>Cl<sub>2</sub>, 25 °C).

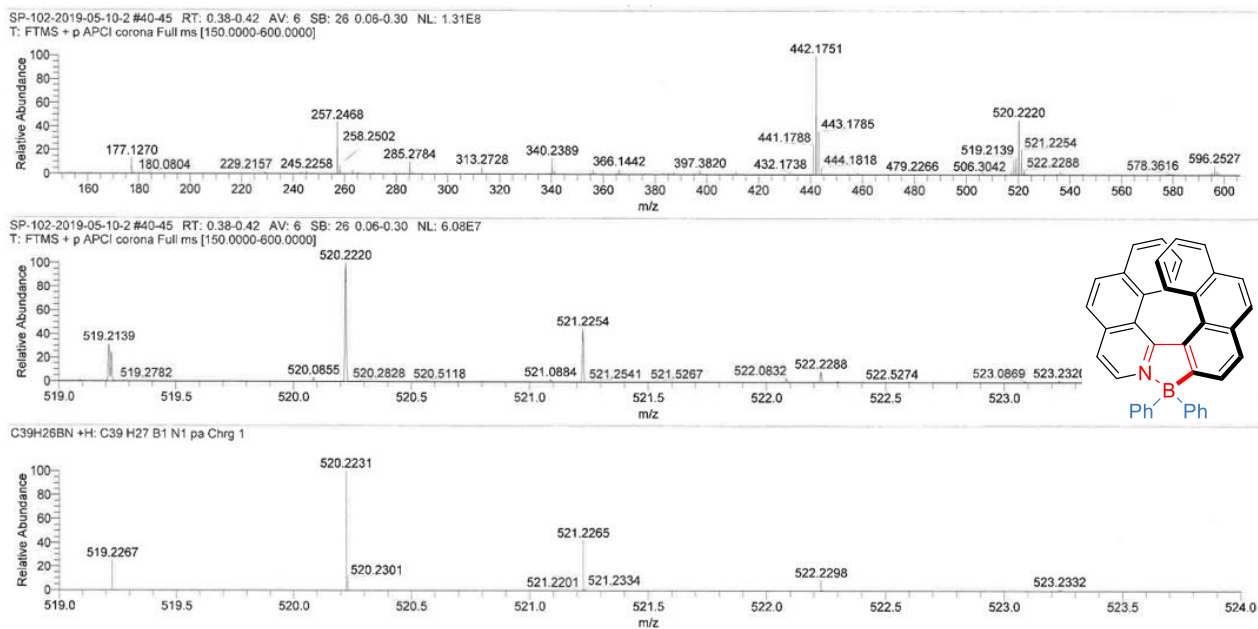

Figure S48. HRMS (APCI) spectrum of compound H1-Ph<sub>2</sub>.

## SUPPORTING INFORMATION

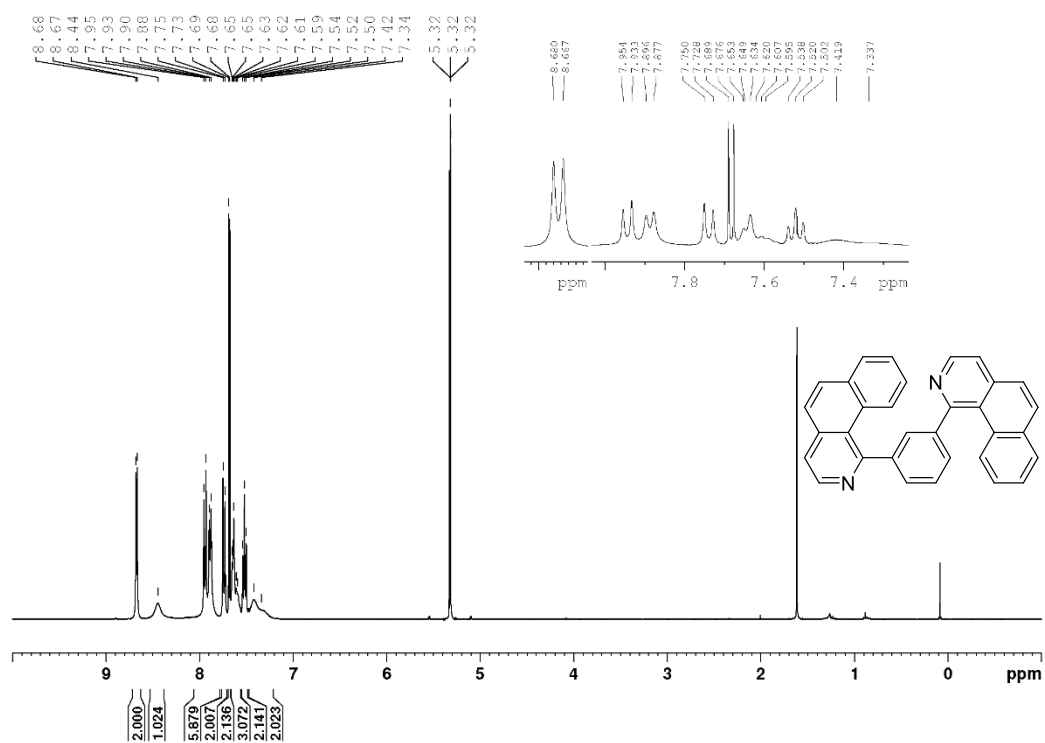

Figure S49. <sup>1</sup>H-NMR of compound TA (400 MHz, CD<sub>2</sub>Cl<sub>2</sub>, 25 °C).

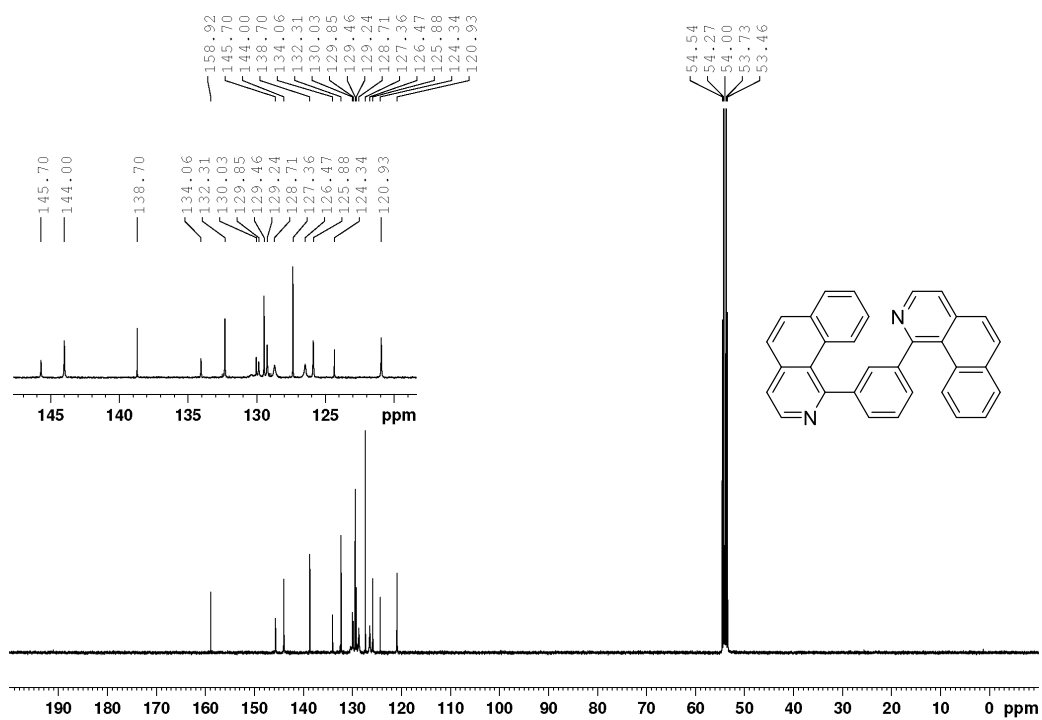

Figure S50. <sup>13</sup>C-NMR of compound TA (101 MHz, CD<sub>2</sub>Cl<sub>2</sub>, 25 °C).

## SUPPORTING INFORMATION

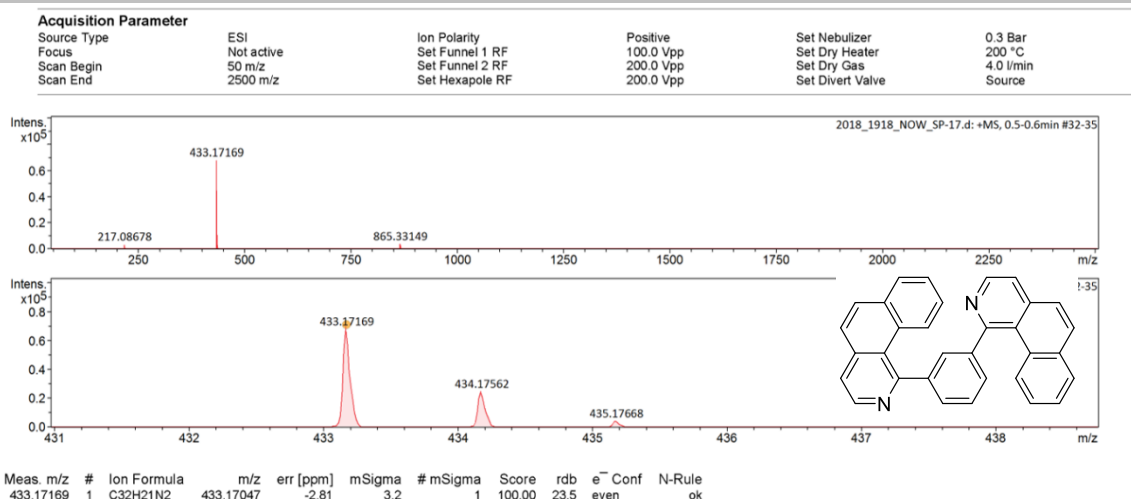

Figure S51. HRMS (ESI) spectrum of compound TA.

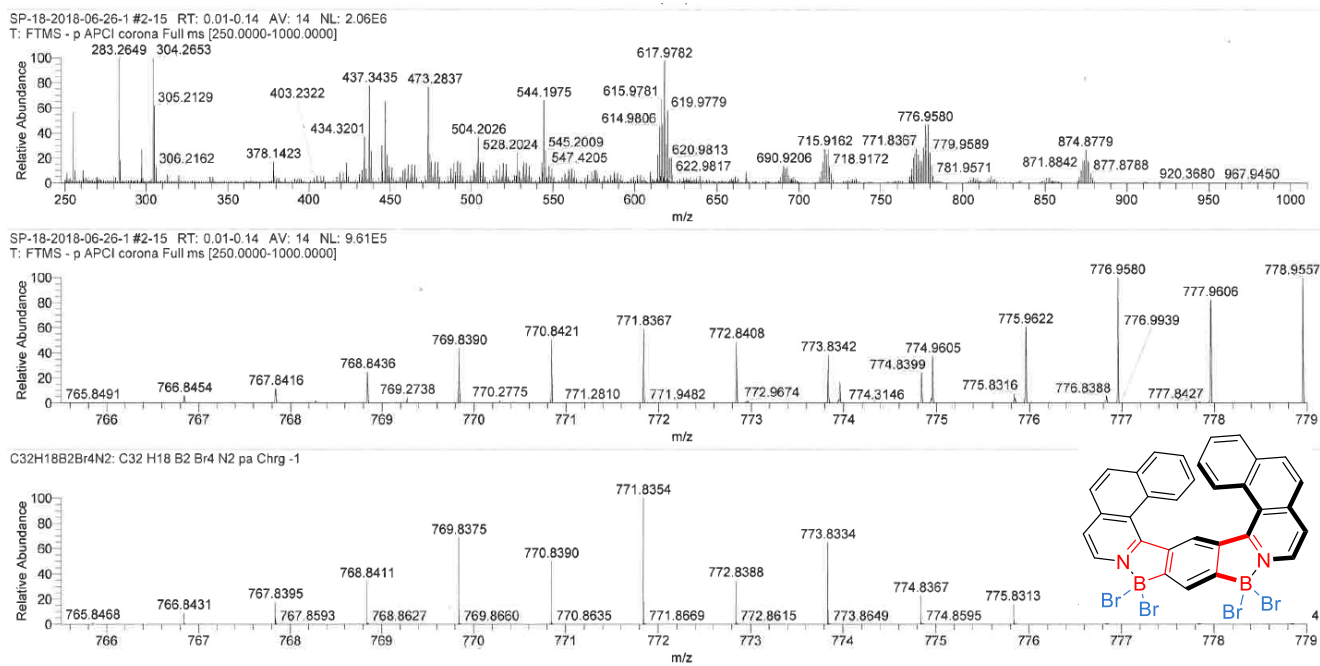Figure S52. HRMS (APCI) spectrum of compound H2-Br<sub>4</sub>.

## SUPPORTING INFORMATION

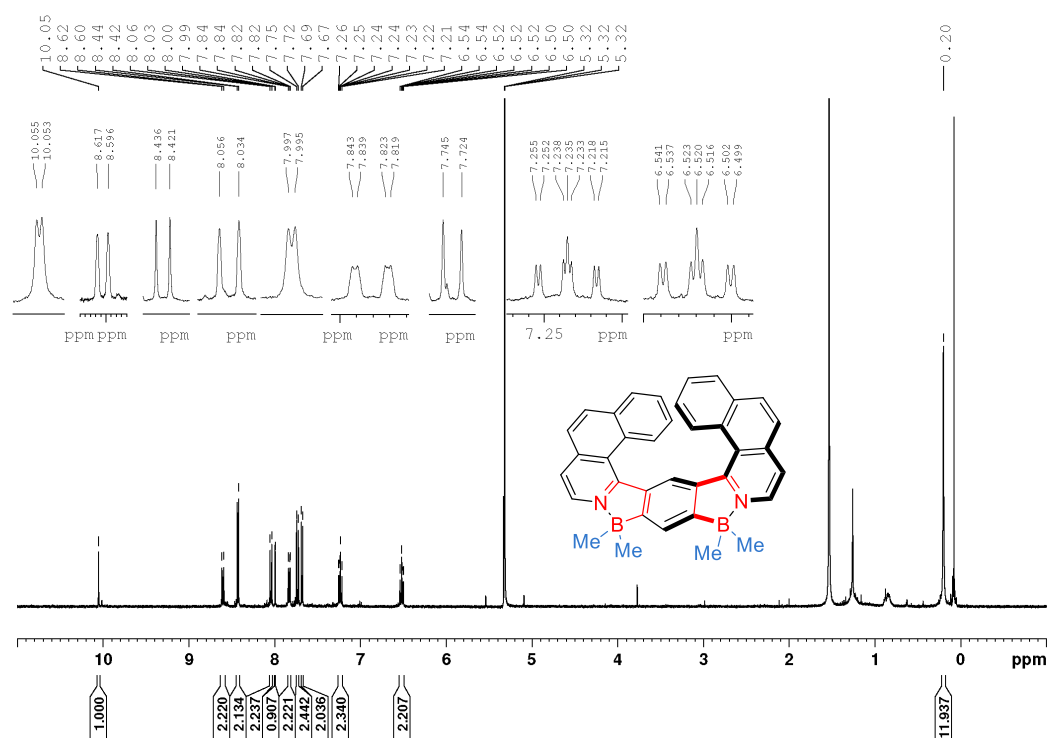

**Figure S53.**  $^1\text{H}$  NMR of compound **H2-Me<sub>4</sub>** (400 MHz,  $\text{CDCl}_3$ , 25 °C).

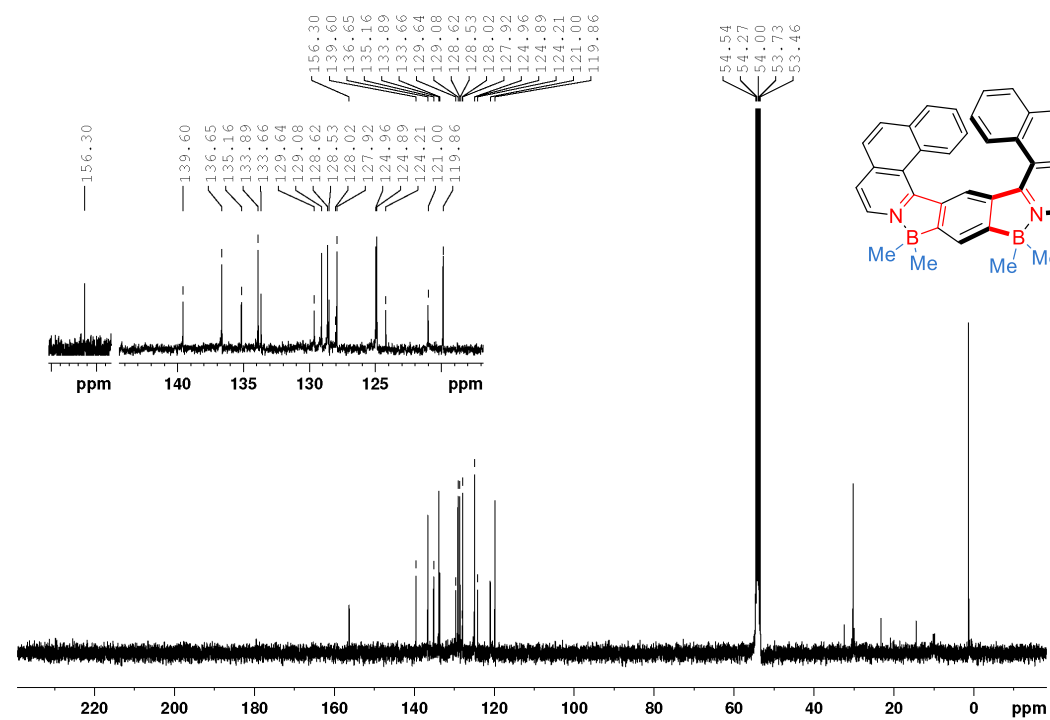

**Figure S54.**  $^{13}\text{C}$  NMR of compound **H2-Me<sub>4</sub>** (101 MHz,  $\text{CD}_2\text{Cl}_2$ , 25 °C).

## SUPPORTING INFORMATION

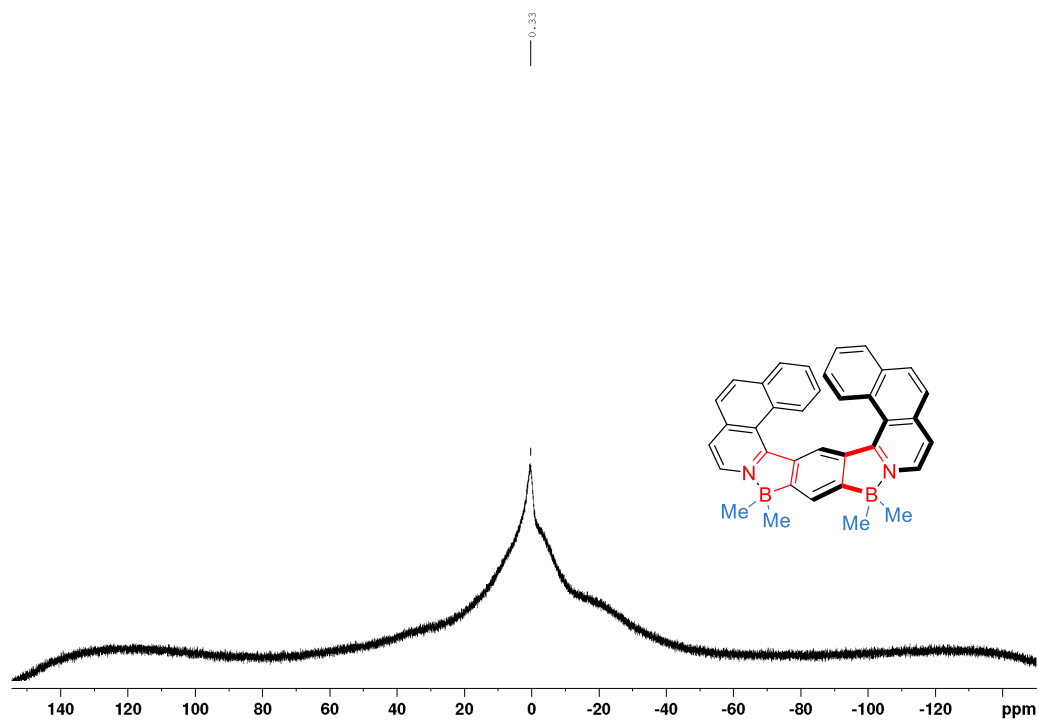

Figure S55.  $^{11}\text{B}$  NMR of compound **H2-Me<sub>4</sub>** (128 MHz,  $\text{CD}_2\text{Cl}_2$ , 25 °C).

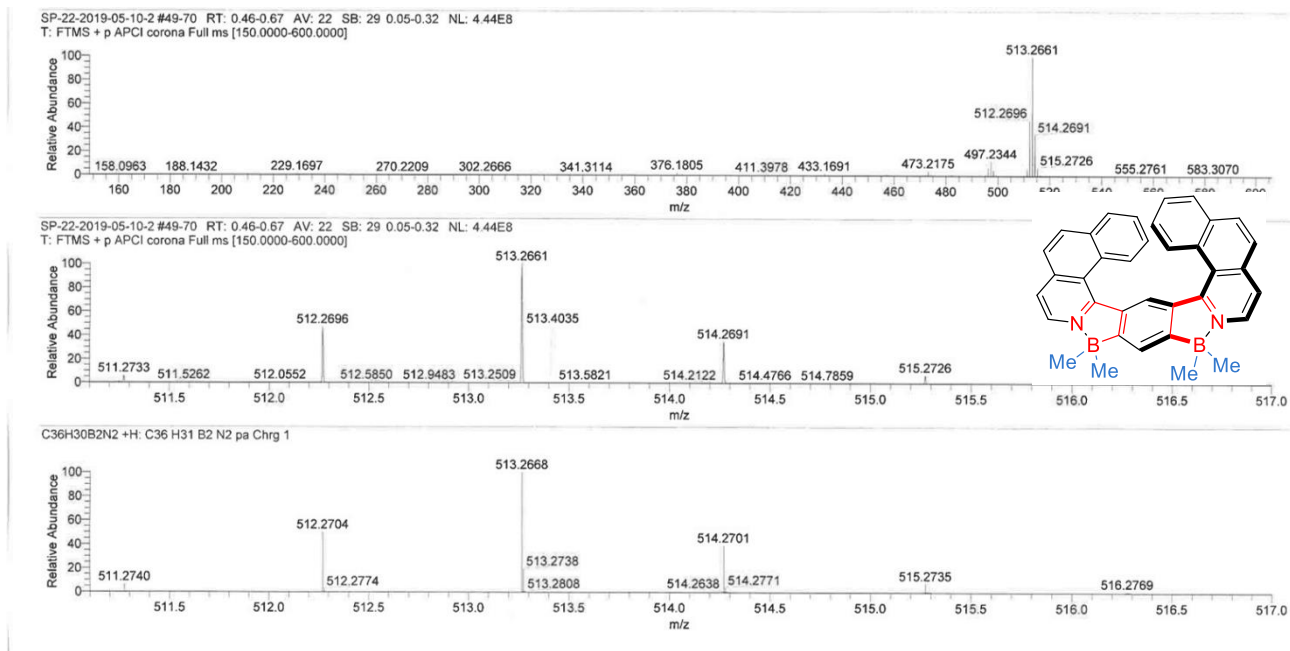

Figure S56. HRMS (APCI) spectrum of compound **H2-Me<sub>4</sub>**.

## SUPPORTING INFORMATION

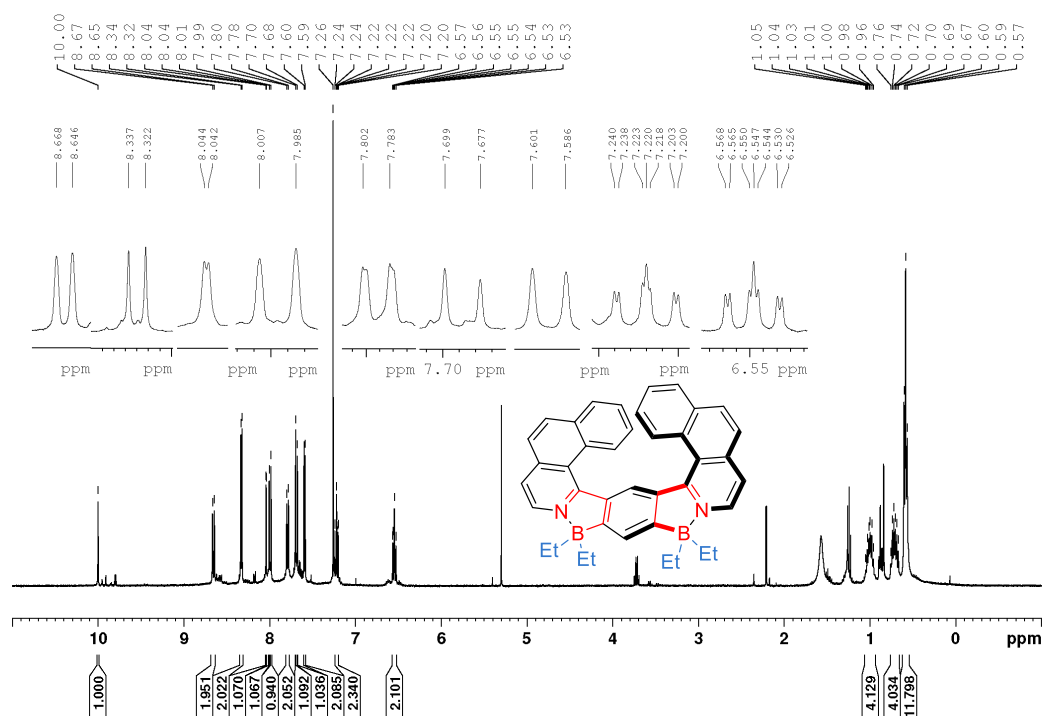

Figure S57.  $^1\text{H}$  NMR of compound H2-Et<sub>4</sub> (400 MHz, CDCl<sub>3</sub>, 25 °C).

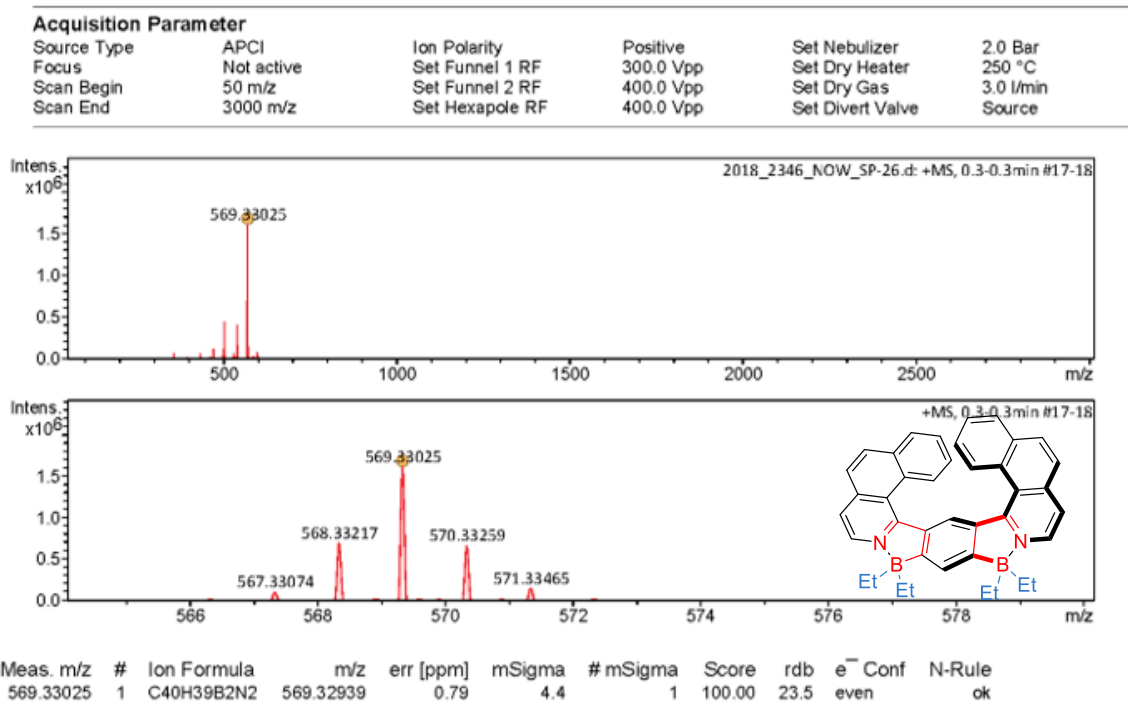

Figure S58. HRMS (ESI) spectrum of compound H2-Et<sub>4</sub>.



## SUPPORTING INFORMATION

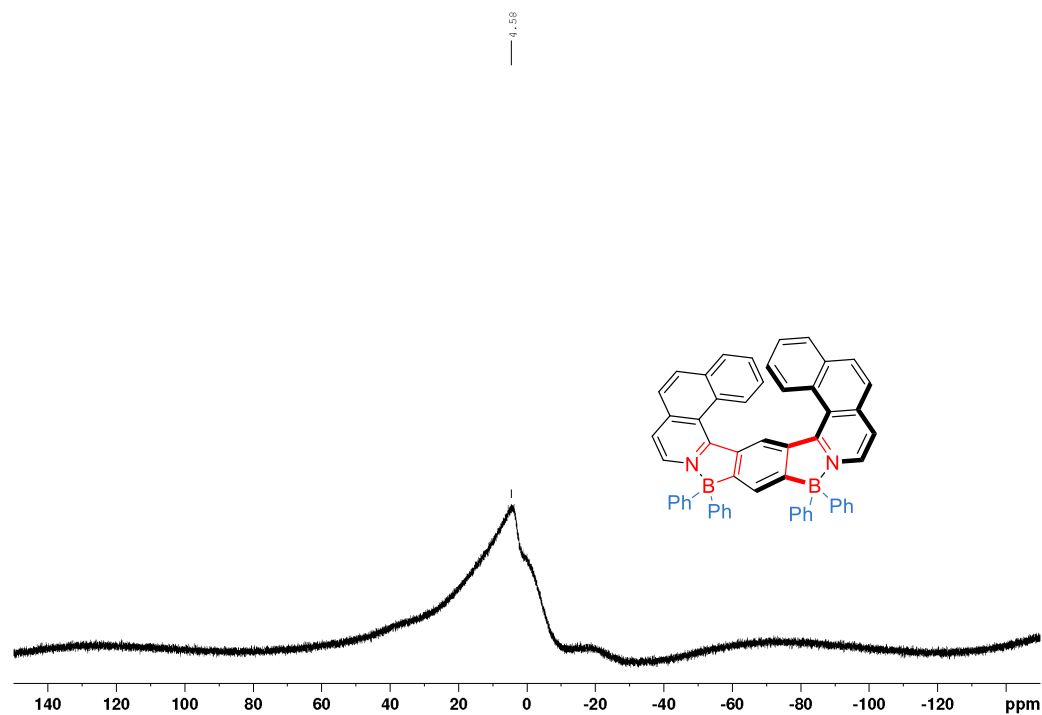

Figure S61. <sup>11</sup>B NMR of compound H2-Ph<sub>4</sub> (128 MHz, CD<sub>2</sub>Cl<sub>2</sub>, 25 °C).

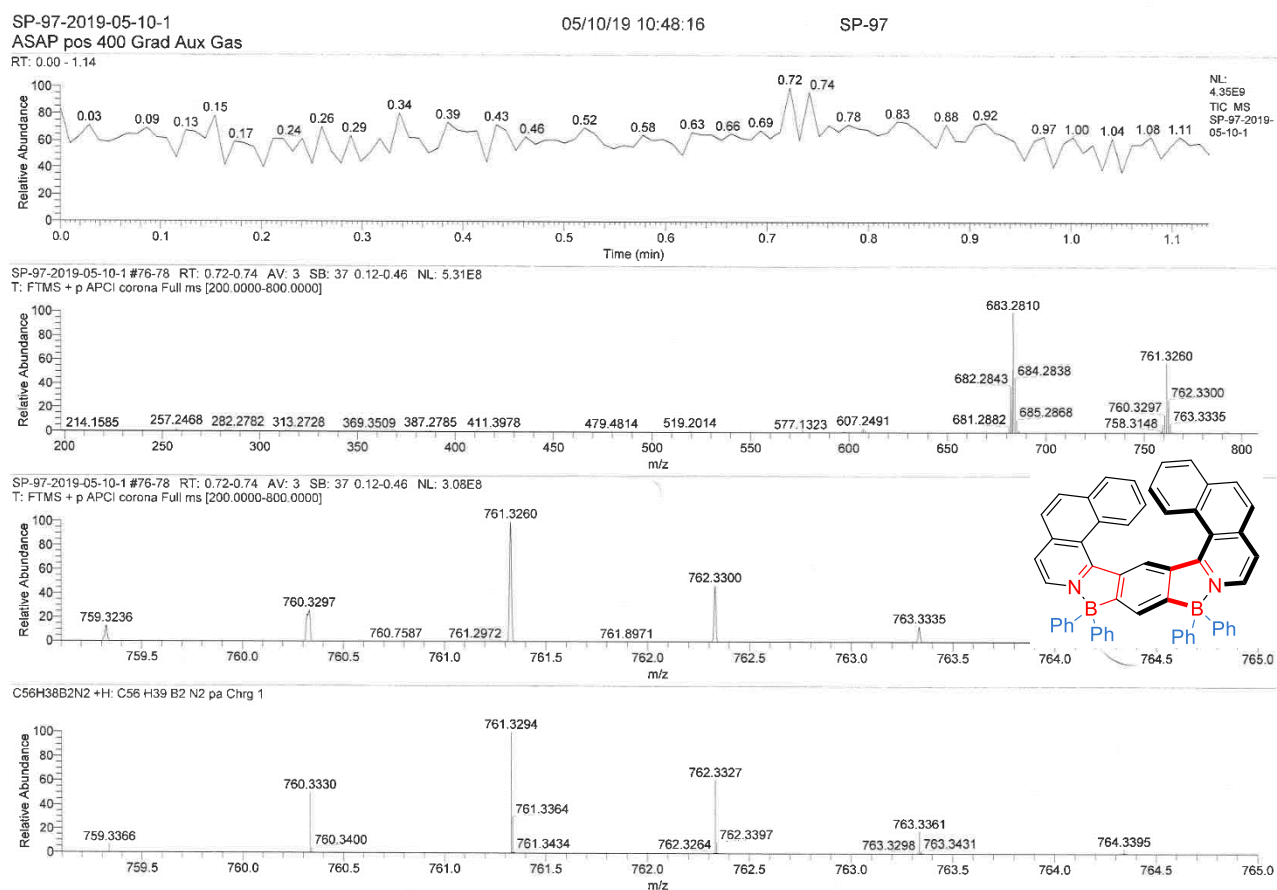

Figure S62. HRMS (ESI) spectrum of compound H2-Ph<sub>4</sub>.



## SUPPORTING INFORMATION

## 4. Single crystal X-ray analysis

Single crystal X-ray diffraction data for compounds **H1-Me<sub>2</sub>**, **H1-Ph<sub>2</sub>**, **H2-Me<sub>4</sub>**, and **H2-Ph<sub>4</sub>** were collected at 100 K on a Bruker D8 Quest Kappa Diffractometer with Photon II CPAD detector and multi-layered mirror monochromated Cu<sub>K</sub>α radiation. The structures were solved using direct methods, expanded with Fourier techniques and refined with the Shelx software package.<sup>[10]</sup> All non-hydrogen atoms were refined anisotropically. Hydrogen atoms were included in the structure factor calculation on geometrically idealized positions.

All the CIF files of crystallographic data have been deposited with the Cambridge Crystallographic Data Centre under the CCDC numbers 1942991, 1942993, 1942995 and 1942994, respectively. These data can be obtained free of charge from The Cambridge Crystallographic Data Centre via [www.ccdc.ac.uk/data/request/cif](http://www.ccdc.ac.uk/data/request/cif).

**Crystal data for H1-Me<sub>2</sub>:** C<sub>29</sub>H<sub>22</sub>BN, *M<sub>r</sub>* = 395.28, yellow block, 0.347×0.272×0.051 mm<sup>3</sup>, monoclinic space group P2<sub>1</sub>/*n*, *a* = 12.3755(6) Å, *b* = 11.0420(5) Å, *c* = 15.4876(8) Å, α = 90°, β = 99.498(2)°, γ = 90°, *V* = 2087.37(18) Å<sup>3</sup>, *Z* = 4, ρ<sub>calcd</sub> = 1.258 g·cm<sup>-3</sup>, μ = 0.543 mm<sup>-1</sup>, *F*<sub>(000)</sub> = 832, *T* = 100(2) K, *Goof*(*F*<sup>2</sup>) = 1.031, *R*<sub>1</sub> = 0.0393, *wR*<sup>2</sup> = 0.1007 for *I* > 2σ(*I*), *R*<sub>1</sub> = 0.0428, *wR*<sup>2</sup> = 0.1037 for all data, 4123 unique reflections [*θ* ≤ 72.294°] with a completeness of 99.7% and 282 parameters, 0 restraints. CCDC 1942991.

**Crystal data for H1-Ph<sub>2</sub>:** C<sub>39</sub>H<sub>26</sub>BN, *M<sub>r</sub>* = 519.42, yellow block, 0.121×0.095×0.043 mm<sup>3</sup>, triclinic space group P $\bar{1}$ , *a* = 10.1360(3) Å, *b* = 11.2403(4) Å, *c* = 12.8449(4) Å, α = 69.302(2)°, β = 82.133(2)°, γ = 86.657(2)°, *V* = 1356.02(8) Å<sup>3</sup>, *Z* = 2, ρ<sub>calcd</sub> = 1.272 g·cm<sup>-3</sup>, μ = 0.551 mm<sup>-1</sup>, *F*<sub>(000)</sub> = 544, *T* = 100(2) K, *Goof*(*F*<sup>2</sup>) = 1.054, *R*<sub>1</sub> = 0.0488, *wR*<sup>2</sup> = 0.1055 for *I* > 2σ(*I*), *R*<sub>1</sub> = 0.0671, *wR*<sup>2</sup> = 0.1174 for all data, 5331 independent reflections [*θ* ≤ 72.221°] with a completeness of 99.6% and 371 parameters, 0 restraints. CCDC 1942993.

**Crystal data for H2-Me<sub>4</sub>:** C<sub>36</sub>H<sub>30</sub>B<sub>2</sub>N<sub>2</sub>, *M<sub>r</sub>* = 512.24, colorless plate, 0.172×0.050×0.014 mm<sup>3</sup>, monoclinic space group P2<sub>1</sub>/*n*, *a* = 13.8040(8) Å, *b* = 11.9514(7) Å, *c* = 16.7181(10) Å, α = 90°, β = 91.729(4)°, γ = 90°, *V* = 2756.8(3) Å<sup>3</sup>, *Z* = 4, ρ<sub>calcd</sub> = 1.234 g·cm<sup>-3</sup>, μ = 0.535 mm<sup>-1</sup>, *F*<sub>(000)</sub> = 1080, *T* = 100(2) K, *Goof*(*F*<sup>2</sup>) = 1.027, *R*<sub>1</sub> = 0.0684, *wR*<sup>2</sup> = 0.1742 for *I* > 2σ(*I*), *R*<sub>1</sub> = 0.1040, *wR*<sup>2</sup> = 0.2049 for all data, 5470 independent reflections [*θ* ≤ 73.051°] with a completeness of 99.0% and 365 parameters, 0 restraints. CCDC 1942995.

**Crystal data for H2-Ph<sub>4</sub>:** C<sub>56</sub>H<sub>38</sub>B<sub>2</sub>N<sub>2</sub>·CH<sub>2</sub>Cl<sub>2</sub>, *M<sub>r</sub>* = 845.43, colorless block, 0.257×0.101×0.040 mm<sup>3</sup>, triclinic space group P $\bar{1}$ , *a* = 12.3206(11) Å, *b* = 13.3049(11) Å, *c* = 14.8111(13) Å, α = 102.329(4)°, β = 113.494(4)°, γ = 90.296(4)°, *V* = 2164.2(3) Å<sup>3</sup>, *Z* = 2, ρ<sub>calcd</sub> = 1.297 g·cm<sup>-3</sup>, μ = 1.669 mm<sup>-1</sup>, *F*<sub>(000)</sub> = 880, *T* = 100(2) K, *Goof*(*F*<sup>2</sup>) = 1.019, *R*<sub>1</sub> = 0.0709, *wR*<sub>2</sub> = 0.1652 for *I* > 2σ(*I*), *R*<sub>1</sub> = 0.0996, *wR*<sup>2</sup> = 0.1908 for all data, 8445 independent reflections [*θ* ≤ 72.342°] with a completeness of 98.6% and 590 parameters, 11 restraints. CCDC 1942994.

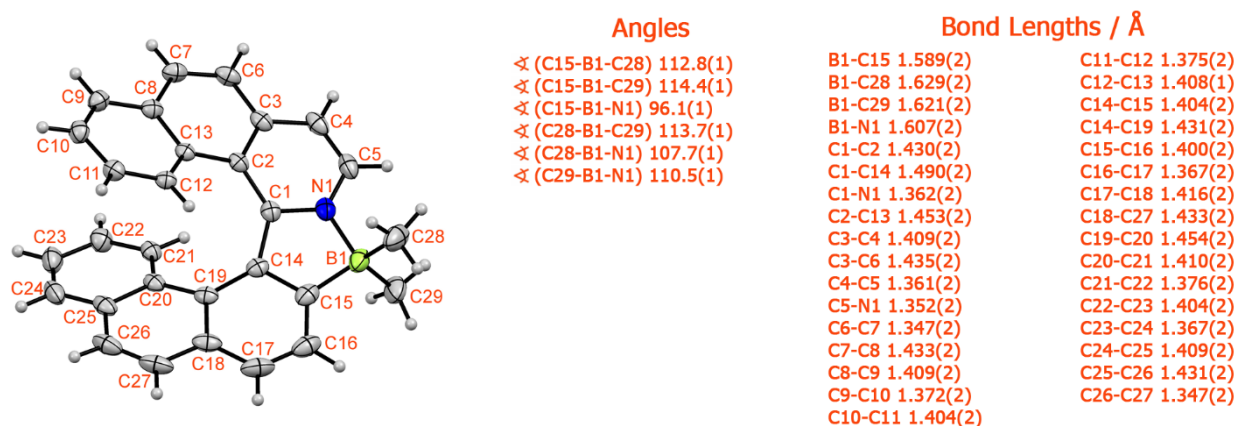

**Figure S63.** Molecular structure of **H1-Me<sub>2</sub>** in the solid state with the selected bond lengths and angles. Thermal displacement parameters are displayed at the 50% probability.

## SUPPORTING INFORMATION

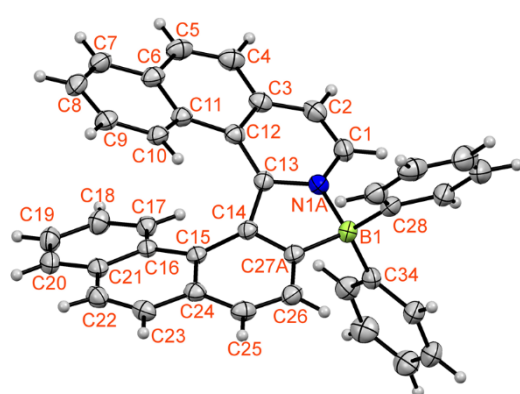

## Angles

- ∠ (C28-B1-C34) 115.8(2)°
- ∠ (C28-B1-N1A) 110.5(2)°
- ∠ (C28-B1-C27A) 113.2(2)°
- ∠ (C34-B1-N1A) 111.1(2)°
- ∠ (C34-B1-C27A) 108.6(2)°
- ∠ (N1A-B1-C27A) 95.9(1)°

## Bond Lengths / Å

|                  |                   |
|------------------|-------------------|
| B1-C28 1.618(3)  | C13-C14 1.488(2)  |
| B1-C34 1.629(2)  | C13-N1A 1.381(2)  |
| B1-N1A 1.597(3)  | C14-C15 1.433(3)  |
| B1-C27A 1.595(3) | C14-C27A 1.383(3) |
| C1-C2 1.356(3)   | C15-C16 1.454(3)  |
| C1-N1A 1.377(2)  | C16-C17 1.406(3)  |
| C2-C3 1.403(3)   | C17-C18 1.382(3)  |
| C3-C4 1.429(3)   | C18-C19 1.403(3)  |
| C4-C5 1.346(3)   | C19-C20 1.367(3)  |
| C5-C6 1.425(3)   | C20-C21 1.409(3)  |
| C6-C7 1.407(3)   | C21-C22 1.430(3)  |
| C7-C8 1.360(3)   | C22-C23 1.349(3)  |
| C8-C9 1.409(3)   | C23-C24 1.433(3)  |
| C9-C10 1.376(3)  | C24-C25 1.406(3)  |
| C10-C11 1.407(2) | C25-C26 1.361(3)  |
| C11-C12 1.456(2) | C26-C27A 1.375(2) |
| C12-C13 1.439(2) |                   |

**Figure S64.** Molecular structure of H1-Ph<sub>2</sub> in the solid state with the selected bond lengths and angles. Thermal displacement parameters are displayed at the 50% probability.

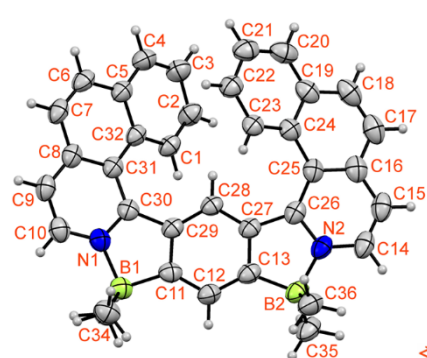

## Angles

- ∠ (C11-B1-C33) 112.4(2)°
- ∠ (C11-B1-C34) 115.6(2)°
- ∠ (C11-B1-N1) 95.8(2)°
- ∠ (C33-B1-C34) 114.6(2)°
- ∠ (C33-B1-N1) 106.5(2)°
- ∠ (C34-B1-N1) 109.8(2)°
- ∠ (C13-B2-C35) 113.1(3)°
- ∠ (C13-B2-C36) 113.4(3)°
- ∠ (C13-B2-N2) 96.4(2)°
- ∠ (C35-B2-C36) 114.4(3)°
- ∠ (C35-B2-N2) 109.8(3)°
- ∠ (C36-B2-N2) 108.0(3)°

## Bond Lengths / Å

|                  |                  |
|------------------|------------------|
| B1-C11 1.594(4)  | C13-C27 1.418(4) |
| B1-C33 1.626(4)  | C14-C15 1.352(4) |
| B1-C34 1.618(4)  | C14-N2 1.350(4)  |
| B1-N1 1.626(4)   | C15-C16 1.412(4) |
| B2-C13 1.598(5)  | C16-C17 1.426(4) |
| B2-C35 1.628(4)  | C17-C18 1.357(5) |
| B2-C36 1.621(5)  | C18-C19 1.430(4) |
| B2-N2 1.616(5)   | C19-C20 1.411(4) |
| C1-C2 1.365(4)   | C20-C21 1.370(4) |
| C1-C32 1.414(4)  | C21-C22 1.398(4) |
| C2-C3 1.402(4)   | C22-C23 1.377(4) |
| C3-C4 1.370(4)   | C23-C24 1.415(4) |
| C4-C5 1.405(4)   | C24-C25 1.461(4) |
| C5-C6 1.428(4)   | C25-C26 1.428(4) |
| C6-C7 1.345(4)   | C26-C27 1.481(4) |
| C7-C8 1.435(4)   | C26-N2 1.352(3)  |
| C8-C9 1.407(4)   | C27-C28 1.395(4) |
| C9-C10 1.359(4)  | C28-C29 1.393(4) |
| C10-N1 1.348(3)  | C29-C30 1.479(4) |
| C11-C12 1.390(4) | C30-C31 1.427(4) |
| C11-C29 1.415(4) | C30-N1 1.349(3)  |
| C12-C13 1.389(4) | C31-C32 1.444(4) |

**Figure S65.** Molecular structure of H2-Me<sub>4</sub> in the solid state with the selected bond lengths and angles. Thermal displacement parameters are displayed at the 50% probability.

## SUPPORTING INFORMATION

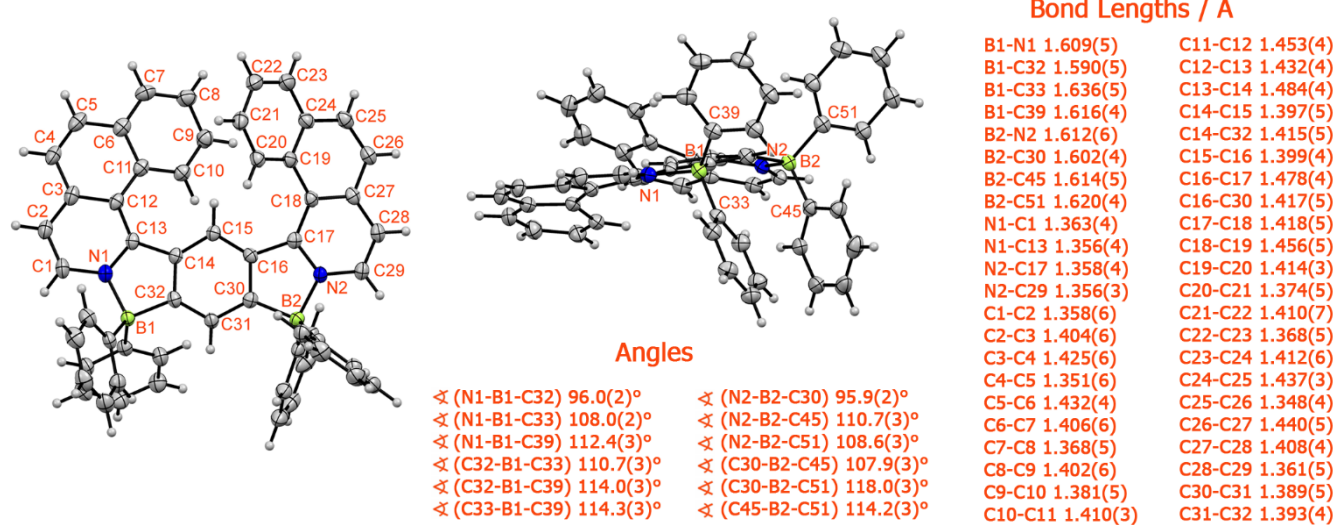

**Figure S66.** Molecular structure of **H2-Ph<sub>4</sub>** in the solid state with the selected bond lengths and angles. Thermal displacement parameters are displayed at the 50% probability.

## SUPPORTING INFORMATION

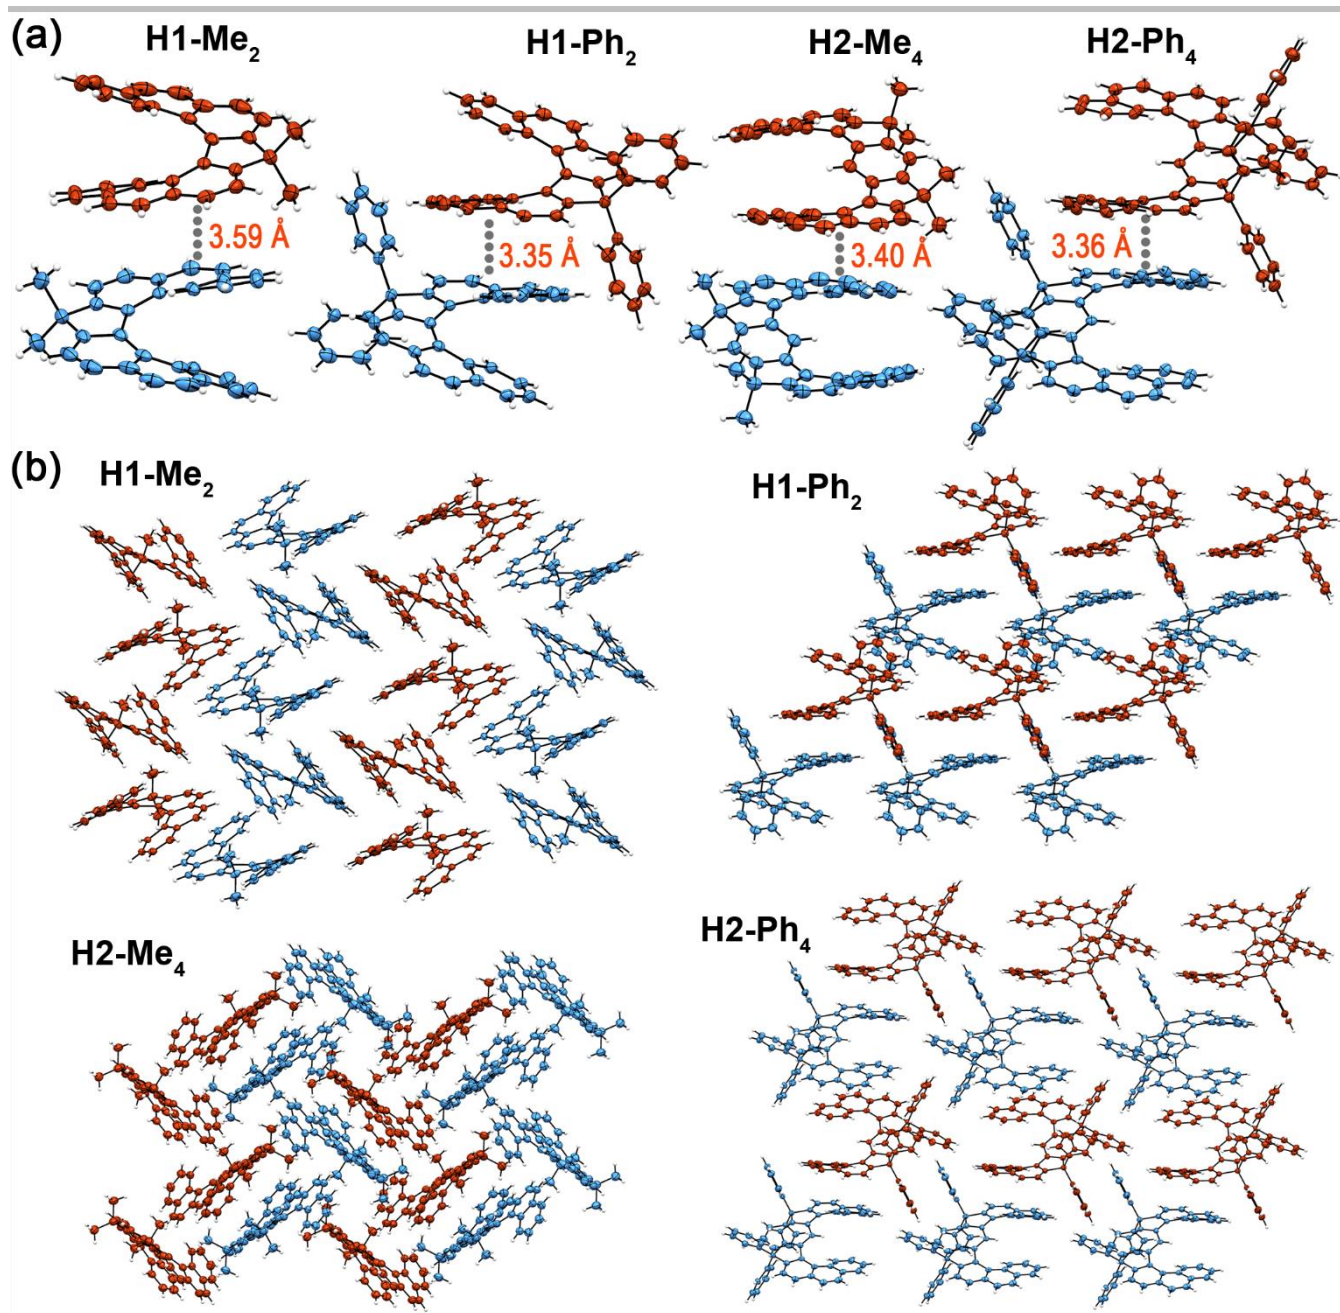

**Figure S67.** a) Dimers and b) packing arrangements of **H1-Me<sub>2</sub>**, **H1-Ph<sub>2</sub>**, **H2-Me<sub>4</sub>**, and **H2-Ph<sub>4</sub>**. Enantiomers with *P*- and *M*-helicity are colored in maroon and blue, respectively. The ORTEP drawings are shown with 50% probability. Co-crystallized solvent molecules, i.e. CH<sub>2</sub>Cl<sub>2</sub>, in the crystal structure of **H2-Ph<sub>4</sub>** are omitted for clarity.

## SUPPORTING INFORMATION

## 5. Optical and Electrochemical Properties

Table S1. Optical and electrochemical properties of helical compounds.

| Cpd                      | $\lambda_{\text{abs}}^{[a]}$<br>/ nm | $\epsilon_{\text{max}}^{[b]}$ /<br>$10^3 \text{ M}^{-1} \text{ cm}^{-1}$ | $\lambda_{\text{em}}^{[c]}$<br>/ nm | Stokes<br>shift /<br>$\text{cm}^{-1}$ | $\Phi_{\text{fl}}^{[d]}$ | $\lambda_{\text{abs}}^{[e]}$<br>/ nm | $\lambda_{\text{em}}^{[f]}$<br>/ nm | $\Phi_{\text{fl}}^{[g]}$ | $E_{1/2}(\text{red1})^{[h]}$<br>/ V | $E_{1/2}(\text{red2})^{[h]}$<br>/ V | $E_{1/2}(\text{ox1})^{[h]}$ /<br>V | $E_{1/2}(\text{ox1})^{[h]}$ / V |
|--------------------------|--------------------------------------|--------------------------------------------------------------------------|-------------------------------------|---------------------------------------|--------------------------|--------------------------------------|-------------------------------------|--------------------------|-------------------------------------|-------------------------------------|------------------------------------|---------------------------------|
| <b>H1-Me<sub>2</sub></b> | 426                                  | 9.7                                                                      | 459                                 | 1700                                  | 0.20                     | 433                                  | 504                                 | 0.17                     | -2.11 (-2.11)                       | ---                                 | +0.93 <sup>[j]</sup><br>(+0.89)    | ---                             |
|                          | 407                                  | 8.7                                                                      |                                     |                                       |                          |                                      |                                     |                          |                                     |                                     |                                    |                                 |
| <b>H1-Et<sub>2</sub></b> | 427                                  | 7.6                                                                      | 462                                 | 1800                                  | 0.18                     | 433                                  | 508                                 | 0.03                     | -2.13 (-2.13)                       | ---                                 | +0.90 <sup>[j]</sup><br>(+0.88)    | +1.57 <sup>[j]</sup><br>(+1.52) |
|                          | 408                                  | 6.9                                                                      |                                     |                                       |                          |                                      |                                     |                          |                                     |                                     |                                    |                                 |
| <b>H1-Ph<sub>2</sub></b> | 432                                  | 8.1                                                                      | 477                                 | 2200                                  | 0.24                     | 438                                  | 555                                 | 0.23                     | -1.99 (-1.99)                       | ---                                 | +1.09 <sup>[j]</sup><br>(+1.01)    | ---                             |
|                          | 412                                  | 8.0                                                                      |                                     |                                       |                          |                                      |                                     |                          |                                     |                                     |                                    |                                 |
| <b>H2-Me<sub>4</sub></b> | 403                                  | 12.6                                                                     | 443                                 | 2250                                  | 0.43                     | 413                                  | 465                                 | 0.08                     | (-2.24)                             | ---                                 | +0.86 <sup>[j]</sup><br>(+0.82)    | +1.22 <sup>[j]</sup><br>(+1.17) |
|                          |                                      |                                                                          |                                     |                                       |                          |                                      |                                     |                          |                                     |                                     |                                    |                                 |
| <b>H2-Ph<sub>4</sub></b> | 406                                  | 19.7                                                                     | 446                                 | 2200                                  | 0.47                     | 412                                  | 459                                 | 0.25                     | -2.09 (-2.09)                       | (-2.31)                             | +1.08 <sup>[j]</sup><br>(+1.14)    | ---                             |
|                          |                                      |                                                                          |                                     |                                       |                          |                                      |                                     |                          |                                     |                                     |                                    |                                 |

[a] Absorption maximum in  $\text{CH}_2\text{Cl}_2$  solution. [b] Molar absorption coefficient. [c] Fluorescence maximum in  $\text{CH}_2\text{Cl}_2$  solution. [d] Relative fluorescence quantum yields determined by the optical dilution method. [e] Absorption maximum in the thin film [f] Fluorescence maximum for a powder sample. [g] Effective quantum yield for powders without correction for reabsorption;  $\Phi_{\text{fl}}$  error < 2%. [h] Redox potentials were measured in dry  $\text{CH}_2\text{Cl}_2$  ( $c \sim 10^{-4} - 10^{-5} \text{ M}$ ) at a scan rate of  $100 \text{ mV s}^{-1}$  and with 50% of iR compensation; supporting electrolyte  $\text{Bu}_4\text{NPF}_6$  ( $c = 0.1 \text{ M}$ ). Measurements were calibrated vs. the ferrocenium/ferrocene ( $\text{Fc}^+/\text{Fc}$ ) redox couple as an internal standard. The values in parentheses correspond to DPV and SW measurements. [j] Peak potential.

## Absorption and Emission in the Solid State

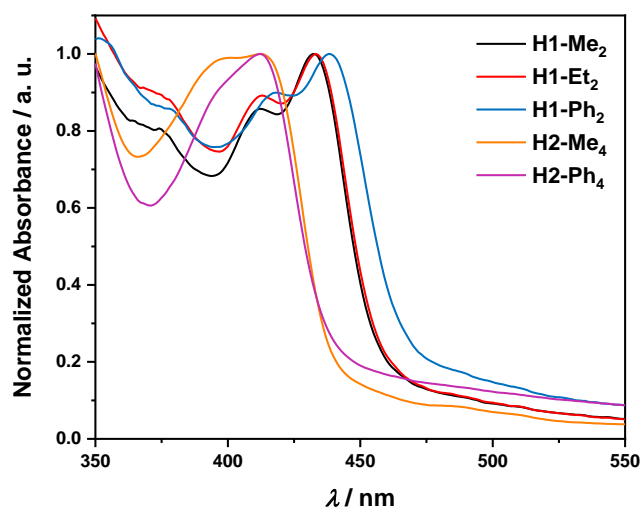

Figure S68. Absorption spectra of **H1-Me<sub>2</sub>** (black line), **H1-Et<sub>2</sub>** (red line), **H1-Ph<sub>2</sub>** (blue line), **H2-Me<sub>4</sub>** (orange line), and **H2-Ph<sub>4</sub>** (purple line) in spin-coated thin films (from  $\text{CHCl}_3$  for **H1-Me<sub>2</sub>**, **H1-Et<sub>2</sub>**, **H2-Ph<sub>4</sub>** and  $\text{CH}_2\text{Cl}_2$  for **H1-Ph<sub>2</sub>**, **H2-Me<sub>4</sub>**,  $9.8 \times 10^{-3} - 1.9 \times 10^{-2} \text{ M}$ , 2000 rpm, 60 sec) on quartz substrates normalized to the 0-0 vibronic progression.

## SUPPORTING INFORMATION

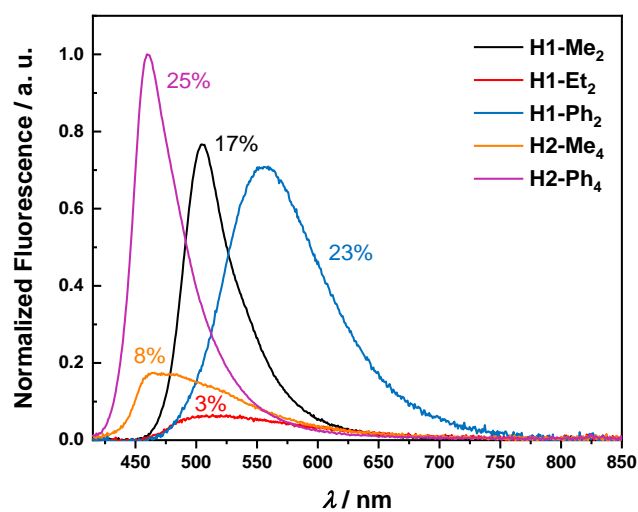

**Figure S69.** Fluorescence spectra of **H1-Me<sub>2</sub>** (black line), **H1-Et<sub>2</sub>** (red line), **H1-Ph<sub>2</sub>** (blue line), **H2-Me<sub>4</sub>** (orange line), and **H2-Ph<sub>4</sub>** (purple line) of amorphous powders upon excitation at  $\lambda_{\text{ex}}$  of 405 nm for **H1-Me<sub>2</sub>** and **H1-Et<sub>2</sub>**, 410 nm for **H1-Ph<sub>2</sub>**, and 380 nm for **H2-Me<sub>4</sub>** and **H2-Ph<sub>4</sub>**. The spectra are scaled to their absolute quantum yields determined by an integrating sphere setup.

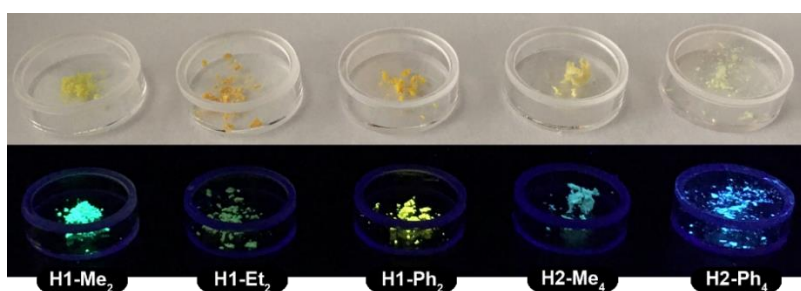

**Figure S70.** Photographs of the powders of **H1** and **H2** upon ambient (top) and UV (bottom) irradiation.

## Cyclic Voltammetry and Pulse Technique

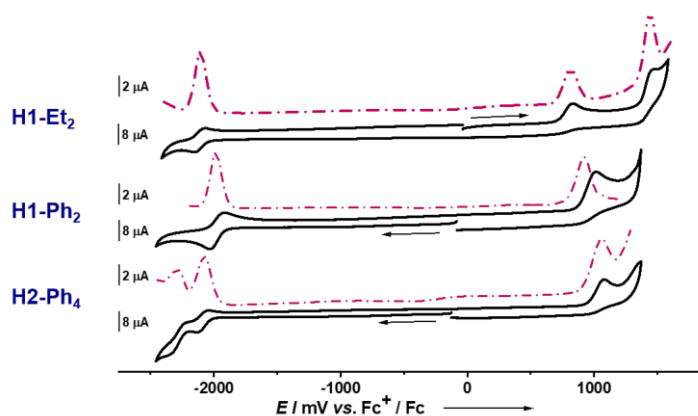

**Figure S71.** Cyclic (solid lines) and differential pulse or square-wave (dashed lines) voltammograms of **H1-Et<sub>2</sub>**, **H1-Ph<sub>2</sub>**, and **H2-Ph<sub>4</sub>** in  $\text{CH}_2\text{Cl}_2$  with  $\text{Bu}_4\text{NPF}_6$  as a supporting electrolyte and calibrated versus the ferrocenium/ferrocene ( $\text{Fc}^+/\text{Fc}$ ) redox couple as an internal standard.

## SUPPORTING INFORMATION

## 6. Resolution of Enantiomers

## Analytical HPLC

Chiral resolution of racemates of **H1-Me<sub>2</sub>**, **H1-Et<sub>2</sub>** and **H1-Ph<sub>2</sub>** into their corresponding enantiomers was performed by HPLC using columns with a chiral stationary phase from Dr. Maisch GmbH (ReproSil Chiral-MIF).

Samples of helicenes (**(rac)-H1-Me<sub>2</sub>** and (**(rac)-H1-Et<sub>2</sub>**) were dissolved in *n*-hexane/CH<sub>2</sub>Cl<sub>2</sub> (70:30), injected on a column with a chiral stationary phase (ReproSil Chiral-MIF, 250 × 4.6 mm) and eluted with *n*-hexane/CH<sub>2</sub>Cl<sub>2</sub> (93:7) at room temperature with a flow rate of 1 mL min<sup>-1</sup>. A sample of (**(rac)-H1-Ph<sub>2</sub>**) was dissolved in *n*-hexane/CH<sub>2</sub>Cl<sub>2</sub> (70:30), injected on a column with a chiral stationary phase (ReproSil Chiral-MIF, 250 × 4.6 mm) and eluted in *n*-hexane/CH<sub>2</sub>Cl<sub>2</sub> (85:15) at room temperature with a flow rate of 1 mL min<sup>-1</sup>.

## Semipreparative HPLC

Samples of helicenes (**(rac)-H1-Me<sub>2</sub>** and (**(rac)-H1-Et<sub>2</sub>**) were dissolved in *n*-hexane/CH<sub>2</sub>Cl<sub>2</sub> (85:15), injected on a column (0.83 mg mL<sup>-1</sup>) with a chiral stationary phase (ReproSil Chiral-MIF, 250 × 10 mm) and eluted with *n*-hexane/CH<sub>2</sub>Cl<sub>2</sub> (85:15). A sample of helicene (**(rac)-H1-Ph<sub>2</sub>**) was dissolved in *n*-hexane/CH<sub>2</sub>Cl<sub>2</sub> (70:30), injected on a column with a chiral stationary phase (ReproSil Chiral-MIF, 250 × 10 mm) and eluted with the same solvent system.

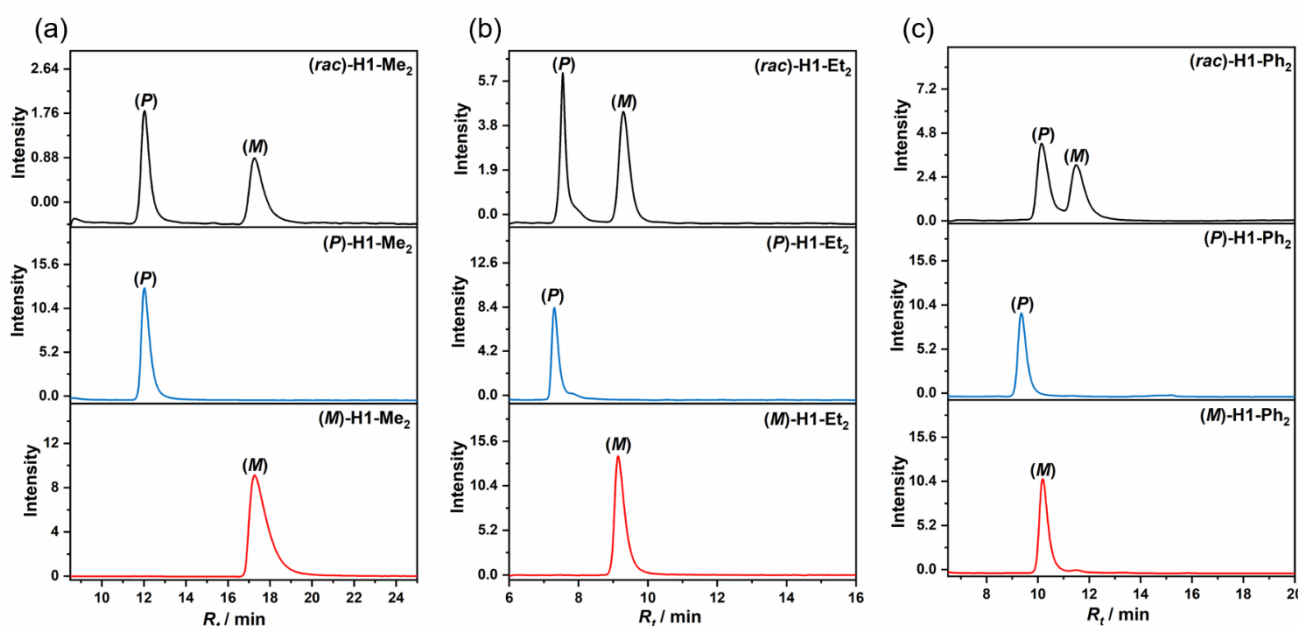

Figure S72. Chromatograms of a) **H1-Me<sub>2</sub>**, b) **H1-Et<sub>2</sub>**, and c) **H1-Ph<sub>2</sub>**: racemates (top) and (*P*)- (middle), and (*M*)-enantiomers (bottom).

Table S2. Parameters for chiral resolution of enantiomers.

| Compound                           | Column <sup>[a]</sup> | Eluent:<br><i>n</i> -hexane/CH <sub>2</sub> Cl <sub>2</sub> | First fraction | Second fraction | $\alpha$ <sup>[b]</sup> | $R_S$ <sup>[c]</sup> |
|------------------------------------|-----------------------|-------------------------------------------------------------|----------------|-----------------|-------------------------|----------------------|
| ( <b>(rac)-H1-Me<sub>2</sub></b> ) | ReproSil Chiral-MIF   | 93:7                                                        | <i>P</i>       | <i>M</i>        | 2.28                    | 6.25                 |
| ( <b>(rac)-H1-Et<sub>2</sub></b> ) | ReproSil Chiral-MIF   | 93:7                                                        | <i>P</i>       | <i>M</i>        | 1.56                    | 3.62                 |
| ( <b>(rac)-H1-Ph<sub>2</sub></b> ) | ReproSil Chiral-MIF   | 85:15                                                       | <i>P</i>       | <i>M</i>        | 1.23                    | 1.37                 |

[a] Dr-Maisch GmbH, ReproSil Chiral-MIF (250 × 4.6 mm). Sample injection: 20  $\mu$ L of each racemate (**(rac)-H1-Me<sub>2</sub>**, (**(rac)-H1-Et<sub>2</sub>**) and (**(rac)-H1-Ph<sub>2</sub>**) in *n*-hexane/CH<sub>2</sub>Cl<sub>2</sub> (7:3, ~1 mg / 2.5 mL). Separation conditions: eluent, *n*-hexane/CH<sub>2</sub>Cl<sub>2</sub>, flow rate 1 mL/min, 20 °C. [b] Selectivity parameter:  $\alpha = (t_{R2} - t_{R0}) / (t_{R1} - t_{R0})$ , where  $t_{R0}$ ,  $t_{R1}$  and  $t_{R2}$  are elution times for void volume, first fraction and second fraction, respectively. [c] Resolution parameter:  $R_S = 2(t_{R2} - t_{R1}) / (w_2 + w_1)$ , where  $w_1$  and  $w_2$  denote peak widths for the first and second fractions, respectively.

## 7. Interconversion Barrier

The perfect baseline separation of the *P*- and *M*-enantiomers of **H1-Me<sub>2</sub>** (see Section 4) allowed for the determination of the activation parameters for racemization by time-dependent HPLC measurements. To this end, an enantiopure sample of (**(P)-H1-Me<sub>2</sub>**) (0.07 mg) was dissolved in 1,2-dichlorobenzene (0.60 mL) and heated at 180 °C. Aliquots (20  $\mu$ L) were periodically removed from the solution and analyzed by HPLC on a chiral stationary phase (ReproSil Chiral-MIF) at room temperature to determine the enantiomeric ratio.

## SUPPORTING INFORMATION

The sample proved chemically stable, as no decomposition was observed over a period of 5 h.

Our studies showed that the compound is configurationally stable at room temperature over a long period of time. In addition, we did not notice any isomerization even upon heating the sample at 160 °C for 20 min. Thus, the racemization process during the resolution by HPLC can be neglected.

*P-M* isomerization is a reversible unimolecular reaction and follows first-order kinetics:

$$v = \frac{d(A)}{A_0} = k dt, \quad [\text{Eq. (1)}]$$

where, *A* denotes the concentration of the enantiomer which is present in excess and *A*<sub>0</sub> is the initial concentration thereof. *k* denotes the reaction rate constant. Integration of the first-order rate law yields:

$$\ln \frac{A}{A_0} = -kt \quad [\text{Eq. (2)}]$$

Thus, the rate constant *k* at a given temperature can be determined from the exponential decay of the *A/A*<sub>0</sub> value over time.

$$\frac{A}{A_0} = e^{-kt} \quad [\text{Eq. (3)}]$$

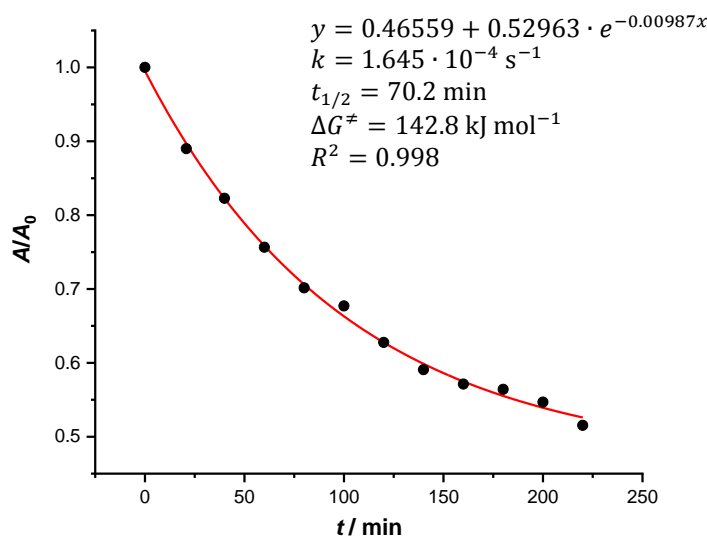

**Figure S73.** Exponential decay of the *A/A*<sub>0</sub> value for (*P*)-**H1-Me**<sub>2</sub> at 180 °C in 1,2-dichlorobenzene over time.

Half-life *t*<sub>1/2</sub> can be calculated from the following equation:

$$t_{1/2} = \frac{\ln 2}{k} \quad [\text{Eq. (4)}]$$

The free activation enthalpy of racemization is determined from the Eyring equation:

$$\Delta G^\ddagger = -RT \ln \frac{hk}{\sigma k_B T} \quad [\text{Eq. (5)}]$$

Where *R*, *T*, *h*, *k*, *k*<sub>B</sub> are absolute temperature, gas constant, Planck's constant, rate constant, and Boltzmann constant, respectively. Parameter *σ* was assumed as 0.5, as the probability of conversion to *P*- or *M*-enantiomer is equal.

## 8. Computations

DFT calculations were performed using the Gaussian 09 program package<sup>[11]</sup> with B3LYP<sup>[12]</sup> as a functional and def2-TZVP<sup>[13]</sup> as a basis set with Grimme's D3BJ dispersion correction.<sup>[14]</sup> CH<sub>2</sub>Cl<sub>2</sub> was used as a solvent for calculations (PCM model). The structures were geometry optimized followed by frequency calculations on the optimized structure. The optimized structures were proven to be minima. (*P*)-**H1-Me**<sub>2</sub>, (*P*)-**H1-Ph**<sub>2</sub>, and (*M,M*)-**H2-Me**<sub>4</sub> had no imaginary frequency. Two small imaginary frequencies of  $-2i$ . And  $-3i$  cm<sup>-1</sup>, were obtained for (*M,M*)-**H2-Ph**<sub>4</sub> and are considered most likely to be artifacts. Contour plots of selected Kohn–Sham orbitals are presented in Figure S74.

Time-dependent (TD)-DFT calculations were carried out on the optimized structures employing a hybrid exchange–correlation functional using the Coulomb-attenuating method (CAM-B3LYP)<sup>[15]</sup> with Grimme's D3BJ dispersion correction and def2-TZVP as a basis set. CH<sub>2</sub>Cl<sub>2</sub> was used as a solvent for calculations (PCM model). The most stable conformations of **H2** compounds were considered for calculations. The excited state energies as well as the corresponding oscillator strengths (*f*) are listed in Tables S3–S6. The UV/Vis spectra (Figure S75) were simulated using the GaussView 5<sup>[16]</sup> visualization software package. A half-width of 2000 cm<sup>-1</sup> was assumed for a proper simulation. The ECD spectra (Figure S76) were simulated using the GaussSum-3.0.2.<sup>[17]</sup> A half-width of 1600 cm<sup>-1</sup> was assumed for a proper simulation.



## SUPPORTING INFORMATION

To optimize the stable isomers of **H1-Me<sub>2</sub>** and **H2-Me<sub>4</sub>** and the transition states of the *P* to *M* interconversion process, DFT calculations were carried out employing the B3LYP functional and the def2-SVP<sup>[13]</sup> basis set together with Grimme's D3BJ dispersion correction. CH<sub>2</sub>Cl<sub>2</sub> was used as a solvent for calculations (PCM model). The character of the obtained structures has been verified by vibrational frequency analysis. (*P*)-**H1-Me<sub>2</sub>**, (*M,M*)-**H2-Me<sub>4</sub>**, **LM1**, **LM2**, had no imaginary frequency. For transition states **TS** (**H1-Me<sub>2</sub>**), **TS1** (**H2-Me<sub>4</sub>**), **TS2** (**H2-Me<sub>4</sub>**), and **TS3** (**H2-Me<sub>4</sub>**) one imaginary frequency was obtained in each case.

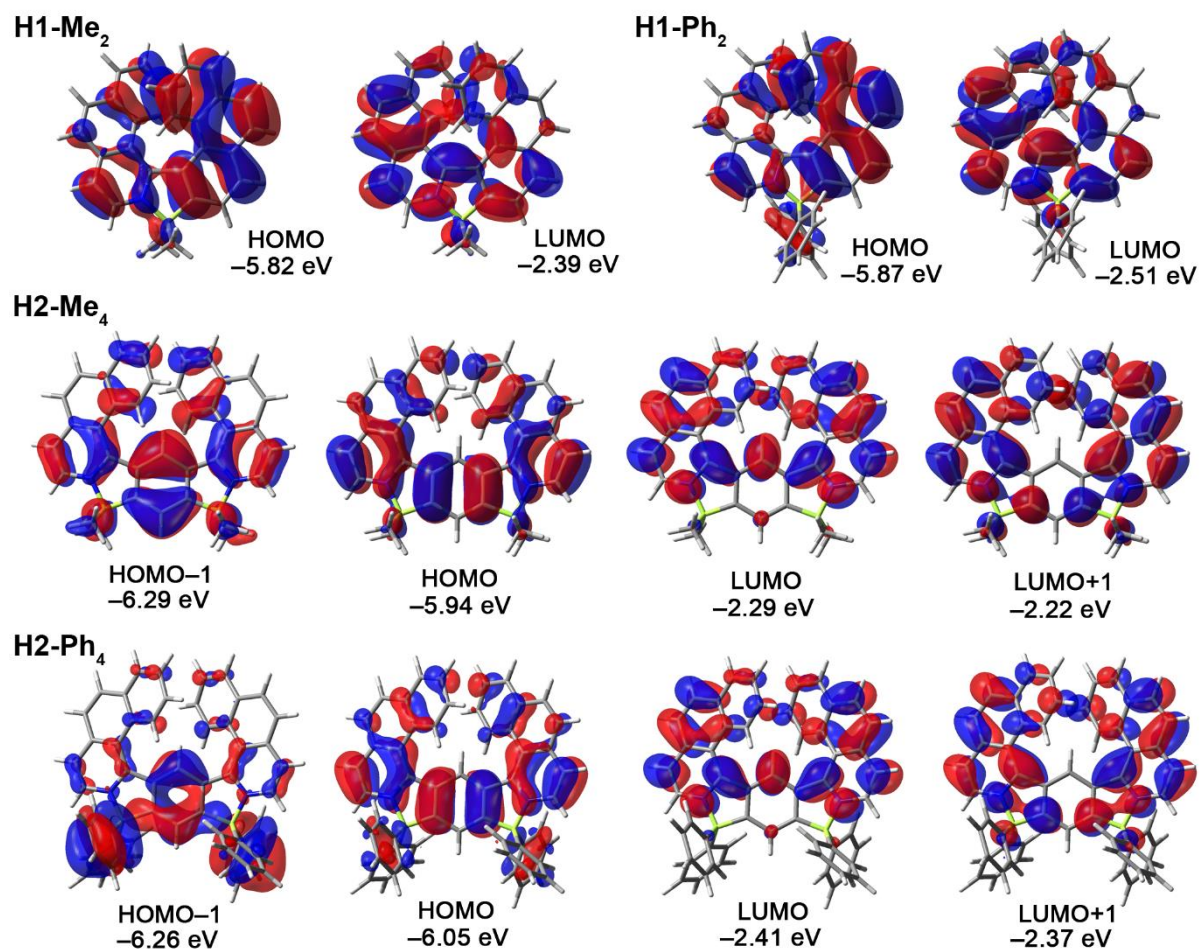

**Figure S74.** Contour plots of selected Kohn-Sham orbitals (isovalue=0.02 a.u.) of **H1-Me<sub>2</sub>**, **H1-Ph<sub>2</sub>**, **H2-Me<sub>4</sub>**, and **H2-Ph<sub>4</sub>** calculated at the B3LYP-D3BJ/def2-TZVP (solvent CH<sub>2</sub>Cl<sub>2</sub>, PCM model) level of theory.

## SUPPORTING INFORMATION

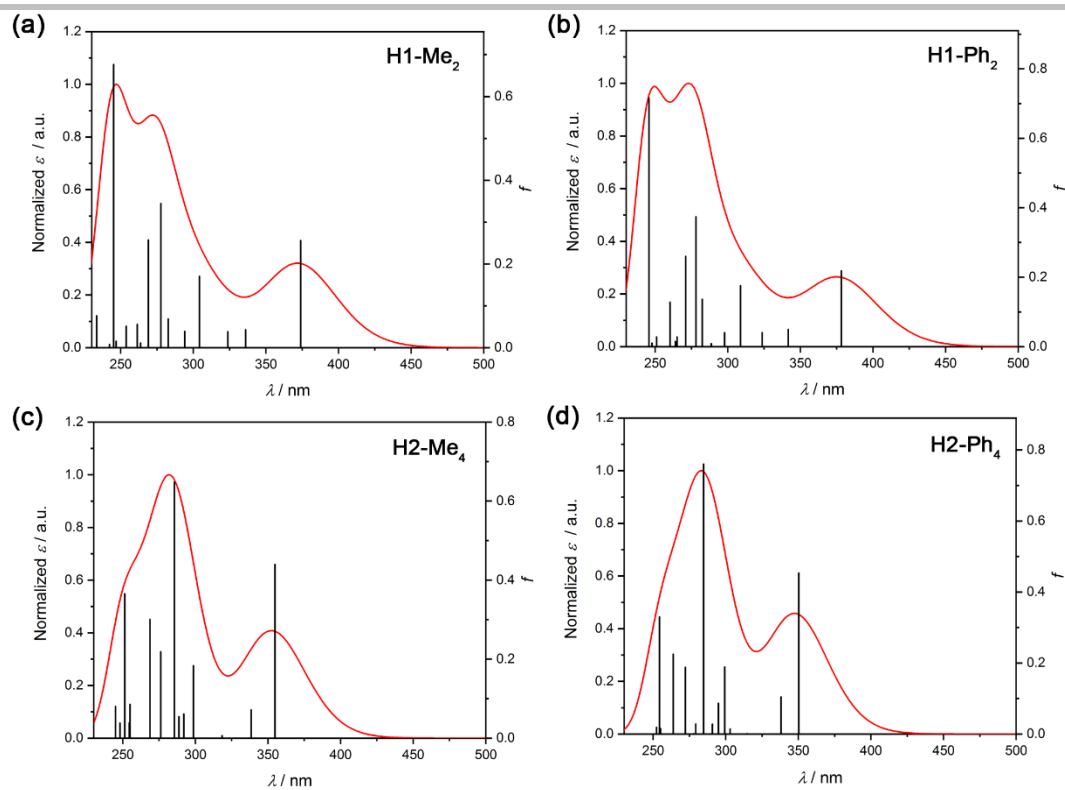

**Figure S75.** TD-DFT-calculated UV/Vis absorption spectra of **H1-Me<sub>2</sub>**, **H1-Ph<sub>2</sub>**, **H2-Me<sub>4</sub>**, and **H2-Ph<sub>4</sub>** at the CAM-B3LYP-D3BJ/def2-TZVP (solvent CH<sub>2</sub>Cl<sub>2</sub>) level of theory.

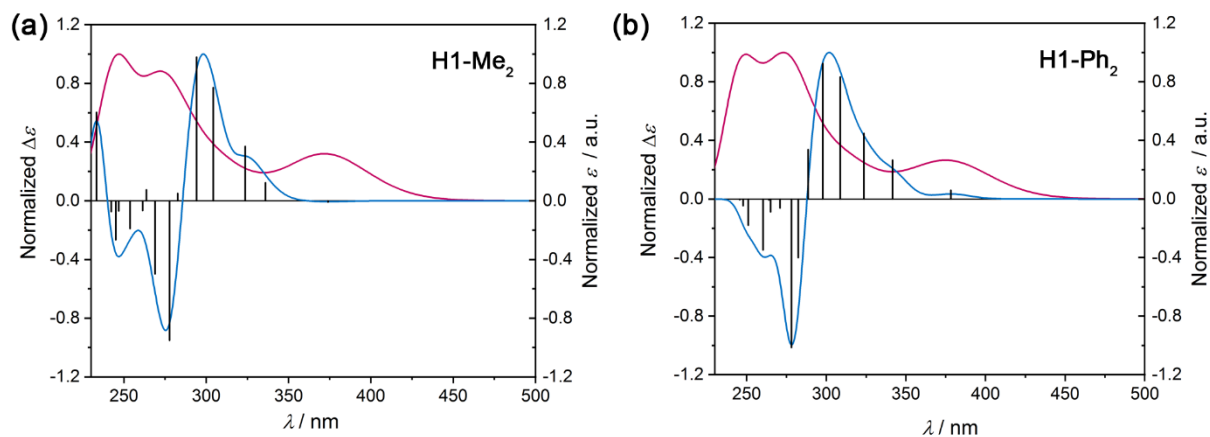

**Figure S76.** Simulated CD spectra (blue lines) and UV/Vis absorption spectra (magenta lines) of (a) **H1-Me<sub>2</sub>** and (b) **H1-Ph<sub>2</sub>** (CAM-B3LYP-D3BJ/def2-TZVP, CH<sub>2</sub>Cl<sub>2</sub>, PCM model).

## SUPPORTING INFORMATION

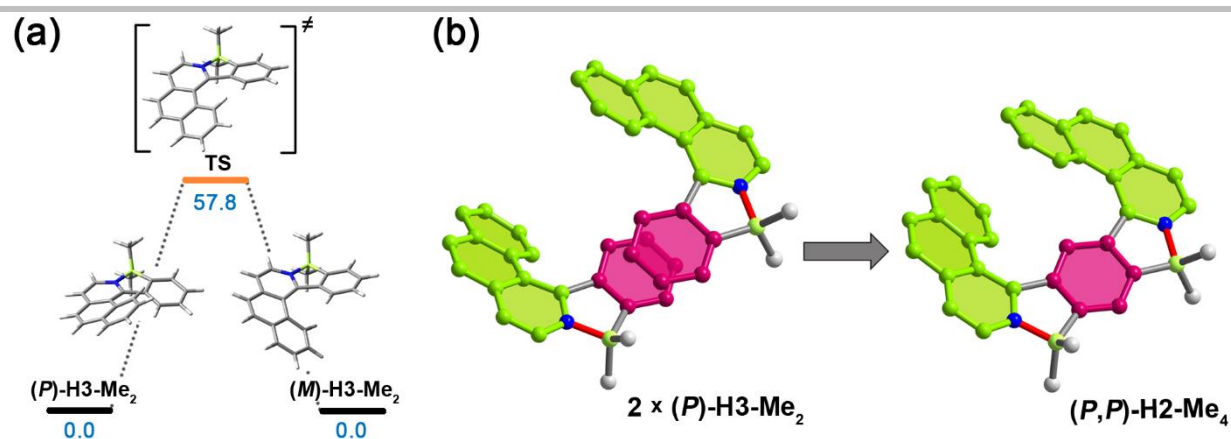

**Figure S77.** a) *P-M* interconversion pathway of **H3-Me<sub>2</sub>**. The relative Gibbs free energy is given in kJ mol<sup>-1</sup>. b) Compound **H2-Me<sub>4</sub>** as a superposition of two azabora[5]helicenes **H3-Me<sub>2</sub>** with a joint phenyl ring.

**Cartesian coordinates (B3LYP-D3BJ/def2-TZVP, CH<sub>2</sub>Cl<sub>2</sub>, PCM model)**

**(P)-H1-Me<sub>2</sub>**

Total energy of the optimized structure  $E = -1198.59859520$  Hartree

| Symbol | X         | Y         | Z         |
|--------|-----------|-----------|-----------|
| C      | 1.230530  | -0.824071 | 0.025604  |
| C      | 1.297817  | 0.646738  | -0.052916 |
| N      | 2.582126  | 1.015454  | -0.269754 |
| B      | 3.622109  | -0.181132 | 0.013964  |
| C      | 2.524539  | -1.313748 | 0.258699  |
| C      | 2.700404  | -2.657268 | 0.614121  |
| C      | 1.606181  | -3.476575 | 0.755724  |
| C      | 0.318008  | -3.037700 | 0.377807  |
| C      | 0.128927  | -1.719589 | -0.120209 |
| C      | 0.317019  | 1.666857  | 0.119369  |
| C      | 0.650922  | 2.958072  | -0.372211 |
| C      | 1.979897  | 3.240633  | -0.743834 |
| C      | 2.928662  | 2.271106  | -0.595580 |
| C      | -0.798894 | -3.923020 | 0.487000  |
| C      | -2.033174 | -3.555122 | 0.066842  |
| C      | -2.222706 | -2.317050 | -0.617360 |
| C      | -1.127062 | -1.423868 | -0.775890 |
| C      | -0.965181 | 1.492987  | 0.769691  |
| C      | -1.948387 | 2.509906  | 0.626446  |
| C      | -1.619321 | 3.724763  | -0.046825 |
| C      | -0.357331 | 3.964133  | -0.474345 |

## SUPPORTING INFORMATION

---

|   |           |           |           |
|---|-----------|-----------|-----------|
| C | -1.266766 | 0.405913  | 1.610516  |
| C | -2.508074 | 0.272622  | 2.190263  |
| C | -3.507493 | 1.228180  | 1.962159  |
| C | -3.220336 | 2.339610  | 1.205039  |
| C | -3.468465 | -1.998307 | -1.194620 |
| C | -3.625144 | -0.870380 | -1.964521 |
| C | -2.518442 | -0.044484 | -2.214170 |
| C | -1.301426 | -0.322332 | -1.637196 |
| C | 4.497831  | 0.228964  | 1.320490  |
| C | 4.529663  | -0.473928 | -1.300232 |
| H | 3.694916  | -3.037003 | 0.816647  |
| H | 1.716533  | -4.492267 | 1.117066  |
| H | 2.250532  | 4.227821  | -1.089478 |
| H | 3.982085  | 2.447598  | -0.754798 |
| H | -0.633900 | -4.898432 | 0.927915  |
| H | -2.880575 | -4.219174 | 0.182755  |
| H | -2.388703 | 4.479267  | -0.153433 |
| H | -0.087688 | 4.917931  | -0.908478 |
| H | -0.511383 | -0.333999 | 1.816696  |
| H | -2.709585 | -0.578258 | 2.827412  |
| H | -4.487334 | 1.105738  | 2.404324  |
| H | -3.963226 | 3.114095  | 1.061349  |
| H | -4.299501 | -2.675283 | -1.038568 |
| H | -4.586105 | -0.638104 | -2.404739 |
| H | -2.619174 | 0.812582  | -2.867073 |
| H | -0.459652 | 0.311638  | -1.864806 |
| H | 5.152931  | 1.085227  | 1.127562  |
| H | 3.877042  | 0.475689  | 2.187527  |
| H | 5.142405  | -0.607000 | 1.609487  |
| H | 5.169023  | -1.345920 | -1.132548 |
| H | 3.929274  | -0.678900 | -2.192093 |
| H | 5.193468  | 0.365976  | -1.533436 |

---

**(P)-H1-Ph<sub>2</sub>**Total energy of the optimized structure  $E = -1582.25521135$  Hartree

---

| Symbol | X         | Y         | Z         |
|--------|-----------|-----------|-----------|
| C      | -0.033466 | -0.760451 | 0.273525  |
| C      | 0.006762  | 0.582284  | -0.336275 |

---

SUPPORTING INFORMATION

---

|   |           |           |           |
|---|-----------|-----------|-----------|
| N | 1.283015  | 0.867082  | -0.686892 |
| B | 2.340753  | -0.102853 | 0.031457  |
| C | 1.267389  | -1.110998 | 0.657297  |
| C | 1.475126  | -2.224480 | 1.477464  |
| C | 0.398116  | -2.956571 | 1.916319  |
| C | -0.900229 | -2.706682 | 1.420017  |
| C | -1.118614 | -1.663828 | 0.478988  |
| C | -0.988523 | 1.579662  | -0.538680 |
| C | -0.680236 | 2.602260  | -1.477859 |
| C | 0.640291  | 2.744989  | -1.946377 |
| C | 1.607870  | 1.914228  | -1.461464 |
| C | -1.999850 | -3.507594 | 1.859361  |
| C | -3.243817 | -3.334762 | 1.351567  |
| C | -3.461907 | -2.433870 | 0.266161  |
| C | -2.384233 | -1.644468 | -0.222015 |
| C | -2.262292 | 1.639489  | 0.147505  |
| C | -3.263375 | 2.519119  | -0.347054 |
| C | -2.961157 | 3.401999  | -1.427268 |
| C | -1.707487 | 3.483547  | -1.931902 |
| C | -2.536431 | 0.934286  | 1.333390  |
| C | -3.769797 | 1.009368  | 1.940015  |
| C | -4.786578 | 1.802397  | 1.391386  |
| C | -4.526148 | 2.559641  | 0.273239  |
| C | -4.717473 | -2.364714 | -0.370728 |
| C | -4.899682 | -1.597245 | -1.496522 |
| C | -3.810035 | -0.903667 | -2.044782 |
| C | -2.583955 | -0.935270 | -1.422959 |
| C | 3.105321  | 0.734687  | 1.185826  |
| C | 3.301798  | -0.771843 | -1.083897 |
| C | 2.917674  | -1.923087 | -1.783453 |
| C | 3.704754  | -2.466397 | -2.793915 |
| C | 4.910410  | -1.863867 | -3.138405 |
| C | 5.315298  | -0.717803 | -2.462894 |
| C | 4.519930  | -0.187019 | -1.451731 |
| C | 2.639798  | 1.950447  | 1.699300  |
| C | 3.272306  | 2.591321  | 2.761391  |
| C | 4.396642  | 2.024450  | 3.349662  |
| C | 4.877764  | 0.812841  | 2.862525  |

## SUPPORTING INFORMATION

|   |           |           |           |
|---|-----------|-----------|-----------|
| C | 4.240102  | 0.185427  | 1.798491  |
| H | 2.477813  | -2.480590 | 1.796679  |
| H | 0.530977  | -3.769705 | 2.620001  |
| H | 0.890388  | 3.535962  | -2.638256 |
| H | 2.657464  | 2.028963  | -1.686704 |
| H | -1.813716 | -4.252065 | 2.623502  |
| H | -4.077944 | -3.922523 | 1.713806  |
| H | -3.744861 | 4.052669  | -1.794751 |
| H | -1.458859 | 4.211530  | -2.692744 |
| H | -1.766189 | 0.332182  | 1.785994  |
| H | -3.951160 | 0.450941  | 2.848705  |
| H | -5.759318 | 1.841093  | 1.863365  |
| H | -5.283131 | 3.217974  | -0.133830 |
| H | -5.535079 | -2.949856 | 0.032081  |
| H | -5.867608 | -1.555524 | -1.978692 |
| H | -3.930722 | -0.346012 | -2.964208 |
| H | -1.754824 | -0.417611 | -1.877858 |
| H | 3.378891  | -3.360599 | -3.311749 |
| H | 6.252360  | -0.239214 | -2.721365 |
| H | 2.884430  | 3.533551  | 3.129798  |
| H | 5.752996  | 0.358035  | 3.311029  |
| H | 5.527981  | -2.284255 | -3.922327 |
| H | 1.981896  | -2.408249 | -1.532043 |
| H | 4.861198  | 0.698805  | -0.929619 |
| H | 4.637521  | -0.753484 | 1.431520  |
| H | 1.759967  | 2.416625  | 1.271584  |
| H | 4.892283  | 2.519087  | 4.175535  |

**(M,M)-H2-Me4**

Total energy of the optimized structure  $E = -1549.99642702$  Hartree

| Symbol | X         | Y        | Z        |
|--------|-----------|----------|----------|
| C      | 1.190126  | 1.322517 | 0.123702 |
| C      | 1.211934  | 2.737057 | 0.062677 |
| C      | 0.000031  | 3.418522 | 0.000099 |
| C      | -1.211896 | 2.737080 | 0.062820 |
| C      | -1.190108 | 1.322546 | 0.123713 |
| C      | 0.000000  | 0.614465 | 0.000038 |
| C      | 2.559244  | 0.792423 | 0.150282 |

SUPPORTING INFORMATION

---

|   |           |           |           |
|---|-----------|-----------|-----------|
| C | -2.559229 | 0.792449  | 0.150233  |
| C | 3.053074  | 0.542385  | 0.222570  |
| C | 4.373861  | 0.756401  | 0.253742  |
| C | 5.212961  | 0.350056  | 0.495079  |
| C | 4.725029  | 1.610675  | 0.312785  |
| N | 3.423793  | 1.812374  | 0.041343  |
| C | 2.314982  | -1.686772 | 0.721534  |
| C | 2.783115  | -2.992230 | 0.407125  |
| C | 4.042158  | -3.152371 | 0.247410  |
| C | 4.837003  | -2.085035 | 0.498018  |
| N | -3.423770 | 1.812426  | 0.041357  |
| C | -4.725006 | 1.610741  | 0.312768  |
| C | -5.212965 | 0.350126  | 0.495040  |
| C | -4.373885 | 0.756344  | 0.253706  |
| C | -3.053069 | 0.542341  | 0.222548  |
| C | 0.924159  | -3.976110 | 1.605768  |
| C | 0.534491  | -2.697434 | 2.027396  |
| B | 2.715806  | 3.270667  | 0.007486  |
| B | -2.715760 | 3.270711  | 0.007543  |
| C | 3.059438  | 4.089919  | -1.350664 |
| C | -3.215211 | 4.027895  | -1.356537 |
| C | 1.220281  | -1.582480 | 1.600949  |
| C | 2.047997  | -4.117929 | 0.827345  |
| C | -4.837076 | -2.084968 | 0.497944  |
| C | -4.042246 | -3.152317 | 0.247353  |
| C | -2.783175 | -2.992192 | 0.407137  |
| C | -2.314992 | -1.686748 | 0.721519  |
| C | -2.048082 | -4.117915 | 0.827342  |
| C | 0.924219  | -3.976133 | -1.605735 |
| C | 0.534502  | -2.697466 | -2.027343 |
| C | -1.220266 | -1.582491 | -1.600904 |
| H | 0.364083  | -4.845850 | -1.921673 |
| H | 0.306991  | -2.582575 | -2.697564 |
| H | 0.922826  | 0.611911  | -1.964286 |
| H | -2.402593 | -5.102022 | 0.547699  |
| H | -4.379764 | -4.155380 | 0.476570  |
| H | -5.828760 | -2.214502 | 0.911048  |
| H | -6.235436 | 0.198012  | 0.809516  |

## SUPPORTING INFORMATION

|   |           |           |           |
|---|-----------|-----------|-----------|
| H | 0.306983  | -2.582527 | 2.697638  |
| H | 0.922906  | 0.611886  | 1.964352  |
| H | 0.364005  | -4.845811 | 1.921720  |
| H | 2.402463  | -5.102049 | 0.547693  |
| H | 4.379648  | -4.155436 | 0.476661  |
| H | 5.828660  | -2.214594 | 0.911180  |
| H | 6.235414  | 0.197919  | 0.809603  |
| H | 5.329281  | 2.497467  | 0.432248  |
| H | 0.000038  | 0.457749  | 0.000117  |
| H | 0.000048  | 4.504557  | 0.000140  |
| H | -5.329256 | 2.497537  | 0.432241  |
| H | -3.025307 | 3.446937  | -2.264644 |
| H | -4.286583 | 4.255887  | -1.327137 |
| H | -2.687874 | 4.980806  | -1.464385 |
| H | 4.118728  | 4.361003  | -1.420384 |
| H | 2.799777  | 3.535613  | -2.258382 |
| H | 2.491855  | 5.025337  | -1.371442 |
| C | -3.059263 | 4.089868  | 1.350747  |
| H | -2.799787 | 3.535405  | 2.258413  |
| H | -2.491541 | 5.025197  | 1.371709  |
| H | -4.118524 | 4.361103  | 1.420404  |
| C | 3.215195  | 4.027728  | 1.356632  |
| H | 4.286554  | 4.255800  | 1.327105  |
| H | 2.687821  | 4.980582  | 1.464752  |
| H | 3.025479  | 3.446584  | 2.264651  |

**(M,M)-H2-Ph<sub>4</sub>**Total energy of the optimized structure  $E = -2317.31153905$  Hartree

| Symbol | X         | Y         | Z         |
|--------|-----------|-----------|-----------|
| C      | 1.181570  | -0.311422 | 0.091104  |
| C      | 1.249765  | 1.099299  | 0.041477  |
| C      | 0.068857  | 1.829349  | 0.010135  |
| C      | -1.163776 | 1.190721  | -0.025824 |
| C      | -1.202732 | -0.221087 | -0.081579 |
| C      | -0.037362 | -0.974442 | 0.003423  |
| C      | 2.532954  | -0.887211 | 0.060710  |
| C      | -2.594480 | -0.692731 | -0.060177 |
| C      | 2.983579  | -2.236290 | 0.084926  |
| C      | 4.277106  | -2.482395 | -0.449849 |



SUPPORTING INFORMATION

---

|   |           |           |           |
|---|-----------|-----------|-----------|
| C | 5.142154  | -1.399269 | -0.702813 |
| C | 4.705833  | -0.127285 | -0.476070 |
| N | 3.424554  | 0.107730  | -0.143661 |
| C | 2.225018  | -3.366000 | 0.586013  |
| C | 2.634510  | -4.678018 | 0.222284  |
| C | 3.860511  | -4.864204 | -0.486140 |
| C | 4.682630  | -3.819381 | -0.744191 |
| N | -3.408878 | 0.367342  | 0.139389  |
| C | -4.707444 | 0.231245  | 0.459653  |
| C | -5.242577 | -1.003515 | 0.679729  |
| C | -4.461021 | -2.149554 | 0.432901  |
| C | -3.147531 | -2.003326 | -0.090188 |
| C | 0.789536  | -5.626041 | 1.469120  |
| C | 0.460196  | -4.345867 | 1.934096  |
| B | 2.774455  | 1.578137  | -0.005283 |
| B | -2.647456 | 1.784049  | 0.011435  |
| C | 3.175322  | 2.458324  | -1.300120 |
| C | 3.219559  | 2.223322  | 1.409856  |
| C | -2.992281 | 2.687882  | 1.305809  |
| C | -3.026611 | 2.464083  | -1.406411 |
| C | 1.169693  | -3.244987 | 1.509622  |
| C | 1.878065  | -5.787862 | 0.645570  |
| C | -4.971360 | -3.451317 | 0.721755  |
| C | -4.229541 | -4.556306 | 0.471659  |
| C | -2.986578 | -4.465098 | -0.225654 |
| C | -2.474839 | -3.188538 | -0.586225 |
| C | -2.314345 | -5.629935 | -0.643209 |
| C | -1.210864 | -5.552707 | -1.459097 |
| C | -0.781946 | -4.301968 | -1.922989 |
| C | -1.407906 | -3.149663 | -1.503516 |
| C | 2.441387  | 2.377275  | -2.490199 |
| C | 2.807858  | 3.085756  | -3.629957 |
| C | 3.933495  | 3.903170  | -3.610421 |
| C | 4.680958  | 4.003474  | -2.442077 |
| C | 4.300521  | 3.291465  | -1.308263 |
| C | 3.888111  | 1.520319  | 2.416882  |
| C | 4.189149  | 2.104778  | 3.645598  |
| C | 3.819071  | 3.418606  | 3.903783  |

SUPPORTING INFORMATION

---

|   |           |           |           |
|---|-----------|-----------|-----------|
| C | 3.147335  | 4.139510  | 2.919801  |
| C | 2.857626  | 3.547077  | 1.697116  |
| C | -4.043652 | 3.612507  | 1.303051  |
| C | -4.381131 | 4.346400  | 2.436547  |
| C | -3.663620 | 4.175684  | 3.615474  |
| C | -2.610575 | 3.266848  | 3.645876  |
| C | -2.286966 | 2.537242  | 2.506449  |
| C | -3.723892 | 1.811335  | -2.427521 |
| C | -3.962422 | 2.418288  | -3.659061 |
| C | -3.498852 | 3.704481  | -3.905306 |
| C | -2.796197 | 4.374685  | -2.907193 |
| C | -2.569107 | 3.760357  | -1.682057 |
| H | -0.696818 | -6.451913 | -1.770334 |
| H | 0.041709  | -4.238058 | -2.621458 |
| H | -1.085764 | -2.200989 | -1.902164 |
| H | -2.700667 | -6.591639 | -0.329886 |
| H | -4.600891 | -5.538753 | 0.734995  |
| H | -5.953652 | -3.529673 | 1.168524  |
| H | -6.258861 | -1.104255 | 1.032167  |
| H | -0.351867 | -4.218934 | 2.637490  |
| H | 0.923212  | -2.274392 | 1.909532  |
| H | 0.210570  | -6.483112 | 1.785229  |
| H | 2.186918  | -6.776530 | 0.330409  |
| H | 4.152600  | -5.872176 | -0.753073 |
| H | 5.651366  | -3.972706 | -1.201045 |
| H | 6.144472  | -1.577504 | -1.064440 |
| H | 5.329152  | 0.744085  | -0.607590 |
| H | -0.077530 | -2.045532 | -0.000907 |
| H | 0.110117  | 2.913002  | 0.011657  |
| H | -5.263002 | 1.147806  | 0.587839  |
| H | -1.458617 | 1.839989  | 2.549772  |
| H | -2.039470 | 3.129682  | 4.556330  |
| H | -3.918243 | 4.748001  | 4.498867  |
| H | -5.200802 | 5.054051  | 2.398923  |
| H | -4.605580 | 3.770742  | 0.390129  |
| H | 2.339359  | 4.128529  | 0.943501  |
| H | 2.850360  | 5.164554  | 3.106937  |
| H | 4.050300  | 3.876535  | 4.857328  |

## SUPPORTING INFORMATION

|   |           |          |           |
|---|-----------|----------|-----------|
| H | 4.712688  | 1.530787 | 4.400984  |
| H | 4.184993  | 0.491246 | 2.251869  |
| H | 4.887831  | 3.395413 | -0.403537 |
| H | 5.557436  | 4.639867 | -2.412628 |
| H | 4.221571  | 4.459234 | -4.493913 |
| H | 2.213196  | 3.004131 | -4.531972 |
| H | 1.556750  | 1.752519 | -2.524853 |
| H | -4.091357 | 0.803867 | -2.271671 |
| H | -4.510343 | 1.883549 | -4.425859 |
| H | -3.681470 | 4.179998 | -4.860806 |
| H | -2.426576 | 5.377494 | -3.085268 |
| H | -2.024382 | 4.302272 | -0.917791 |

**Table S3.** TD-DFT-calculated UV/Vis absorption data for (*P*)-H1-Me<sub>2</sub> at the CAM-B3LYP-D3BJ/def2-TZVP (solvent CH<sub>2</sub>Cl<sub>2</sub>) level.

| Calcd. $\lambda$ [nm] | $f$    | composition                 | coefficient | contribution |
|-----------------------|--------|-----------------------------|-------------|--------------|
| 373.87                | 0.2564 | HOMO-2 $\rightarrow$ LUMO   | 0.14063     | 4%           |
|                       |        | HOMO-1 $\rightarrow$ LUMO   | 0.12976     | 3%           |
|                       |        | HOMO $\rightarrow$ LUMO     | 0.64961     | 84%          |
| 335.91                | 0.0430 | HOMO-2 $\rightarrow$ LUMO   | 0.28061     | 16%          |
|                       |        | HOMO-1 $\rightarrow$ LUMO   | 0.50706     | 51%          |
|                       |        | HOMO-1 $\rightarrow$ LUMO+2 | 0.14988     | 4%           |
|                       |        | HOMO $\rightarrow$ LUMO     | -0.10647    | 2%           |
|                       |        | HOMO $\rightarrow$ LUMO+1   | -0.28393    | 16%          |
|                       |        | HOMO $\rightarrow$ LUMO+3   | -0.10238    | 2%           |
| 323.70                | 0.0382 | HOMO-3 $\rightarrow$ LUMO+1 | -0.16898    | 6%           |
|                       |        | HOMO-2 $\rightarrow$ LUMO   | -0.27516    | 15%          |
|                       |        | HOMO-1 $\rightarrow$ LUMO   | 0.36973     | 27%          |
|                       |        | HOMO-1 $\rightarrow$ LUMO+1 | 0.23769     | 11%          |
|                       |        | HOMO $\rightarrow$ LUMO+1   | 0.39133     | 31%          |
| 304.16                | 0.1706 | HOMO-3 $\rightarrow$ LUMO   | 0.30246     | 18%          |
|                       |        | HOMO-2 $\rightarrow$ LUMO   | 0.46039     | 42%          |
|                       |        | HOMO-2 $\rightarrow$ LUMO+1 | -0.23064    | 11%          |
|                       |        | HOMO $\rightarrow$ LUMO     | -0.12845    | 3%           |
|                       |        | HOMO $\rightarrow$ LUMO+1   | 0.27167     | 15%          |
|                       |        | HOMO $\rightarrow$ LUMO+3   | 0.12898     | 3%           |
| 294.06                | 0.0391 | HOMO-3 $\rightarrow$ LUMO   | 0.32364     | 21%          |
|                       |        | HOMO-2 $\rightarrow$ LUMO   | -0.17541    | 6%           |
|                       |        | HOMO-2 $\rightarrow$ LUMO+1 | -0.20009    | 8%           |

## SUPPORTING INFORMATION

|        |        |                 |          |     |
|--------|--------|-----------------|----------|-----|
|        |        | HOMO-1 → LUMO+2 | -0.14197 | 4%  |
|        |        | HOMO-1 → LUMO+3 | 0.11075  | 2%  |
|        |        | HOMO → LUMO+1   | -0.24426 | 12% |
|        |        | HOMO → LUMO+2   | 0.43978  | 39% |
| <hr/>  |        |                 |          |     |
|        |        | HOMO-4 → LUMO   | 0.1285   | 3%  |
|        |        | HOMO-3 → LUMO   | -0.16714 | 6%  |
|        |        | HOMO-3 → LUMO+1 | 0.23187  | 11% |
|        |        | HOMO-2 → LUMO   | 0.1152   | 3%  |
| 282.60 | 0.0690 | HOMO-2 → LUMO+1 | 0.34922  | 24% |
|        |        | HOMO-1 → LUMO+2 | -0.26201 | 14% |
|        |        | HOMO → LUMO     | -0.12231 | 3%  |
|        |        | HOMO → LUMO+1   | 0.18950  | 7%  |
|        |        | HOMO → LUMO+2   | 0.27881  | 16% |
|        |        | HOMO → LUMO+4   | 0.14446  | 4%  |
| <hr/>  |        |                 |          |     |
|        |        | HOMO-3 → LUMO+1 | -0.17590 | 6%  |
|        |        | HOMO-3 → LUMO+2 | 0.12079  | 3%  |
|        |        | HOMO-2 → LUMO   | 0.15616  | 5%  |
|        |        | HOMO-2 → LUMO+1 | 0.15006  | 5%  |
| 277.61 | 0.3449 | HOMO-1 → LUMO   | -0.24944 | 12% |
|        |        | HOMO-1 → LUMO+1 | 0.33476  | 22% |
|        |        | HOMO-1 → LUMO+2 | 0.21462  | 9%  |
|        |        | HOMO → LUMO+2   | 0.26025  | 14% |
|        |        | HOMO → LUMO+3   | -0.22891 | 10% |
| <hr/>  |        |                 |          |     |
|        |        | HOMO-3 → LUMO   | 0.29257  | 17% |
|        |        | HOMO-2 → LUMO+1 | 0.29267  | 17% |
| 268.89 | 0.2577 | HOMO-1 → LUMO+1 | 0.35699  | 25% |
|        |        | HOMO-1 → LUMO+2 | -0.17379 | 6%  |
|        |        | HOMO → LUMO+1   | -0.1869  | 7%  |
|        |        | HOMO → LUMO+2   | -0.30170 | 18% |
| <hr/>  |        |                 |          |     |
|        |        | HOMO-6 → LUMO   | -0.10267 | 2%  |
|        |        | HOMO-4 → LUMO   | 0.15045  | 5%  |
|        |        | HOMO-3 → LUMO   | -0.35155 | 25% |
| 263.66 | 0.0114 | HOMO-2 → LUMO+1 | -0.32518 | 21% |
|        |        | HOMO-1 → LUMO+1 | 0.38549  | 30% |
|        |        | HOMO-1 → LUMO+2 | -0.12659 | 3%  |
|        |        | HOMO → LUMO+3   | 0.16116  | 5%  |
| <hr/>  |        |                 |          |     |
| 261.29 | 0.0560 | HOMO-4 → LUMO   | 0.37123  | 28% |
|        |        | HOMO-3 → LUMO   | 0.12164  | 3%  |

## SUPPORTING INFORMATION

|        |        |                 |          |     |
|--------|--------|-----------------|----------|-----|
|        |        | HOMO-3 → LUMO+1 | 0.29752  | 18% |
|        |        | HOMO-2 → LUMO+3 | -0.16293 | 5%  |
|        |        | HOMO-1 → LUMO+2 | 0.28102  | 16% |
|        |        | HOMO → LUMO+1   | 0.14370  | 4%  |
|        |        | HOMO → LUMO+3   | -0.19907 | 8%  |
|        |        | HOMO-6 → LUMO   | -0.34812 | 24% |
|        |        | HOMO-4 → LUMO   | 0.35406  | 25% |
|        |        | HOMO-4 → LUMO+1 | 0.23752  | 11% |
| 253.71 | 0.0518 | HOMO-3 → LUMO   | 0.11130  | 2%  |
|        |        | HOMO-3 → LUMO+1 | -0.25916 | 13% |
|        |        | HOMO-2 → LUMO+1 | 0.11931  | 3%  |
|        |        | HOMO-2 → LUMO+2 | 0.10712  | 2%  |
|        |        | HOMO-6 → LUMO   | 0.53657  | 58% |
|        |        | HOMO-6 → LUMO+2 | 0.10597  | 2%  |
| 246.79 | 0.0155 | HOMO-4 → LUMO   | 0.24483  | 12% |
|        |        | HOMO-4 → LUMO+1 | 0.15816  | 5%  |
|        |        | HOMO-3 → LUMO+1 | -0.13625 | 4%  |
|        |        | HOMO-3 → LUMO+1 | 0.11599  | 3%  |
|        |        | HOMO-2 → LUMO+1 | 0.15121  | 5%  |
| 245.00 | 0.6766 | HOMO-1 → LUMO+2 | 0.37631  | 28% |
|        |        | HOMO → LUMO+3   | 0.50935  | 52% |
|        |        | HOMO-5 → LUMO   | 0.52520  | 55% |
|        |        | HOMO-5 → LUMO+1 | 0.10573  | 2%  |
|        |        | HOMO-3 → LUMO+1 | -0.20634 | 9%  |
| 242.26 | 0.0082 | HOMO-2 → LUMO+2 | -0.12510 | 3%  |
|        |        | HOMO → LUMO+4   | 0.11797  | 3%  |
|        |        | HOMO → LUMO+5   | 0.10849  | 2%  |
|        |        | HOMO-5 → LUMO   | -0.18452 | 7%  |
|        |        | HOMO-4 → LUMO   | 0.17112  | 6%  |
|        |        | HOMO-4 → LUMO+3 | -0.10095 | 2%  |
|        |        | HOMO-3 → LUMO+1 | -0.18667 | 7%  |
| 233.37 | 0.0762 | HOMO-3 → LUMO+2 | 0.18081  | 7%  |
|        |        | HOMO-2 → LUMO+2 | -0.31909 | 20% |
|        |        | HOMO-1 → LUMO+3 | 0.36239  | 26% |
|        |        | HOMO-1 → LUMO+4 | 0.14651  | 4%  |

## SUPPORTING INFORMATION

**Table S4.** TD-DFT-calculated UV/vis absorption data for (*P*)-H1-Ph<sub>2</sub> at the CAM-B3LYP-D3BJ/def2-TZVP (solvent CH<sub>2</sub>Cl<sub>2</sub>) level.

| Calcd. $\lambda$ [nm]     | $f$      | composition                 | coefficient | contribution |
|---------------------------|----------|-----------------------------|-------------|--------------|
| 378.24                    | 0.2185   | HOMO-2 $\rightarrow$ LUMO   | 0.12191     | 3%           |
|                           |          | HOMO-1 $\rightarrow$ LUMO   | 0.14986     | 4%           |
|                           |          | HOMO $\rightarrow$ LUMO     | 0.64763     | 84%          |
| 341.55                    | 0.0500   | HOMO-2 $\rightarrow$ LUMO   | 0.22850     | 10%          |
|                           |          | HOMO-1 $\rightarrow$ LUMO   | 0.55134     | 61%          |
|                           |          | HOMO-1 $\rightarrow$ LUMO+2 | -0.13593    | 4%           |
|                           |          | HOMO $\rightarrow$ LUMO     | -0.13008    | 3%           |
|                           |          | HOMO $\rightarrow$ LUMO+1   | 0.24304     | 12%          |
| 323.64                    | 0.0406   | HOMO-4 $\rightarrow$ LUMO+1 | 0.14919     | 4%           |
|                           |          | HOMO-3 $\rightarrow$ LUMO   | 0.10953     | 2%           |
|                           |          | HOMO-2 $\rightarrow$ LUMO   | 0.30853     | 19%          |
|                           |          | HOMO-1 $\rightarrow$ LUMO   | -0.30650    | 19%          |
|                           |          | HOMO-1 $\rightarrow$ LUMO+1 | 0.24936     | 12%          |
|                           |          | HOMO $\rightarrow$ LUMO+1   | 0.39451     | 31%          |
| 308.69                    | 0.1758   | HOMO-6 $\rightarrow$ LUMO   | -0.13273    | 4%           |
|                           |          | HOMO-4 $\rightarrow$ LUMO   | -0.25223    | 13%          |
|                           |          | HOMO-2 $\rightarrow$ LUMO   | 0.47142     | 44%          |
|                           |          | HOMO-2 $\rightarrow$ LUMO+1 | 0.20461     | 8%           |
|                           |          | HOMO $\rightarrow$ LUMO     | -0.11919    | 3%           |
|                           |          | HOMO $\rightarrow$ LUMO+1   | -0.28056    | 16%          |
|                           |          | HOMO $\rightarrow$ LUMO+3   | -0.12312    | 3%           |
| 297.74                    | 0.0403   | HOMO-4 $\rightarrow$ LUMO   | 0.24394     | 12%          |
|                           |          | HOMO-3 $\rightarrow$ LUMO   | 0.37396     | 28%          |
|                           |          | HOMO-2 $\rightarrow$ LUMO+1 | -0.15832    | 5%           |
|                           |          | HOMO $\rightarrow$ LUMO+1   | -0.27041    | 15%          |
|                           |          | HOMO $\rightarrow$ LUMO+2   | 0.35377     | 25%          |
| 288.51                    | 0.0089   | HOMO-6 $\rightarrow$ LUMO   | -0.10388    | 2%           |
|                           |          | HOMO-4 $\rightarrow$ LUMO   | -0.15946    | 5%           |
|                           |          | HOMO-4 $\rightarrow$ LUMO+1 | 0.17058     | 6%           |
|                           |          | HOMO-3 $\rightarrow$ LUMO   | 0.41520     | 34%          |
|                           |          | HOMO-3 $\rightarrow$ LUMO+2 | -0.10449    | 2%           |
|                           |          | HOMO-2 $\rightarrow$ LUMO   | -0.14044    | 4%           |
|                           |          | HOMO-1 $\rightarrow$ LUMO+2 | 0.21626     | 9%           |
|                           |          | HOMO $\rightarrow$ LUMO+2   | -0.26572    | 14%          |
|                           |          | HOMO $\rightarrow$ LUMO+3   | -0.11875    | 3%           |
| HOMO $\rightarrow$ LUMO+4 | -0.11859 | 3%                          |             |              |

## SUPPORTING INFORMATION

|        |        |                 |          |     |
|--------|--------|-----------------|----------|-----|
|        |        | HOMO-6 → LUMO   | -0.12543 | 3%  |
|        |        | HOMO-4 → LUMO   | -0.19692 | 8%  |
|        |        | HOMO-3 → LUMO   | 0.13403  | 4%  |
|        |        | HOMO-2 → LUMO   | -0.17372 | 6%  |
| 282.39 | 0.1370 | HOMO-2 → LUMO+1 | 0.37453  | 28% |
|        |        | HOMO-1 → LUMO+1 | 0.14212  | 4%  |
|        |        | HOMO-1 → LUMO+2 | -0.15911 | 5%  |
|        |        | HOMO → LUMO+1   | 0.15211  | 5%  |
|        |        | HOMO → LUMO+2   | 0.30858  | 19% |
|        |        | HOMO-5 → LUMO   | 0.10584  | 2%  |
|        |        | HOMO-4 → LUMO+1 | 0.18610  | 7%  |
|        |        | HOMO-3 → LUMO   | -0.31638 | 20% |
|        |        | HOMO-1 → LUMO   | 0.19603  | 8%  |
| 278.05 | 0.3745 | HOMO-1 → LUMO+1 | 0.31720  | 20% |
|        |        | HOMO-1 → LUMO+2 | 0.22310  | 10% |
|        |        | HOMO → LUMO+2   | 0.21111  | 9%  |
|        |        | HOMO → LUMO+3   | -0.19415 | 8%  |
|        |        | HOMO-6 → LUMO   | 0.11436  | 3%  |
|        |        | HOMO-4 → LUMO   | 0.29242  | 17% |
|        |        | HOMO-2 → LUMO+1 | 0.27763  | 15% |
| 270.88 | 0.2606 | HOMO-1 → LUMO+1 | 0.36986  | 27% |
|        |        | HOMO-1 → LUMO+2 | -0.13361 | 4%  |
|        |        | HOMO → LUMO+1   | -0.19707 | 8%  |
|        |        | HOMO → LUMO+2   | -0.29658 | 18% |
|        |        | HOMO-8 → LUMO   | 0.22835  | 10% |
|        |        | HOMO-5 → LUMO   | 0.49719  | 49% |
| 265.02 | 0.0284 | HOMO-4 → LUMO   | -0.22059 | 10% |
|        |        | HOMO-1 → LUMO+2 | -0.24333 | 12% |
|        |        | HOMO → LUMO+3   | 0.15677  | 5%  |
|        |        | HOMO-6 → LUMO   | 0.15290  | 5%  |
|        |        | HOMO-5 → LUMO   | 0.19447  | 8%  |
|        |        | HOMO-4 → LUMO   | 0.26818  | 14% |
|        |        | HOMO-3 → LUMO+1 | 0.10914  | 2%  |
| 263.95 | 0.0151 | HOMO-2 → LUMO+1 | 0.35515  | 25% |
|        |        | HOMO-1 → LUMO+1 | -0.34371 | 24% |
|        |        | HOMO-1 → LUMO+2 | 0.15045  | 5%  |
|        |        | HOMO → LUMO+1   | 0.11951  | 3%  |

## SUPPORTING INFORMATION

|        |        |  |                 |          |     |
|--------|--------|--|-----------------|----------|-----|
|        |        |  | HOMO → LUMO+3   | -0.16144 | 5%  |
|        |        |  | HOMO-8 → LUMO   | 0.20243  | 8%  |
|        |        |  | HOMO-8 → LUMO+1 | 0.16165  | 5%  |
|        |        |  | HOMO-6 → LUMO+1 | 0.17349  | 6%  |
|        |        |  | HOMO-5 → LUMO   | -0.26822 | 14% |
|        |        |  | HOMO-4 → LUMO+1 | 0.30007  | 18% |
|        |        |  | HOMO-3 → LUMO+1 | 0.19998  | 8%  |
| 260.25 | 0.1279 |  | HOMO-2 → LUMO   | -0.10557 | 2%  |
|        |        |  | HOMO-2 → LUMO+1 | 0.10675  | 2%  |
|        |        |  | HOMO-2 → LUMO+2 | 0.11727  | 3%  |
|        |        |  | HOMO-2 → LUMO+3 | 0.16072  | 5%  |
|        |        |  | HOMO-1 → LUMO+2 | -0.15064 | 5%  |
|        |        |  | HOMO → LUMO+1   | -0.13971 | 4%  |
|        |        |  | HOMO → LUMO+3   | 0.12450  | 3%  |
|        |        |  | HOMO-8 → LUMO   | 0.42411  | 36% |
|        |        |  | HOMO-8 → LUMO+1 | -0.16446 | 5%  |
|        |        |  | HOMO-7 → LUMO   | 0.10880  | 2%  |
| 250.95 | 0.0284 |  | HOMO-6 → LUMO   | 0.19848  | 8%  |
|        |        |  | HOMO-5 → LUMO   | -0.24312 | 12% |
|        |        |  | HOMO-5 → LUMO+1 | -0.13983 | 4%  |
|        |        |  | HOMO-3 → LUMO+1 | -0.22955 | 11% |
|        |        |  | HOMO-8 → LUMO   | -0.20542 | 8%  |
|        |        |  | HOMO-7 → LUMO   | 0.15113  | 5%  |
| 247.70 | 0.0107 |  | HOMO-6 → LUMO   | 0.55462  | 62% |
|        |        |  | HOMO-4 → LUMO   | -0.25780 | 13% |
|        |        |  | HOMO-4 → LUMO+1 | -0.10698 | 2%  |
|        |        |  | HOMO-2 → LUMO+1 | 0.13776  | 4%  |
| 245.64 | 0.7156 |  | HOMO-1 → LUMO+2 | 0.39577  | 31% |
|        |        |  | HOMO → LUMO+3   | 0.49400  | 49% |

**Table S5.** TD-DFT-calculated UV/Vis absorption data for (*M,M*)-H2-Me<sub>4</sub> at the CAM-B3LYP-D3BJ/def2-TZVP (solvent CH<sub>2</sub>Cl<sub>2</sub>) level.

| Calcd. $\lambda$ [nm] | $f$    | composition     | coefficient | contribution |
|-----------------------|--------|-----------------|-------------|--------------|
|                       |        | HOMO-4 → LUMO+1 | -0.10492    | 2%           |
|                       |        | HOMO-2 → LUMO   | 0.11904     | 3%           |
| 354.70                | 0.4400 | HOMO-1 → LUMO+1 | -0.14886    | 4%           |
|                       |        | HOMO → LUMO     | 0.63159     | 80%          |
|                       |        | HOMO → LUMO+2   | 0.11629     | 3%           |
| 338.34                | 0.0719 | HOMO-4 → LUMO   | -0.10849    | 2%           |



## SUPPORTING INFORMATION

|        |        |                 |          |     |
|--------|--------|-----------------|----------|-----|
|        |        | HOMO-3 → LUMO   | 0.10688  | 2%  |
|        |        | HOMO-3 → LUMO+2 | 0.10637  | 2%  |
|        |        | HOMO-2 → LUMO+3 | 0.12545  | 3%  |
|        |        | HOMO-1 → LUMO   | -0.27525 | 15% |
|        |        | HOMO → LUMO+1   | 0.58185  | 68% |
|        |        | HOMO-5 → LUMO   | -0.11396 | 3%  |
|        |        | HOMO-4 → LUMO+3 | -0.14219 | 4%  |
|        |        | HOMO-3 → LUMO+1 | -0.12322 | 3%  |
| 318.33 | 0.0069 | HOMO-3 → LUMO+3 | -0.10648 | 2%  |
|        |        | HOMO-2 → LUMO   | -0.15861 | 5%  |
|        |        | HOMO-2 → LUMO+2 | -0.11207 | 3%  |
|        |        | HOMO-1 → LUMO+1 | 0.30782  | 19% |
|        |        | HOMO → LUMO+2   | 0.50992  | 52% |
|        |        | HOMO-4 → LUMO+2 | -0.13043 | 3%  |
|        |        | HOMO-3 → LUMO   | -0.34706 | 24% |
| 304.91 | 0.0005 | HOMO-2 → LUMO+1 | -0.30179 | 18% |
|        |        | HOMO-1 → LUMO   | -0.13605 | 4%  |
|        |        | HOMO-1 → LUMO+2 | -0.29014 | 17% |
|        |        | HOMO → LUMO+3   | 0.35135  | 25% |
|        |        | HOMO-5 → LUMO   | -0.10915 | 2%  |
|        |        | HOMO-3 → LUMO+1 | 0.38625  | 30% |
| 298.55 | 0.1835 | HOMO-2 → LUMO   | 0.45131  | 41% |
|        |        | HOMO-2 → LUMO+2 | -0.16564 | 5%  |
|        |        | HOMO-1 → LUMO+1 | 0.21358  | 9%  |
|        |        | HOMO-1 → LUMO+3 | 0.11091  | 2%  |
|        |        | HOMO-4 → LUMO+1 | -0.22185 | 10% |
|        |        | HOMO-2 → LUMO   | -0.10649 | 2%  |
|        |        | HOMO-2 → LUMO+2 | 0.12541  | 3%  |
| 291.92 | 0.0614 | HOMO-1 → LUMO+1 | 0.47145  | 44% |
|        |        | HOMO-1 → LUMO+3 | 0.25261  | 13% |
|        |        | HOMO-1 → LUMO+4 | -0.12038 | 3%  |
|        |        | HOMO → LUMO     | 0.13832  | 4%  |
|        |        | HOMO → LUMO+2   | -0.24495 | 12% |
|        |        | HOMO-4 → LUMO   | -0.13836 | 4%  |
|        |        | HOMO-3 → LUMO   | -0.23290 | 11% |
| 288.66 | 0.0548 | HOMO-2 → LUMO+1 | -0.14856 | 4%  |
|        |        | HOMO-1 → LUMO   | 0.49555  | 49% |
|        |        | HOMO-1 → LUMO+2 | 0.19936  | 8%  |

## SUPPORTING INFORMATION

|        |        |                 |          |     |
|--------|--------|-----------------|----------|-----|
|        |        | HOMO → LUMO+1   | 0.28583  | 16% |
|        |        | HOMO-5 → LUMO+1 | -0.19737 | 8%  |
|        |        | HOMO-4 → LUMO   | 0.20932  | 9%  |
|        |        | HOMO-4 → LUMO+2 | -0.10126 | 2%  |
|        |        | HOMO-3 → LUMO+2 | -0.29455 | 17% |
|        |        | HOMO-2 → LUMO+1 | 0.33850  | 23% |
| 285.47 | 0.6487 | HOMO-2 → LUMO+3 | -0.20422 | 8%  |
|        |        | HOMO-1 → LUMO   | 0.10816  | 2%  |
|        |        | HOMO-1 → LUMO+2 | -0.14345 | 4%  |
|        |        | HOMO → LUMO+1   | 0.16356  | 5%  |
|        |        | HOMO → LUMO+3   | 0.21415  | 9%  |
|        |        | HOMO → LUMO+4   | -0.14179 | 4%  |
|        |        | HOMO-5 → LUMO   | 0.13587  | 4%  |
|        |        | HOMO-4 → LUMO+1 | -0.12194 | 3%  |
|        |        | HOMO-3 → LUMO+3 | 0.28130  | 16% |
| 276.08 | 0.2189 | HOMO-2 → LUMO   | 0.18474  | 7%  |
|        |        | HOMO-2 → LUMO+2 | 0.43816  | 38% |
|        |        | HOMO → LUMO     | -0.16640 | 6%  |
|        |        | HOMO → LUMO+2   | 0.28055  | 16% |
|        |        | HOMO-4 → LUMO   | -0.15711 | 5%  |
|        |        | HOMO-3 → LUMO   | 0.30337  | 18% |
|        |        | HOMO-3 → LUMO+2 | 0.25848  | 13% |
| 268.71 | 0.3010 | HOMO-2 → LUMO+3 | 0.20330  | 8%  |
|        |        | HOMO-1 → LUMO   | 0.32973  | 22% |
|        |        | HOMO-1 → LUMO+2 | -0.20024 | 8%  |
|        |        | HOMO → LUMO+3   | 0.30205  | 18% |
|        |        | HOMO-5 → LUMO+1 | 0.10735  | 2%  |
|        |        | HOMO-5 → LUMO+3 | -0.10693 | 2%  |
| 254.92 | 0.0856 | HOMO-3 → LUMO+2 | -0.14004 | 4%  |
|        |        | HOMO-1 → LUMO+2 | 0.45246  | 41% |
|        |        | HOMO → LUMO+3   | 0.43553  | 38% |
|        |        | HOMO-6 → LUMO+1 | 0.13105  | 3%  |
|        |        | HOMO-5 → LUMO   | -0.11518 | 3%  |
|        |        | HOMO-5 → LUMO+2 | 0.15725  | 5%  |
| 254.35 | 0.0389 | HOMO-4 → LUMO+1 | 0.27618  | 15% |
|        |        | HOMO-3 → LUMO+1 | -0.27011 | 15% |
|        |        | HOMO-2 → LUMO   | 0.26150  | 14% |
|        |        | HOMO-2 → LUMO+2 | 0.14951  | 4%  |

## SUPPORTING INFORMATION

|        |        |                 |          |     |
|--------|--------|-----------------|----------|-----|
|        |        | HOMO-1 → LUMO+1 | 0.18718  | 7%  |
|        |        | HOMO-1 → LUMO+3 | -0.27191 | 15% |
|        |        | HOMO → LUMO+2   | -0.18411 | 7%  |
|        |        | HOMO-4 → LUMO   | 0.47694  | 45% |
|        |        | HOMO-4 → LUMO+2 | 0.23734  | 11% |
| 251.37 | 0.3656 | HOMO-3 → LUMO   | -0.18793 | 7%  |
|        |        | HOMO-3 → LUMO+2 | 0.15566  | 5%  |
|        |        | HOMO-2 → LUMO+3 | 0.21725  | 9%  |
|        |        | HOMO-1 → LUMO   | 0.10341  | 2%  |
|        |        | HOMO-8 → LUMO   | 0.16001  | 5%  |
|        |        | HOMO-7 → LUMO   | -0.14563 | 4%  |
|        |        | HOMO-6 → LUMO+1 | 0.40108  | 32% |
|        |        | HOMO-6 → LUMO+3 | 0.13517  | 4%  |
| 248.06 | 0.0384 | HOMO-6 → LUMO+4 | -0.14659 | 4%  |
|        |        | HOMO-3 → LUMO+1 | -0.16547 | 5%  |
|        |        | HOMO-1 → LUMO+1 | -0.10817 | 2%  |
|        |        | HOMO-1 → LUMO+3 | 0.35281  | 25% |
|        |        | HOMO → LUMO+2   | 0.10982  | 2%  |
|        |        | HOMO-8 → LUMO+1 | 0.14189  | 4%  |
|        |        | HOMO-6 → LUMO   | 0.21751  | 9%  |
|        |        | HOMO-5 → LUMO+1 | 0.28434  | 16% |
|        |        | HOMO-4 → LUMO   | -0.21654 | 9%  |
|        |        | HOMO-4 → LUMO+2 | 0.14528  | 4%  |
| 244.90 | 0.0806 | HOMO-3 → LUMO   | -0.14941 | 4%  |
|        |        | HOMO-3 → LUMO+2 | -0.23580 | 11% |
|        |        | HOMO-2 → LUMO+1 | 0.16588  | 6%  |
|        |        | HOMO-1 → LUMO+2 | -0.24686 | 12% |
|        |        | HOMO-1 → LUMO+5 | 0.10329  | 2%  |
|        |        | HOMO → LUMO+4   | 0.17126  | 6%  |

**Table S6.** TD-DFT-calculated UV/Vis absorption data for (*M,M*)-H2-Ph<sub>4</sub> at the CAM-B3LYP-D3BJ/def2-TZVP (solvent CH<sub>2</sub>Cl<sub>2</sub>) level.

| Calcd. $\lambda$ [nm] | $f$    | composition     | coefficient | contribution |
|-----------------------|--------|-----------------|-------------|--------------|
|                       |        | HOMO-7 → LUMO+1 | 0.11837     | 3%           |
|                       |        | HOMO-4 → LUMO   | -0.14432    | 4%           |
| 350.19                | 0.4536 | HOMO-2 → LUMO+1 | 0.12904     | 3%           |
|                       |        | HOMO-1 → LUMO+1 | -0.10345    | 2%           |
|                       |        | HOMO → LUMO     | 0.61622     | 76%          |
|                       |        | HOMO → LUMO+2   | -0.10918    | 2%           |

## SUPPORTING INFORMATION

|        |        |                   |          |     |
|--------|--------|-------------------|----------|-----|
|        |        | HOMO-7 -> LUMO    | 0.13830  | 4%  |
|        |        | HOMO-5 -> LUMO+2  | -0.11056 | 2%  |
| 337.97 | 0.1048 | HOMO-4 -> LUMO+3  | -0.11067 | 2%  |
|        |        | HOMO-2 -> LUMO    | 0.18870  | 7%  |
|        |        | HOMO-1 -> LUMO    | -0.18584 | 7%  |
|        |        | HOMO -> LUMO+1    | 0.58547  | 69% |
|        |        | HOMO-13 -> LUMO   | -0.11400 | 3%  |
|        |        | HOMO-5 -> LUMO+3  | 0.13356  | 4%  |
| 314.74 | 0.0015 | HOMO-4 -> LUMO    | -0.16550 | 5%  |
|        |        | HOMO-2 -> LUMO+1  | 0.23663  | 11% |
|        |        | HOMO-1 -> LUMO+1  | -0.33492 | 22% |
|        |        | HOMO -> LUMO+2    | 0.43121  | 37% |
|        |        | HOMO-7 -> LUMO+2  | 0.12179  | 3%  |
|        |        | HOMO-5 -> LUMO    | 0.36127  | 26% |
|        |        | HOMO-4 -> LUMO+1  | -0.33951 | 23% |
| 302.95 | 0.0144 | HOMO-2 -> LUMO    | 0.18005  | 6%  |
|        |        | HOMO-2 -> LUMO+2  | 0.13856  | 4%  |
|        |        | HOMO-1 -> LUMO+2  | -0.15656 | 5%  |
|        |        | HOMO -> LUMO+1    | -0.13798 | 4%  |
|        |        | HOMO -> LUMO+3    | -0.29556 | 17% |
|        |        | HOMO-6 -> LUMO    | -0.10317 | 2%  |
|        |        | HOMO-5 -> LUMO+1  | -0.38060 | 29% |
|        |        | HOMO-4 -> LUMO    | 0.42517  | 36% |
| 299.27 | 0.1892 | HOMO-4 -> LUMO+2  | 0.10646  | 2%  |
|        |        | HOMO-2 -> LUMO+1  | -0.10136 | 2%  |
|        |        | HOMO-1 -> LUMO+1  | -0.25964 | 13% |
|        |        | HOMO-1 -> LUMO+3  | -0.11663 | 3%  |
|        |        | HOMO-12 -> LUMO+1 | 0.19792  | 8%  |
|        |        | HOMO-5 -> LUMO+1  | -0.11608 | 3%  |
|        |        | HOMO-5 -> LUMO+3  | 0.16200  | 5%  |
|        |        | HOMO-4 -> LUMO    | 0.16340  | 5%  |
| 294.95 | 0.0872 | HOMO-4 -> LUMO+2  | 0.14631  | 4%  |
|        |        | HOMO-1 -> LUMO+1  | 0.38538  | 30% |
|        |        | HOMO-1 -> LUMO+3  | 0.16692  | 6%  |
|        |        | HOMO-1 -> 204     | -0.10390 | 2%  |
|        |        | HOMO -> LUMO      | 0.13658  | 4%  |
|        |        | HOMO -> LUMO+2    | 0.34133  | 23% |

## SUPPORTING INFORMATION

|        |        |                   |          |     |
|--------|--------|-------------------|----------|-----|
|        |        | HOMO-6 -> LUMO+1  | 0.10860  | 2%  |
|        |        | HOMO-5 -> LUMO+2  | 0.10135  | 2%  |
|        |        | HOMO-4 -> LUMO+3  | 0.11528  | 3%  |
|        |        | HOMO-3 -> LUMO+1  | 0.18773  | 7%  |
| 290.77 | 0.0282 | HOMO-2 -> LUMO    | -0.11488 | 3%  |
|        |        | HOMO-2 -> LUMO+2  | 0.12073  | 3%  |
|        |        | HOMO-1 -> LUMO    | 0.50650  | 51% |
|        |        | HOMO-1 -> LUMO+2  | -0.11891 | 3%  |
|        |        | HOMO -> LUMO+1    | 0.27015  | 15% |
|        |        | HOMO-13 -> LUMO+1 | -0.14959 | 4%  |
|        |        | HOMO-12 -> LUMO   | 0.22391  | 10% |
|        |        | HOMO-6 -> LUMO+1  | -0.11535 | 3%  |
|        |        | HOMO-5 -> LUMO    | -0.16266 | 5%  |
|        |        | HOMO-5 -> LUMO+2  | -0.26031 | 14% |
| 284.75 | 0.7605 | HOMO-4 -> LUMO+1  | 0.29106  | 17% |
|        |        | HOMO-4 -> LUMO+3  | -0.14190 | 4%  |
|        |        | HOMO-1 -> LUMO    | 0.15956  | 5%  |
|        |        | HOMO-1 -> LUMO+2  | -0.18457 | 7%  |
|        |        | HOMO -> LUMO+3    | -0.28530 | 16% |
|        |        | HOMO -> LUMO+4    | 0.10870  | 2%  |
|        |        | HOMO-12 -> LUMO+1 | -0.10327 | 2%  |
|        |        | HOMO-8 -> LUMO+1  | 0.11535  | 3%  |
|        |        | HOMO-5 -> LUMO+1  | -0.15729 | 5%  |
| 279.22 | 0.0284 | HOMO-3 -> LUMO    | 0.33189  | 22% |
|        |        | HOMO-2 -> LUMO+1  | 0.47334  | 45% |
|        |        | HOMO-2 -> LUMO+3  | 0.12034  | 3%  |
|        |        | HOMO-1 -> LUMO+1  | 0.12889  | 3%  |
|        |        | HOMO-5 -> LUMO+2  | -0.10050 | 2%  |
|        |        | HOMO-4 -> LUMO+3  | -0.11038 | 2%  |
|        |        | HOMO-3 -> LUMO+1  | 0.39044  | 30% |
| 277.80 | 0.0012 | HOMO-2 -> LUMO    | 0.43346  | 38% |
|        |        | HOMO-2 -> LUMO+2  | -0.14177 | 4%  |
|        |        | HOMO-1 -> LUMO    | 0.14019  | 4%  |
|        |        | HOMO -> LUMO+1    | -0.10787 | 2%  |
|        |        | HOMO-13 -> LUMO   | -0.14317 | 4%  |
| 272.13 | 0.1884 | HOMO-12 -> LUMO+1 | 0.14619  | 4%  |
|        |        | HOMO-5 -> LUMO+3  | 0.22572  | 10% |
|        |        | HOMO-4 -> LUMO    | -0.13347 | 4%  |

## SUPPORTING INFORMATION

|        |        |                   |          |     |
|--------|--------|-------------------|----------|-----|
|        |        | HOMO-4 -> LUMO+2  | 0.40978  | 34% |
|        |        | HOMO-2 -> LUMO+3  | 0.15317  | 5%  |
|        |        | HOMO -> LUMO      | -0.19173 | 7%  |
|        |        | HOMO -> LUMO+2    | -0.28962 | 17% |
|        |        | HOMO-12 -> LUMO   | 0.13668  | 4%  |
|        |        | HOMO-7 -> LUMO    | 0.13879  | 4%  |
|        |        | HOMO-5 -> LUMO    | 0.27940  | 16% |
|        |        | HOMO-5 -> LUMO+2  | -0.16134 | 5%  |
|        |        | HOMO-4 -> LUMO+3  | -0.20822 | 9%  |
| 263.73 | 0.2250 | HOMO-3 -> LUMO+1  | -0.21351 | 9%  |
|        |        | HOMO-2 -> LUMO    | -0.10890 | 2%  |
|        |        | HOMO-2 -> LUMO+2  | -0.23173 | 11% |
|        |        | HOMO-1 -> LUMO    | 0.23131  | 11% |
|        |        | HOMO-1 -> LUMO+2  | 0.11612  | 3%  |
|        |        | HOMO -> LUMO+3    | 0.26433  | 14% |
|        |        | HOMO-12 -> LUMO+1 | -0.25911 | 13% |
|        |        | HOMO-8 -> LUMO+1  | 0.19505  | 8%  |
|        |        | HOMO-6 -> LUMO    | 0.35175  | 25% |
|        |        | HOMO-4 -> LUMO    | -0.13260 | 4%  |
| 254.98 | 0.0158 | HOMO-4 -> LUMO+2  | 0.20976  | 9%  |
|        |        | HOMO-3 -> LUMO    | 0.14570  | 4%  |
|        |        | HOMO-2 -> LUMO+1  | -0.22185 | 10% |
|        |        | HOMO-2 -> LUMO+3  | 0.12080  | 3%  |
|        |        | HOMO-1 -> LUMO+3  | -0.18548 | 7%  |
|        |        | HOMO -> LUMO+2    | 0.11049  | 2%  |
|        |        | HOMO-12 -> LUMO   | -0.19542 | 8%  |
|        |        | HOMO-8 -> LUMO    | 0.10262  | 2%  |
|        |        | HOMO-6 -> LUMO+1  | 0.26372  | 14% |
|        |        | HOMO-5 -> LUMO+2  | -0.17675 | 6%  |
| 254.30 | 0.3305 | HOMO-4 -> LUMO+3  | -0.11236 | 3%  |
|        |        | HOMO-3 -> LUMO+1  | 0.16690  | 6%  |
|        |        | HOMO-2 -> LUMO    | -0.22903 | 10% |
|        |        | HOMO-1 -> LUMO+2  | 0.31542  | 20% |
|        |        | HOMO -> LUMO+3    | -0.28796 | 17% |
|        |        | HOMO-12 -> LUMO   | -0.11893 | 3%  |
| 252.26 | 0.0194 | HOMO-8 -> LUMO    | 0.22912  | 10% |
|        |        | HOMO-7 -> LUMO    | 0.26712  | 14% |
|        |        | HOMO-6 -> LUMO+1  | 0.35656  | 25% |

## SUPPORTING INFORMATION

|                  |          |     |
|------------------|----------|-----|
| HOMO-4 -> LUMO+1 | 0.13279  | 4%  |
| HOMO-2 -> LUMO+2 | 0.14781  | 4%  |
| HOMO-1 -> LUMO+2 | -0.24975 | 12% |
| HOMO -> LUMO+3   | 0.18383  | 7%  |

Cartesian coordinates (B3LYP-D3BJ/def2-SVP, CH<sub>2</sub>Cl<sub>2</sub>, PCM model): *P-M*-Isomerization Process of H1-Me<sub>2</sub>**(P)-H1-Me<sub>2</sub>**Total energy of the optimized structure  $E = -1197.32682538$  Hartree

| Symbol | X         | Y         | Z         |
|--------|-----------|-----------|-----------|
| C      | 1.241119  | -0.827774 | 0.018216  |
| C      | 1.310640  | 0.648408  | -0.047800 |
| N      | 2.599452  | 1.021997  | -0.259202 |
| B      | 3.641270  | -0.180058 | 0.014048  |
| C      | 2.542461  | -1.321733 | 0.247795  |
| C      | 2.720920  | -2.674585 | 0.594637  |
| C      | 1.621412  | -3.500708 | 0.731009  |
| C      | 0.325029  | -3.056323 | 0.359667  |
| C      | 0.133298  | -1.727291 | -0.130871 |
| C      | 0.323085  | 1.672396  | 0.127893  |
| C      | 0.659489  | 2.973866  | -0.358225 |
| C      | 1.997131  | 3.260407  | -0.723856 |
| C      | 2.950101  | 2.282423  | -0.577653 |
| C      | -0.797151 | -3.945464 | 0.467294  |
| C      | -2.041196 | -3.570274 | 0.054410  |
| C      | -2.235229 | -2.319012 | -0.617904 |
| C      | -1.132530 | -1.422027 | -0.776840 |
| C      | -0.968286 | 1.490967  | 0.771569  |
| C      | -1.959448 | 2.511055  | 0.626366  |
| C      | -1.626334 | 3.737533  | -0.037661 |
| C      | -0.354210 | 3.983554  | -0.459473 |
| C      | -1.276504 | 0.388014  | 1.601544  |
| C      | -2.530904 | 0.242767  | 2.169337  |
| C      | -3.536502 | 1.201761  | 1.938643  |
| C      | -3.243698 | 2.328941  | 1.192158  |
| C      | -3.492424 | -1.987310 | -1.181072 |
| C      | -3.655087 | -0.840626 | -1.936543 |
| C      | -2.543555 | -0.009300 | -2.186311 |
| C      | -1.313997 | -0.301331 | -1.623867 |

## SUPPORTING INFORMATION

|   |           |           |           |
|---|-----------|-----------|-----------|
| C | 4.516010  | 0.218847  | 1.330482  |
| C | 4.551589  | -0.456211 | -1.307369 |
| H | 3.725511  | -3.057574 | 0.795097  |
| H | 1.734242  | -4.528614 | 1.086428  |
| H | 2.272547  | 4.258616  | -1.065454 |
| H | 4.014498  | 2.460390  | -0.735750 |
| H | -0.630114 | -4.933773 | 0.902876  |
| H | -2.896089 | -4.240651 | 0.170899  |
| H | -2.403000 | 4.498540  | -0.145101 |
| H | -0.082110 | 4.949448  | -0.889885 |
| H | -0.512669 | -0.355792 | 1.812472  |
| H | -2.737570 | -0.624125 | 2.800502  |
| H | -4.530143 | 1.069914  | 2.372372  |
| H | -3.995005 | 3.108796  | 1.046740  |
| H | -4.331200 | -2.670407 | -1.024620 |
| H | -4.629268 | -0.597244 | -2.366857 |
| H | -2.649358 | 0.866682  | -2.830104 |
| H | -0.464600 | 0.337172  | -1.855588 |
| H | 5.175839  | 1.085795  | 1.146264  |
| H | 3.889443  | 0.456214  | 2.208010  |
| H | 5.168486  | -0.626261 | 1.612728  |
| H | 5.196552  | -1.338104 | -1.148721 |
| H | 3.947457  | -0.651733 | -2.210590 |
| H | 5.222664  | 0.393194  | -1.530989 |

**TS**

Total energy of the optimized structure  $E = -1197.26896773$  Hartree

| Symbol | X         | Y        | Z         |
|--------|-----------|----------|-----------|
| H      | -3.371296 | 1.190056 | 2.760546  |
| H      | -5.020142 | 2.094776 | 1.110753  |
| C      | -3.038608 | 1.492607 | 1.765734  |
| C      | -3.963078 | 2.020248 | 0.844946  |
| C      | -1.705990 | 1.354786 | 1.413530  |
| C      | -3.513311 | 2.511977 | -0.369842 |
| H      | -4.204500 | 3.009990 | -1.054715 |
| C      | -1.230283 | 1.764699 | 0.150001  |
| C      | -2.138783 | 2.469420 | -0.704055 |
| C      | 0.186561  | 1.728905 | -0.172601 |



SUPPORTING INFORMATION

---

|   |           |           |           |
|---|-----------|-----------|-----------|
| C | -1.614901 | 3.271633  | -1.772722 |
| H | -2.309394 | 3.780120  | -2.445616 |
| C | -0.275309 | 3.518554  | -1.824591 |
| H | 0.130456  | 4.253834  | -2.524190 |
| C | 0.652289  | 2.818469  | -0.975459 |
| C | 1.196725  | 0.811992  | 0.303834  |
| C | 2.010001  | 3.217101  | -0.915365 |
| C | 2.528372  | 1.278295  | 0.406494  |
| C | 2.900610  | 2.531507  | -0.110572 |
| C | 3.670395  | 0.020435  | 2.505713  |
| H | 4.233598  | 0.886692  | 2.894221  |
| H | 2.693860  | 0.004352  | 3.020153  |
| H | 4.224325  | -0.887645 | 2.804968  |
| C | 4.958279  | 0.081730  | 0.117709  |
| H | 5.595844  | -0.764141 | 0.432674  |
| H | 5.525750  | 0.997731  | 0.360301  |
| H | 4.867952  | 0.040737  | -0.982339 |
| C | 1.253359  | -0.690823 | 0.279476  |
| C | 3.039946  | -2.220686 | -0.130689 |
| C | 0.326323  | -1.693830 | -0.181645 |
| H | 2.685127  | -3.831656 | -1.506710 |
| C | 2.257280  | -2.998908 | -0.947625 |
| C | 0.873969  | -2.718815 | -1.014518 |
| H | 0.460137  | -4.149718 | -2.601419 |
| C | 0.004212  | -3.463594 | -1.884539 |
| H | -2.005270 | -3.851528 | -2.504829 |
| C | -1.348322 | -3.311561 | -1.818849 |
| C | -1.934001 | -2.574201 | -0.734540 |
| C | -1.084635 | -1.824236 | 0.138690  |
| H | -3.947057 | -3.273941 | -1.104929 |
| C | -3.299640 | -2.736602 | -0.407741 |
| C | -1.590526 | -1.473746 | 1.406250  |
| H | -0.907100 | -1.061242 | 2.145452  |
| C | -3.787735 | -2.308220 | 0.816806  |
| C | -2.910527 | -1.724791 | 1.747874  |
| H | -4.835276 | -2.471983 | 1.078972  |
| H | -3.268747 | -1.465694 | 2.745777  |
| H | 4.096461  | -2.419942 | 0.043341  |

## SUPPORTING INFORMATION

|   |           |           |           |
|---|-----------|-----------|-----------|
| H | -0.985586 | 0.986267  | 2.141125  |
| H | 3.932871  | 2.875485  | -0.009361 |
| H | 2.330435  | 4.081516  | -1.503356 |
| B | 3.527653  | 0.115152  | 0.880156  |
| N | 2.557608  | -1.073414 | 0.386883  |

Cartesian coordinates (B3LYP-D3BJ/def2-SVP, CH<sub>2</sub>Cl<sub>2</sub>, PCM model): *P-M*-Isomerization Process of H<sub>2</sub>-Me<sub>4</sub>

**(*M,M*)-H<sub>2</sub>-Me<sub>4</sub>**

Total energy of the optimized structure  $E = -1548.34936954$  Hartree

| Symbol | X         | Y         | Z         |
|--------|-----------|-----------|-----------|
| C      | 1.196680  | 1.332512  | 0.133213  |
| C      | 1.217167  | 2.754523  | 0.082002  |
| C      | -0.000002 | 3.439534  | 0.000000  |
| C      | -1.217170 | 2.754522  | -0.082002 |
| C      | -1.196683 | 1.332510  | -0.133216 |
| C      | -0.000001 | 0.621708  | -0.000003 |
| C      | 2.571859  | 0.802979  | 0.168407  |
| C      | -2.571861 | 0.802976  | -0.168410 |
| C      | 3.069307  | -0.540293 | 0.215415  |
| C      | 4.405150  | -0.741188 | -0.250059 |
| C      | 5.249763  | 0.378032  | -0.452044 |
| C      | 4.750332  | 1.640583  | -0.249558 |
| N      | 3.440832  | 1.830981  | 0.006837  |
| C      | 2.321849  | -1.704638 | 0.671595  |
| C      | 2.796694  | -3.007860 | 0.322238  |
| C      | 4.073402  | -3.149335 | -0.316456 |
| C      | 4.876095  | -2.067911 | -0.524993 |
| N      | -3.440835 | 1.830977  | -0.006839 |
| C      | -4.750334 | 1.640577  | 0.249557  |
| C      | -5.249764 | 0.378026  | 0.452043  |
| C      | -4.405150 | -0.741193 | 0.250059  |
| C      | -3.069307 | -0.540297 | -0.215416 |
| C      | 0.898800  | -4.030909 | 1.452290  |
| C      | 0.499727  | -2.759870 | 1.909145  |
| B      | 2.726857  | 3.290291  | 0.065122  |
| B      | -2.726861 | 3.290288  | -0.065121 |
| C      | 3.102119  | 4.135262  | -1.273881 |
| C      | -3.195167 | 4.021762  | -1.444764 |

SUPPORTING INFORMATION

---

|   |           |           |           |
|---|-----------|-----------|-----------|
| C | 1.203787  | -1.627274 | 1.536254  |
| C | 2.047554  | -4.150728 | 0.692286  |
| C | -4.876092 | -2.067916 | 0.524993  |
| C | -4.073398 | -3.149340 | 0.316457  |
| C | -2.796691 | -3.007863 | -0.322238 |
| C | -2.321847 | -1.704640 | -0.671595 |
| C | -2.047549 | -4.150729 | -0.692287 |
| C | -0.898794 | -4.030908 | -1.452290 |
| C | -0.499722 | -2.759869 | -1.909143 |
| C | -1.203784 | -1.627274 | -1.536253 |
| H | -0.323480 | -4.917058 | -1.726929 |
| H | 0.365128  | -2.663622 | -2.568766 |
| H | -0.903338 | -0.661384 | -1.936294 |
| H | -2.409734 | -5.134927 | -0.385796 |
| H | -4.419288 | -4.153876 | 0.571690  |
| H | -5.883313 | -2.186274 | 0.929581  |
| H | -6.287172 | 0.234862  | 0.756182  |
| H | -0.365122 | -2.663625 | 2.568769  |
| H | 0.903341  | -0.661385 | 1.936297  |
| H | 0.323487  | -4.917060 | 1.726930  |
| H | 2.409740  | -5.134925 | 0.385795  |
| H | 4.419294  | -4.153871 | -0.571689 |
| H | 5.883316  | -2.186268 | -0.929580 |
| H | 6.287172  | 0.234869  | -0.756183 |
| H | 5.358398  | 2.540914  | -0.343137 |
| H | 0.000001  | -0.459070 | -0.000007 |
| H | -0.000003 | 4.535408  | 0.000001  |
| H | -5.358402 | 2.540908  | 0.343135  |
| H | -2.979673 | 3.419325  | -2.344729 |
| H | -4.276652 | 4.250478  | -1.446630 |
| H | -2.662525 | 4.982281  | -1.558845 |
| H | 4.170176  | 4.417308  | -1.313220 |
| H | 2.865775  | 3.591635  | -2.205721 |
| H | 2.524819  | 5.076409  | -1.292692 |
| C | -3.102124 | 4.135256  | 1.273884  |
| H | -2.865781 | 3.591627  | 2.205723  |
| H | -2.524823 | 5.076403  | 1.292697  |
| H | -4.170180 | 4.417303  | 1.313223  |

## SUPPORTING INFORMATION

|   |          |          |          |
|---|----------|----------|----------|
| C | 3.195161 | 4.021762 | 1.444767 |
| H | 4.276646 | 4.250481 | 1.446633 |
| H | 2.662517 | 4.982279 | 1.558851 |
| H | 2.979670 | 3.419322 | 2.344731 |

**TS3**

Total energy of the optimized structure  $E = -1548.32645708$  Hartree

| Symbol | X        | Y         | Z         |
|--------|----------|-----------|-----------|
| C      | 2.466497 | -0.916596 | 0.092384  |
| C      | 3.268889 | 0.293840  | -0.119909 |
| C      | 4.699796 | 0.129892  | -0.023962 |
| C      | 5.285149 | -1.104720 | 0.324367  |
| C      | 4.476300 | -2.189469 | 0.474625  |
| N      | 3.147499 | -2.078446 | 0.322239  |
| C      | 2.828862 | 1.656481  | -0.479923 |
| C      | 3.794809 | 2.663153  | -0.835725 |
| C      | 5.194061 | 2.398247  | -0.745257 |
| C      | 5.622917 | 1.187522  | -0.315485 |
| C      | 2.049299 | 4.315853  | -1.272090 |
| C      | 1.095378 | 3.368706  | -0.869367 |
| B      | 2.276192 | -3.422921 | 0.321712  |
| C      | 2.752112 | -4.352422 | -0.931921 |
| C      | 1.491277 | 2.096518  | -0.490679 |
| C      | 3.383100 | 3.956192  | -1.239973 |
| H      | 0.732717 | 1.425731  | -0.157456 |
| H      | 1.747754 | 5.318789  | -1.581280 |
| H      | 4.157347 | 4.676708  | -1.513662 |
| H      | 5.900852 | 3.189260  | -1.005046 |
| H      | 6.687811 | 0.971694  | -0.213824 |
| H      | 6.366734 | -1.191992 | 0.425134  |
| H      | 4.851190 | -3.188690 | 0.694079  |
| H      | 3.770012 | -4.761420 | -0.798425 |
| H      | 2.731637 | -3.813661 | -1.895627 |
| H      | 2.070838 | -5.216125 | -1.027235 |
| C      | 2.410025 | -4.172642 | 1.764130  |
| H      | 3.424454 | -4.573467 | 1.943421  |
| H      | 1.718453 | -5.032440 | 1.799801  |
| H      | 2.155452 | -3.515235 | 2.614123  |

SUPPORTING INFORMATION

---

|   |           |           |           |
|---|-----------|-----------|-----------|
| C | 0.876007  | -2.724449 | 0.118188  |
| C | -0.366568 | -3.355518 | 0.025508  |
| C | -1.552326 | -2.627407 | -0.055503 |
| C | -1.442840 | -1.219266 | 0.044467  |
| B | -3.071919 | -3.060290 | -0.318791 |
| C | -2.776181 | -0.599389 | -0.052058 |
| N | -3.676459 | -1.551046 | -0.399917 |
| C | -3.287811 | -3.816833 | -1.742497 |
| C | -3.791148 | -3.815328 | 0.933550  |
| C | -3.201846 | 0.763093  | 0.061250  |
| C | -4.923757 | -1.250262 | -0.813420 |
| H | -2.872964 | -3.253430 | -2.596803 |
| H | -4.353247 | -4.016038 | -1.958903 |
| H | -2.779475 | -4.796890 | -1.723243 |
| H | -4.872055 | -3.968513 | 0.760489  |
| H | -3.343025 | -4.814552 | 1.075258  |
| H | -3.679575 | -3.268648 | 1.886405  |
| C | -4.448292 | 1.094695  | -0.552073 |
| C | -2.475463 | 1.819581  | 0.753203  |
| C | -5.314755 | 0.056189  | -0.974690 |
| H | -5.567286 | -2.096292 | -1.057076 |
| C | -4.810863 | 2.470467  | -0.735754 |
| C | -2.844973 | 3.180012  | 0.512138  |
| C | -1.498687 | 1.572393  | 1.748858  |
| H | -6.289880 | 0.294151  | -1.400817 |
| C | -4.002994 | 3.470574  | -0.283615 |
| H | -5.741200 | 2.695374  | -1.261270 |
| C | -2.124055 | 4.225559  | 1.139850  |
| C | -0.829064 | 2.610043  | 2.375660  |
| H | -1.285945 | 0.548058  | 2.047926  |
| H | -4.264216 | 4.516804  | -0.459257 |
| C | -1.115294 | 3.949264  | 2.044585  |
| H | -2.402802 | 5.258532  | 0.918575  |
| H | -0.567790 | 4.762142  | 2.525988  |
| C | 0.997967  | -1.297992 | 0.066795  |
| C | -0.203496 | -0.567346 | 0.066701  |
| H | -0.397311 | -4.450719 | 0.010052  |
| H | -0.264179 | 0.502184  | 0.099837  |

## SUPPORTING INFORMATION

|   |           |          |           |
|---|-----------|----------|-----------|
| H | -0.080074 | 2.384115 | 3.137527  |
| H | 0.034943  | 3.625273 | -0.833697 |

**LM2****((P,M)-H2-Me4)**Total energy of the optimized structure  $E = -1548.34146345$  Hartree

| Symbol | X         | Y         | Z         |
|--------|-----------|-----------|-----------|
| C      | 2.692939  | -0.460401 | 0.176247  |
| C      | 3.160581  | 0.832111  | -0.249320 |
| C      | 4.514016  | 0.903230  | -0.712133 |
| C      | 5.403301  | -0.167064 | -0.461244 |
| C      | 4.924294  | -1.297673 | 0.146056  |
| N      | 3.608023  | -1.442377 | 0.389900  |
| C      | 2.378206  | 2.061654  | -0.291987 |
| C      | 2.843392  | 3.151859  | -1.096831 |
| C      | 4.140498  | 3.090132  | -1.703039 |
| C      | 4.972194  | 2.042720  | -1.452399 |
| C      | 0.900671  | 4.481552  | -0.484852 |
| C      | 0.507320  | 3.467486  | 0.407861  |
| B      | 2.968690  | -2.857638 | 0.828400  |
| C      | 3.524438  | -4.044553 | -0.135390 |
| C      | 1.232917  | 2.290457  | 0.505431  |
| C      | 2.067911  | 4.330199  | -1.209716 |
| H      | -0.370013 | 3.609472  | 1.035890  |
| H      | 0.934079  | 1.546558  | 1.240191  |
| H      | 0.309551  | 5.395944  | -0.569573 |
| H      | 2.430317  | 5.133397  | -1.855718 |
| H      | 4.473450  | 3.934191  | -2.311513 |
| H      | 5.994695  | 2.031744  | -1.834941 |
| H      | 6.450950  | -0.093131 | -0.754306 |
| H      | 5.554904  | -2.152078 | 0.392143  |
| H      | 4.593568  | -4.270078 | 0.030078  |
| H      | 3.391509  | -3.823636 | -1.209298 |
| H      | 2.971118  | -4.977187 | 0.073507  |
| C      | 3.304996  | -3.100000 | 2.407553  |
| H      | 4.389702  | -3.224023 | 2.581010  |
| H      | 2.813340  | -4.022792 | 2.761804  |
| H      | 2.955758  | -2.274115 | 3.051893  |
| C      | 1.450174  | -2.451459 | 0.559871  |

SUPPORTING INFORMATION

---

|   |           |           |           |
|---|-----------|-----------|-----------|
| C | 0.331066  | -3.280819 | 0.449728  |
| C | -0.918928 | -2.763556 | 0.102908  |
| C | -1.041323 | -1.353285 | -0.001597 |
| B | -2.276803 | -3.477051 | -0.379623 |
| C | -2.426399 | -1.002066 | -0.330697 |
| N | -3.076453 | -2.106219 | -0.766851 |
| C | -2.069678 | -4.397395 | -1.703367 |
| C | -3.132149 | -4.209150 | 0.798091  |
| C | -3.120705 | 0.243008  | -0.267251 |
| C | -4.264704 | -2.031691 | -1.399238 |
| H | -1.555724 | -3.863196 | -2.521795 |
| H | -3.026710 | -4.780014 | -2.103260 |
| H | -1.453933 | -5.280031 | -1.455753 |
| H | -4.114599 | -4.566585 | 0.439585  |
| H | -2.580417 | -5.093820 | 1.162069  |
| H | -3.312184 | -3.554722 | 1.669005  |
| C | -4.299217 | 0.353725  | -1.064280 |
| C | -2.785792 | 1.333625  | 0.638249  |
| C | -4.851668 | -0.813459 | -1.650471 |
| H | -4.700052 | -2.978683 | -1.720777 |
| C | -4.933547 | 1.631645  | -1.215020 |
| C | -3.481656 | 2.574589  | 0.499826  |
| C | -1.942604 | 1.170038  | 1.766188  |
| H | -5.768795 | -0.751414 | -2.237206 |
| C | -4.503749 | 2.709554  | -0.499478 |
| H | -5.780701 | 1.715031  | -1.898972 |
| C | -3.241514 | 3.622625  | 1.422715  |
| C | -1.767885 | 2.189302  | 2.686565  |
| H | -1.456072 | 0.212809  | 1.940194  |
| H | -4.991564 | 3.680264  | -0.615875 |
| C | -2.402535 | 3.435613  | 2.506058  |
| H | -3.769146 | 4.569767  | 1.287905  |
| H | -2.243994 | 4.240772  | 3.226495  |
| C | 1.333580  | -1.053911 | 0.283023  |
| C | 0.070974  | -0.499209 | 0.019176  |
| H | 0.457346  | -4.362441 | 0.569810  |
| H | -0.062521 | 0.551698  | -0.219082 |
| H | -1.130763 | 2.023320  | 3.557850  |

---

## SUPPORTING INFORMATION

## TS2

Total energy of the optimized structure  $E = -1548.33913119$  Hartree

| Symbol | X         | Y         | Z         |
|--------|-----------|-----------|-----------|
| C      | -2.562721 | 0.793271  | -0.055305 |
| C      | -3.099518 | -0.488953 | -0.387763 |
| C      | -4.232253 | -0.505231 | -1.257029 |
| C      | -4.936874 | 0.699112  | -1.501159 |
| C      | -4.508796 | 1.855277  | -0.895890 |
| N      | -3.337998 | 1.891127  | -0.228029 |
| C      | -2.631546 | -1.754040 | 0.152483  |
| C      | -3.103346 | -2.969985 | -0.433516 |
| C      | -4.070828 | -2.919811 | -1.491905 |
| C      | -4.660019 | -1.742155 | -1.844104 |
| C      | -1.965496 | -4.265460 | 1.281678  |
| C      | -1.590794 | -3.066793 | 1.919631  |
| B      | -2.677483 | 3.232672  | 0.398322  |
| C      | -2.720137 | 4.443128  | -0.685518 |
| C      | -1.883853 | -1.839859 | 1.351048  |
| C      | -2.707884 | -4.213490 | 0.116507  |
| H      | -1.076238 | -3.103540 | 2.879151  |
| H      | -1.584179 | -0.927354 | 1.864658  |
| H      | -1.697902 | -5.227484 | 1.723840  |
| H      | -3.050050 | -5.132516 | -0.365261 |
| H      | -4.391721 | -3.858708 | -1.949432 |
| H      | -5.473859 | -1.717410 | -2.571676 |
| H      | -5.830372 | 0.697445  | -2.126356 |
| H      | -5.048875 | 2.799499  | -0.969690 |
| H      | -3.747159 | 4.797231  | -0.889853 |
| H      | -2.261274 | 4.171034  | -1.652498 |
| H      | -2.160391 | 5.311427  | -0.295398 |
| C      | -3.479152 | 3.571631  | 1.778528  |
| H      | -4.531515 | 3.848974  | 1.585434  |
| H      | -3.006580 | 4.430526  | 2.286707  |
| H      | -3.481627 | 2.728923  | 2.492149  |
| C      | -1.213184 | 2.616637  | 0.611649  |
| C      | 0.000401  | 3.278759  | 0.802247  |
| C      | 1.213889  | 2.616271  | 0.612289  |
| C      | 1.205557  | 1.216309  | 0.346612  |



SUPPORTING INFORMATION

---

|   |           |           |           |
|---|-----------|-----------|-----------|
| B | 2.678457  | 3.231898  | 0.398871  |
| C | 2.562841  | 0.792791  | -0.055549 |
| N | 3.337940  | 1.890660  | -0.229085 |
| C | 2.721781  | 4.443998  | -0.683007 |
| C | 3.480830  | 3.568180  | 1.779427  |
| C | 3.099656  | -0.489477 | -0.387616 |
| C | 4.508155  | 1.854814  | -0.897914 |
| H | 2.264568  | 4.173080  | -1.651105 |
| H | 3.748830  | 4.799249  | -0.885219 |
| H | 2.160764  | 5.311267  | -0.292434 |
| H | 4.533194  | 3.845543  | 1.586387  |
| H | 3.008680  | 4.426279  | 2.289344  |
| H | 3.483318  | 2.724202  | 2.491549  |
| C | 4.232094  | -0.506058 | -1.257179 |
| C | 2.631224  | -1.754469 | 0.152548  |
| C | 4.936279  | 0.698349  | -1.502582 |
| H | 5.047670  | 2.799263  | -0.972963 |
| C | 4.659759  | -1.743196 | -1.843948 |
| C | 3.102403  | -2.970537 | -0.433649 |
| C | 1.883967  | -1.840018 | 1.351370  |
| H | 5.829366  | 0.696533  | -2.128364 |
| C | 4.070077  | -2.920650 | -1.491875 |
| H | 5.473947  | -1.718819 | -2.571144 |
| C | 2.706441  | -4.213882 | 0.116316  |
| C | 1.590302  | -3.066861 | 1.919834  |
| H | 1.584818  | -0.927426 | 1.865135  |
| H | 4.390792  | -3.859660 | -1.949299 |
| C | 1.964172  | -4.265634 | 1.281565  |
| H | 3.048047  | -5.132985 | -0.365696 |
| H | 1.696030  | -5.227559 | 1.723606  |
| C | -1.205107 | 1.216728  | 0.345831  |
| C | 0.000121  | 0.500531  | 0.228332  |
| H | 0.000533  | 4.360890  | 0.972302  |
| H | 0.000041  | -0.555096 | -0.043879 |
| H | 1.076034  | -3.103514 | 2.879510  |

---

## SUPPORTING INFORMATION

## LM1

*((P,M)-H2-Me4)*Total energy of the optimized structure  $E = -1548.34146346$  Hartree

| Symbol | X         | Y         | Z         |
|--------|-----------|-----------|-----------|
| C      | 2.426422  | -1.002043 | -0.330694 |
| C      | 3.120716  | 0.243036  | -0.267224 |
| C      | 4.299237  | 0.353773  | -1.064238 |
| C      | 4.851708  | -0.813400 | -1.650432 |
| C      | 4.264750  | -2.031641 | -1.399222 |
| N      | 3.076490  | -2.106185 | -0.766854 |
| C      | 2.785775  | 1.333644  | 0.638275  |
| C      | 3.481616  | 2.574622  | 0.499859  |
| C      | 4.503721  | 2.709604  | -0.499428 |
| C      | 4.933550  | 1.631702  | -1.214965 |
| C      | 2.402433  | 3.435637  | 2.506062  |
| C      | 1.767816  | 2.189309  | 2.686572  |
| B      | 2.276853  | -3.477027 | -0.379653 |
| C      | 2.069742  | -4.397356 | -1.703409 |
| C      | 1.942578  | 1.170042  | 1.766206  |
| C      | 3.241429  | 3.622659  | 1.422734  |
| H      | 1.130680  | 2.023319  | 3.557845  |
| H      | 1.456068  | 0.212803  | 1.940211  |
| H      | 2.243857  | 4.240799  | 3.226489  |
| H      | 3.769040  | 4.569812  | 1.287925  |
| H      | 4.991521  | 3.680323  | -0.615820 |
| H      | 5.780711  | 1.715104  | -1.898905 |
| H      | 5.768841  | -0.751339 | -2.237154 |
| H      | 4.700107  | -2.978626 | -1.720769 |
| H      | 3.026777  | -4.779950 | -2.103316 |
| H      | 1.555772  | -3.863155 | -2.521826 |
| H      | 1.454016  | -5.280009 | -1.455805 |
| C      | 3.132193  | -4.209130 | 0.798063  |
| H      | 4.114645  | -4.566569 | 0.439564  |
| H      | 2.580457  | -5.093797 | 1.162042  |
| H      | 3.312225  | -3.554699 | 1.668975  |
| C      | 0.918965  | -2.763551 | 0.102875  |
| C      | -0.331024 | -3.280829 | 0.449690  |
| C      | -1.450140 | -2.451480 | 0.559843  |

SUPPORTING INFORMATION

---

|   |           |           |           |
|---|-----------|-----------|-----------|
| C | -1.333561 | -1.053929 | 0.283003  |
| B | -2.968647 | -2.857672 | 0.828398  |
| C | -2.692925 | -0.460427 | 0.176247  |
| N | -3.607998 | -1.442409 | 0.389924  |
| C | -3.524407 | -4.044580 | -0.135394 |
| C | -3.304924 | -3.100049 | 2.407556  |
| C | -3.160588 | 0.832080  | -0.249316 |
| C | -4.924276 | -1.297715 | 0.146113  |
| H | -3.391517 | -3.823642 | -1.209301 |
| H | -4.593527 | -4.270128 | 0.030106  |
| H | -2.971063 | -4.977208 | 0.073470  |
| H | -4.389628 | -3.224071 | 2.581024  |
| H | -2.813265 | -4.022844 | 2.761794  |
| H | -2.955676 | -2.274168 | 3.051896  |
| C | -4.514033 | 0.903185  | -0.712099 |
| C | -2.378228 | 2.061635  | -0.292006 |
| C | -5.403306 | -0.167113 | -0.461180 |
| H | -5.554875 | -2.152123 | 0.392218  |
| C | -4.972238 | 2.042664  | -1.452368 |
| C | -2.843437 | 3.151823  | -1.096860 |
| C | -1.232937 | 2.290465  | 0.505398  |
| H | -6.450963 | -0.093187 | -0.754215 |
| C | -4.140555 | 3.090076  | -1.703043 |
| H | -5.994749 | 2.031673  | -1.834884 |
| C | -2.067971 | 4.330169  | -1.209774 |
| C | -0.507351 | 3.467500  | 0.407800  |
| H | -0.934088 | 1.546583  | 1.240172  |
| H | -4.473524 | 3.934125  | -2.311522 |
| C | -0.900722 | 4.481546  | -0.484927 |
| H | -2.430392 | 5.133354  | -1.855782 |
| H | -0.309613 | 5.395942  | -0.569670 |
| C | 1.041345  | -1.353280 | -0.001615 |
| C | -0.070960 | -0.499216 | 0.019156  |
| H | -0.457292 | -4.362452 | 0.569771  |
| H | 0.062524  | 0.551693  | -0.219097 |
| H | 0.369987  | 3.609506  | 1.035818  |

---

## SUPPORTING INFORMATION

## TS1

Total energy of the optimized structure  $E = -1548.32645711$  Hartree

| Symbol | X         | Y         | Z         |
|--------|-----------|-----------|-----------|
| C      | 2.466481  | 0.916485  | 0.092685  |
| C      | 3.268797  | -0.293993 | -0.119614 |
| C      | 4.699704  | -0.130150 | -0.023517 |
| C      | 5.285090  | 1.104361  | 0.325123  |
| C      | 4.476305  | 2.189173  | 0.475315  |
| N      | 3.147531  | 2.078277  | 0.322652  |
| C      | 2.828700  | -1.656522 | -0.479955 |
| C      | 3.794605  | -2.663101 | -0.836141 |
| C      | 5.193868  | -2.398316 | -0.745482 |
| C      | 5.622780  | -1.187754 | -0.315268 |
| C      | 2.049026  | -4.315571 | -1.273060 |
| C      | 1.095163  | -3.368575 | -0.869842 |
| B      | 2.276334  | 3.422862  | 0.321600  |
| C      | 2.752519  | 4.351801  | -0.932349 |
| C      | 1.491112  | -2.096543 | -0.490683 |
| C      | 3.382841  | -3.955967 | -1.240869 |
| H      | 0.732587  | -1.425920 | -0.157029 |
| H      | 1.747431  | -5.318362 | -1.582671 |
| H      | 4.157054  | -4.676401 | -1.514869 |
| H      | 5.900621  | -3.189292 | -1.005489 |
| H      | 6.687680  | -0.972037 | -0.213432 |
| H      | 6.366665  | 1.191535  | 0.426086  |
| H      | 4.851243  | 3.188354  | 0.694869  |
| H      | 3.770470  | 4.760690  | -0.798902 |
| H      | 2.732049  | 3.812675  | -1.895849 |
| H      | 2.071379  | 5.215566  | -1.028044 |
| C      | 2.410092  | 4.173138  | 1.763724  |
| H      | 3.424523  | 4.573983  | 1.942957  |
| H      | 1.718564  | 5.032989  | 1.798986  |
| H      | 2.155396  | 3.516090  | 2.613958  |
| C      | 0.876105  | 2.724438  | 0.118123  |
| C      | -0.366458 | 3.355522  | 0.025381  |
| C      | -1.552236 | 2.627427  | -0.055536 |
| C      | -1.442796 | 1.219291  | 0.044568  |
| B      | -3.071815 | 3.060341  | -0.318833 |

SUPPORTING INFORMATION

---

|   |           |           |           |
|---|-----------|-----------|-----------|
| C | -2.776143 | 0.599439  | -0.052005 |
| N | -3.676386 | 1.551089  | -0.399948 |
| C | -3.287690 | 3.816909  | -1.742520 |
| C | -3.791054 | 3.815364  | 0.933515  |
| C | -3.201826 | -0.763028 | 0.061328  |
| C | -4.923688 | 1.250307  | -0.813451 |
| H | -2.873015 | 3.253426  | -2.596858 |
| H | -4.353101 | 4.016332  | -1.958842 |
| H | -2.779150 | 4.796863  | -1.723304 |
| H | -4.871966 | 3.968509  | 0.760457  |
| H | -3.342964 | 4.814603  | 1.075218  |
| H | -3.679462 | 3.268691  | 1.886372  |
| C | -4.448237 | -1.094647 | -0.552051 |
| C | -2.475468 | -1.819498 | 0.753325  |
| C | -5.314695 | -0.056146 | -0.974691 |
| H | -5.567197 | 2.096338  | -1.057158 |
| C | -4.810753 | -2.470429 | -0.735778 |
| C | -2.844890 | -3.179937 | 0.512182  |
| C | -1.498838 | -1.572277 | 1.749114  |
| H | -6.289822 | -0.294113 | -1.400811 |
| C | -4.002853 | -3.470518 | -0.283652 |
| H | -5.741069 | -2.695358 | -1.261321 |
| C | -2.123986 | -4.225462 | 1.139947  |
| C | -0.829234 | -2.609909 | 2.375967  |
| H | -1.286213 | -0.547935 | 2.048246  |
| H | -4.264010 | -4.516753 | -0.459362 |
| C | -1.115347 | -3.949135 | 2.044809  |
| H | -2.402650 | -5.258445 | 0.918610  |
| H | -0.567847 | -4.761998 | 2.526243  |
| C | 0.997998  | 1.297970  | 0.066927  |
| C | -0.203469 | 0.567346  | 0.066952  |
| H | -0.397191 | 4.450723  | 0.009849  |
| H | -0.264131 | -0.502176 | 0.100384  |
| H | -0.080375 | -2.383967 | 3.137958  |
| H | 0.034730  | -3.625154 | -0.834134 |

---

## SUPPORTING INFORMATION

## 9. References

- [1] J. R. Lakowicz, *Principles of Fluorescence Spectroscopy*, 2nd ed., Kluwer Academic/Plenum, New York, **1999**.
- [2] I. B. Berlman in *Handbook of Fluorescence Spectra of Aromatic Molecules*, 2nd ed., Academic Press, New York, **1971**, p. 399.
- [3] A. J. Fry in *Laboratory Techniques in Electroanalytical Chemistry*, 2nd ed. (Eds.: P. T. Kissinger, W. R. Heineman), Marcel Dekker Ltd, New York, **1996**, p. 481.
- [4] V. Mamane, F. Louërat, J. Iehl, M. Abboud, Y. Fort, *Tetrahedron* **2008**, *64*, 10699-10705.
- [5] R. Sun, X. Yang, Q. Li, K. Xu, J. Tang, X. Zheng, M. Yuan, H. Fu, R. Li, H. Chen, *Org. Lett.* **2019**, *21*, 9425-9429.
- [6] J. Zheng, S. L. You, *Angew. Chem. Int. Ed.* **2014**, *53*, 13244-13247; *Angew. Chem.* **2014**, *126*, 13460-13463.
- [7] A. Fürstner, V. Mamane, *J. Org. Chem.* **2002**, *67*, 6264-6267.
- [8] M. Kastler, J. Schmidt, W. Pisula, D. Sebastiani, K. Müllen, *J. Am. Chem. Soc.* **2006**, *128*, 9526-9534.
- [9] A. Gosset, Z. Xu, F. Maurel, L. M. Chamoreau, S. Nowak, G. Vives, C. Perruchot, V. Heitz, H. P. Jacquot De Rouville, *New J. Chem.* **2018**, *42*, 4728-4734.
- [10] G. M. Sheldrick, *Acta Crystallogr. A* **2008**, *64*, 112-122.
- [11] Gaussian 09, Revision D.01, M. J. Frisch, G. W. Trucks, H. B. Schlegel, G. E. Scuseria, M. A. Robb, J. R. Cheeseman, G. Scalmani, V. Barone, B. Mennucci, G. A. Petersson, H. Nakatsuji, M. Caricato, X. Li, H. P. Hratchian, A. F. Izmaylov, J. Bloino, G. Zheng, J. L. Sonnenberg, M. Hada, M. Ehara, K. Toyota, R. Fukuda, J. Hasegawa, M. Ishida, T. Nakajima, Y. Honda, O. Kitao, H. Nakai, T. Vreven, J. A. Jr. Montgomery, J. E. Peralta, F. Ogliaro, M. Bearpark, J. J. Heyd, E. Brothers, K. N. Kudin, V. N. Staroverov, T. Keith, R. Kobayashi, J. Normand, K. Raghavachari, A. Rendell, J. C. Burant, S. S. Iyengar, J. Tomasi, M. Cossi, N. Rega, J. M. Millam, M. Klene, J. E. Knox, J. B. Cross, V. Bakken, C. Adamo, J. Jaramillo, R. Gomperts, R. E. Stratmann, O. Yazyev, A. J. Austin, R. Cammi, C. Pomelli, J. W. Ochterski, R. L. Martin, K. Morokuma, V. G. Zakrzewski, G. A. Voth, P. Salvador, J. J. Dannenberg, S. Dapprich, A. D. Daniels, O. Farkas, J. B. Foresman, J. V. Ortiz, J. Cioslowski, D. J. Fox, Gaussian, Inc., Wallingford CT, 2013.
- [12] a) A. D. Becke, *Phys. Rev. A* **1988**, *38*, 3098-3100; b) C. Lee, W. Yang, R. G. Parr, *Phys. Rev. B* **1988**, *37*, 785-789; c) A. D. Becke, *J. Chem. Phys.* **1993**, *98*, 5648-5652.
- [13] a) A. Schäfer, C. Huber, R. Ahlrichs, *J. Chem. Phys.* **1994**, *100*, 5829-5835; b) F. Weigend, R. Ahlrichs, *Phys. Chem. Chem. Phys.* **2005**, *7*, 3297-3305; c) F. Weigend, *Phys. Chem. Chem. Phys.* **2006**, *8*, 1057-1065.
- [14] S. Grimme, S. Ehrlich, L. Goerigk, *J. Comput. Chem.* **2011**, *32*, 1456-1465.
- [15] T. Yanai, D. P. Tew, N. C. Handy, *Chem. Phys. Lett.* **2004**, *393*, 51-57.
- [16] GaussView, Version 5, R. Dennington, T. Keith, J. Millam, Semichem Inc., Shawnee Mission KS, 2009.
- [17] N. M. O'Boyle, A. L. Tenderholt, K. M. Langner, *J. Comp. Chem.* **2008**, *29*, 839-845.
